# Supplementary material
Source: Royal Society of Chemistry journal article supplement (doi:10.1039/d6nj01410k)

## Supplementary Information

# TEMPO-Promoted Thioacid–Amine Coupling for Peptide Synthesis

Surya Pratap Singh<sup>†a</sup>, Upasana Chatterjee<sup>†a</sup>, Daniel T. Glatzhofer<sup>a</sup> and Indrajeet Sharma<sup>\*a</sup>

<sup>a</sup>Department of Chemistry and Biochemistry, University of Oklahoma, 101 Stephenson Parkway, Norman, Oklahoma 73019- 5251, United States

\*Correspondence to: [isharma@ou.edu](mailto:isharma@ou.edu)

### Content

|                                                                    |     |
|--------------------------------------------------------------------|-----|
| Table of contents                                                  | S1  |
| Materials and methods                                              | S2  |
| List of synthesized thioacids                                      | S3  |
| General procedure for TEMPO-mediated thioacid-amine coupling       | S3  |
| Optimization of the reaction conditions                            | S3  |
| Substrate scope of this methodology                                | S4  |
| Synthesis of tripeptides                                           | S9  |
| Mechanistic studies                                                | S11 |
| Physical observations of the reaction mixtures                     | S13 |
| UV-Visible studies of the starting materials and reaction mixtures | S14 |
| Cyclic voltammetry study for thioacetate and TEMPO                 | S15 |
| Plausible, detailed mechanistic pathway(s)                         | S16 |
| Computational Studies                                              | S18 |
| XYZ Coordinates and Frequencies                                    | S20 |
| References                                                         | S29 |
| Copies of NMR spectra                                              | S32 |

## Materials and methods

### Reagents:

Reagents and solvents were obtained from Sigma-Aldrich ([www.sigma-aldrich.com](http://www.sigma-aldrich.com)), Chem-Impex ([www.chemimpex.com](http://www.chemimpex.com)) or Acros Organics ([www.fishersci.com](http://www.fishersci.com)) and used without further purification unless otherwise indicated. Dry solvents (acetonitrile) were obtained from Acros Organics ([www.fishersci.com](http://www.fishersci.com)), and dichloromethane was distilled over  $\text{CaH}_2$  under  $\text{N}_2$  unless otherwise indicated. THF purchased from Sigma-Aldrich was distilled over Na metal with benzophenone indicator. Toluene was obtained from Sigma-Aldrich.

### Reactions:

All reactions were performed in flame-dried glassware under positive  $\text{N}_2$  pressure with magnetic stirring unless otherwise noted. Liquid reagents and solutions were transferred through rubber septa via syringes flushed with  $\text{N}_2$  before use. Cold baths were generated as follows: 0 °C with wet ice/water and -78 °C with dry ice/acetone.

### Chromatography:

TLC was performed on 0.25 mm E. Merck silica gel 60 F254 plates and visualized under UV light (254 nm) or by staining with potassium permanganate ( $\text{KMnO}_4$ ), cerium ammonium molybdate (CAM), phosphomolybdic acid (PMA), and ninhydrin. Silica flash chromatography was performed on Sorbtech 230–400 mesh silica gel 60.

### Analytical Instrumentation:

NMR spectra were recorded on a Varian VNMRS 400 and 500 MHz NMR spectrometer in  $\text{CDCl}_3$  unless otherwise indicated. Chemical shifts are expressed in ppm relative to solvent signals:  $\text{CDCl}_3$  ( $^1\text{H}$ , 7.26 ppm,  $^{13}\text{C}$ , 77.0 ppm); coupling constants are expressed in Hz. NMR spectra were processed using Mnova ([www.mestrelab.com/software/mnova-nmr](http://www.mestrelab.com/software/mnova-nmr)). Mass spectra were obtained at the OU Analytical Core Facility on an Agilent 6538 High-Mass-Resolution QTOF Mass Spectrometer and an Agilent 1290 UPLC.

### Nomenclature:

N.B.: Atom numbers shown in chemical structures herein correspond to IUPAC nomenclature, which was used to name each compound.

## List of thioacids used in TEMPO-promoted peptide bond formation:

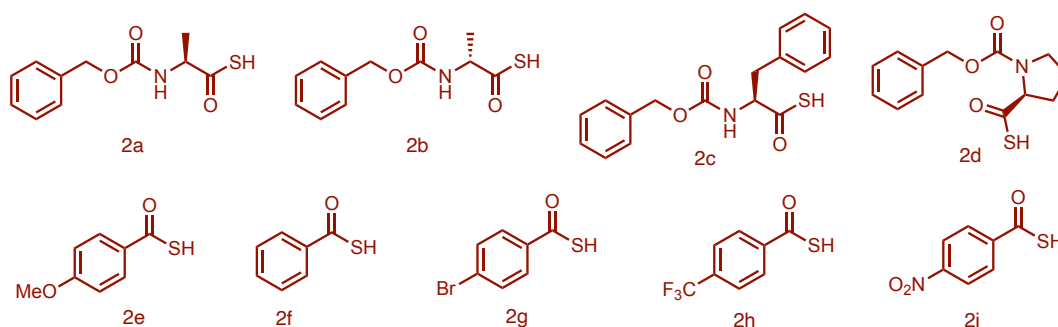

**Figure S1:** List of thioacids screened in this study.

All the above-stated thioacids (**2a**<sup>1,2</sup>, **2b**<sup>2</sup>, **2c**<sup>3</sup>, **2d**<sup>4</sup>, **2e**<sup>5,6</sup>, **2f**<sup>6</sup>, **2g**<sup>7</sup>, **2h**<sup>8</sup>, and **2i**<sup>9</sup>) were synthesized using the known synthetic procedures in the literature, as stated below.

## General Procedure for the synthesis of peptides using thioacid and amines:

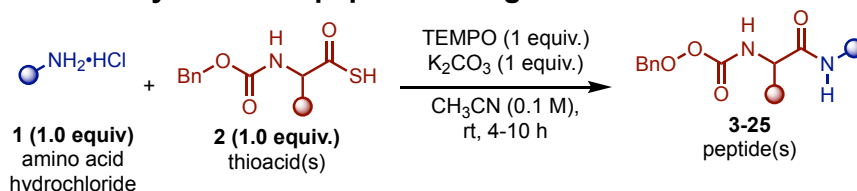

**Figure S2:** General scheme for the synthesis of peptides

In an oven-dried vial equipped with a stir bar, amino acid methyl ester hydrochloride salt (0.1 mmol) was combined with thioacid (0.1 mmol, 1.0 equiv.), TEMPO (1.0 equiv.),  $\text{K}_2\text{CO}_3$  (1.0 equiv.) was dissolved in  $\text{CH}_3\text{CN}$  (0.1M). The mixture was stirred at room temperature for 6h - 8h. The reaction was monitored with thin-layer chromatography. The reaction mixture was diluted with ethyl acetate and washed with brine. The organic layer was combined, dried over  $\text{Na}_2\text{SO}_4$ , and evaporated to dryness. The crude was purified with column chromatography (EtOAc: Hexane) to afford the dipeptides and tripeptides.

## Optimization of the reaction conditions:

We initiated our studies using L-alanine methyl ester hydrochloride (**1a**) as a model amine and Z-L-Ala-SH (**2a**) as a model thioacid. To neutralize the amine hydrochloride salt, we employed  $\text{K}_2\text{CO}_3$  as a base and screened TEMPO as an oxidant in acetonitrile. The reaction proceeded efficiently, delivering the desired peptide (**3**) in good yield within 6 hours (entry 1). Next, we evaluated DDQ as an alternative oxidant, which did lead to product formation, albeit in significantly lower yield (entry 2). Following this, we screened molecular oxygen (20 psi) as an oxidant, leading to peptide formation with poor yields (entry 3), confirming TEMPO as the best oxidant. We also tested diisopropylethylamine (DIPEA) as an organic base (entry 4), which yielded a good result, although  $\text{K}_2\text{CO}_3$  remained superior in terms of efficiency and reproducibility. Having optimized the oxidant and base, we turned our attention to solvents. In pursuit of greener and industrially viable conditions, we screened methanol (entry 5) and ethanol (entry 6), both of which afforded the product in good yields. However, when we tested tetrahydrofuran (THF), a coordinating and basic solvent (entry 7), and toluene, an aromatic solvent (entry 8), we observed only trace amounts of product, indicating incompatibility. Since biological peptide construction typically occurs in aqueous media, we also explored aqueous solvent systems (entries 9-13). Acetonitrile containing up to 30% water supported product formation in reasonable yields but increasing the water content to 40% and 50% drastically reduced the yield to trace levels. To further improve productivity, we increased the loading of thioacid to 1.5 equivalents (entry 14), and significant yield improvement was observed. We also performed reactions in the dark (entry 15) and in the presence of 440 nm blue light (entry 16). However, the outcome was unaffected and produced identical results. In summary, the optimized conditions involve using TEMPO as the oxidant,  $\text{K}_2\text{CO}_3$  as the base,  $\text{CH}_3\text{CN}$  as the solvent, and 1.0–1.5 equivalents of the thioacid; equimolar amounts were preferred for scope exploration.

**Table S1:** Optimization of the reaction conditions for TEMPO-mediated peptide bond formation.<sup>a</sup>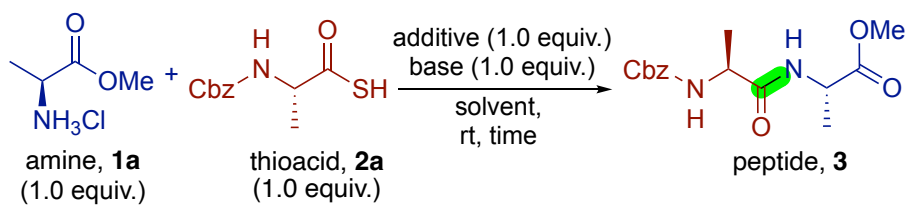

| entry            | additive                | base                           | solvent                                   | time | <b>3</b> , yield% <sup>b</sup> |
|------------------|-------------------------|--------------------------------|-------------------------------------------|------|--------------------------------|
| 1.               | TEMPO                   | K <sub>2</sub> CO <sub>3</sub> | CH <sub>3</sub> CN                        | 6 h  | 65(60) <sup>c</sup>            |
| 2.               | DDQ                     | K <sub>2</sub> CO <sub>3</sub> | CH <sub>3</sub> CN                        | 6 h  | 50                             |
| 3.               | O <sub>2</sub> (15 psi) | K <sub>2</sub> CO <sub>3</sub> | CH <sub>3</sub> CN                        | 24 h | 19                             |
| 4.               | TEMPO                   | DIPEA                          | CH <sub>3</sub> CN                        | 6 h  | 58                             |
| 5.               | TEMPO                   | K <sub>2</sub> CO <sub>3</sub> | MeOH                                      | 24 h | 55                             |
| 6.               | TEMPO                   | K <sub>2</sub> CO <sub>3</sub> | EtOH                                      | 24 h | 50                             |
| 7.               | TEMPO                   | K <sub>2</sub> CO <sub>3</sub> | THF                                       | 24 h | <10                            |
| 8.               | TEMPO                   | K <sub>2</sub> CO <sub>3</sub> | toluene                                   | 24 h | <10                            |
| 9.               | TEMPO                   | K <sub>2</sub> CO <sub>3</sub> | CH <sub>3</sub> CN:H <sub>2</sub> O (9:1) | 8 h  | 50                             |
| 10.              | TEMPO                   | K <sub>2</sub> CO <sub>3</sub> | CH <sub>3</sub> CN:H <sub>2</sub> O (8:2) | 9 h  | 43                             |
| 11.              | TEMPO                   | K <sub>2</sub> CO <sub>3</sub> | CH <sub>3</sub> CN:H <sub>2</sub> O (7:3) | 9 h  | 46                             |
| 12.              | TEMPO                   | K <sub>2</sub> CO <sub>3</sub> | CH <sub>3</sub> CN:H <sub>2</sub> O (6:4) | 12 h | 33                             |
| 13.              | TEMPO                   | K <sub>2</sub> CO <sub>3</sub> | CH <sub>3</sub> CN:H <sub>2</sub> O (1:1) | 15 h | <10                            |
| 14. <sup>d</sup> | TEMPO                   | K <sub>2</sub> CO <sub>3</sub> | CH <sub>3</sub> CN                        | 6 h  | 80                             |
| 15. <sup>e</sup> | TEMPO                   | K <sub>2</sub> CO <sub>3</sub> | CH <sub>3</sub> CN                        | 6 h  | 65                             |
| 16. <sup>f</sup> | TEMPO                   | K <sub>2</sub> CO <sub>3</sub> | CH <sub>3</sub> CN                        | 6 h  | 63                             |

<sup>a</sup>All reactions were conducted with amine **1** (0.1 mmol, 1.0 equiv.), thioacid **2** (1.0 equiv.), additive (1.0 equiv.), and solvent (1.0 mL, 0.1 M). <sup>b</sup>Yields were calculated by analyzing <sup>1</sup>H-NMR of crude sample with 1,3,5-trimethoxybenzene as an internal standard. <sup>c</sup>Isolated yield. <sup>d</sup>1.5 equiv. thioacid was added. <sup>e</sup>Reaction was performed in the dark. <sup>f</sup>Reaction was irradiated with 440 nm blue light.

### Substrate scope of this methodology

#### Synthesis of Z-D-Ala-SH (**2b**)

Following the literature-known procedure<sup>2</sup>, thioacid (**2b**) was synthesized as a viscous liquid.

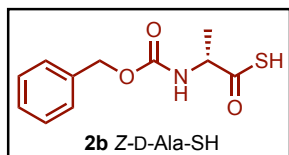

<sup>1</sup>H NMR (500 MHz, CDCl<sub>3</sub>) δ 7.36 (s, 5H), 5.36 (d, *J* = 8.1 Hz, 1H), 5.14 (s, 2H), 4.49 – 4.34 (m, 1H), 1.41 (d, *J* = 7.3 Hz, 3H).

<sup>13</sup>C NMR (500 MHz, CDCl<sub>3</sub>) δ 200.4, 155.7, 136.0, 128.7, 128.5, 128.3, 67.4, 57.7, 18.2.

**LRMS:** calc. for C<sub>11</sub>H<sub>14</sub>NO<sub>3</sub>S (M+H): 240.1; found: 240.2.

## Scope of amino acid methyl esters

### Synthesis of Z-L-Ala-L-Ala-OMe (3)

With 1.0 equivalent of thioacid: following the general procedure, L-alanine methyl ester hydrochloride salt (14.0 mg, 100.0 μmol) was coupled with thioacid **2a** (24.0 mg, 100.0 μmol) to afford **3** (20.0 mg, 64.9 μmol, 65% yield) as a white solid.

With 1.5 equivalents of thioacid: following the general procedure, L-alanine methyl ester hydrochloride salt (14.0 mg, 100.0 μmol) was coupled with thioacid **2a** (36.0 mg, 150.0 μmol) to afford **4** (23.6 mg, 80.2 μmol, 80% yield) as a white solid.

R<sub>f</sub> = 0.4 (EtOAc: Hexane = 1:1).

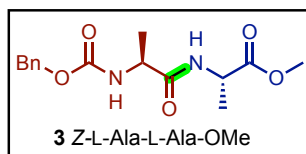

**Gram Scale synthesis:** Following the general procedure, L-alanine methyl ester hydrochloride salt (850 mg, 6.09 mmol) was coupled with thioacid **2a** (1.46 g, 6.09 mmol) to afford **3** (1.31 g, 4.25 mmol, 70% yield) as a white solid. R<sub>f</sub> = 0.4 (EtOAc: Hexane = 1:1).

<sup>1</sup>H NMR (500 MHz, CDCl<sub>3</sub>) δ 7.38 – 7.30 (m, 5H), 6.50 (s, 1H), 5.36 – 5.28 (m, 1H), 5.11 (s, 2H), 4.56 (t, J = 7.3 Hz, 1H), 4.26 (t, J = 7.5 Hz, 1H), 3.75 (s, 3H), 1.39 (d, J = 7.1 Hz, 6H).

<sup>13</sup>C NMR (500 MHz, CDCl<sub>3</sub>) δ 172.7, 170.3, 156.2, 136.2, 128.7, 128.4, 128.2, 67.2, 52.5, 50.5, 41.3, 18.6. The data are identical to the literature report.<sup>10</sup>

### Synthesis of Z-L-Ala-Gly-OMe (4)

With 1.0 equivalent of thioacid: following the general procedure, L-glycine methyl ester hydrochloride salt (12.5 mg, 100.0 μmol) was coupled with thioacid **2a** (24.0 mg, 100.0 μmol) to afford **4** (18.5 mg, 62.9 μmol, 63% yield) as a white solid.

With 1.5 equivalents of thioacid: following the general procedure, L-glycine methyl ester hydrochloride salt (12.5 mg, 100.0 μmol) was coupled with thioacid **2a** (35.74 mg, 150.0 μmol) to afford **4** (25 mg, 84.9 μmol, 85% yield) as a white solid.

R<sub>f</sub> = 0.4 (EtOAc: Hexane = 1:1).

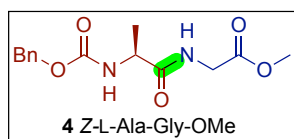

<sup>1</sup>H NMR (500 MHz, CDCl<sub>3</sub>) δ 7.38 – 7.28 (m, 5H), 6.70 (s, 1H), 5.42 (d, J = 7.7 Hz, 1H), 5.11 (q, J = 12.2 Hz, 2H), 4.34 – 4.27 (m, 1H), 4.02 (dd, J = 5.6, 2.8 Hz, 2H), 3.74 (s, 3H), 1.40 (d, J = 7.1 Hz, 3H).

<sup>13</sup>C NMR (500 MHz, CDCl<sub>3</sub>) δ 172.7, 170.3, 156.2, 136.2, 128.7, 128.4, 128.2, 67.2, 52.54, 50.5, 41.3, 18.6. The data are identical to the literature report.<sup>11</sup>

### Synthesis of Z-L-Ala-D-Ala-OMe (5)

With 1.0 equivalent of thioacid: following the general procedure, D-alanine methyl ester hydrochloride salt (14.0 mg, 100.0 μmol) was coupled with thioacid **2a** (24.0 mg, 100.0 μmol) to afford **5** (18.5 mg, 62.9 μmol, 63% yield) as a white solid.

With 1.5 equivalents of thioacid: following the general procedure, D-alanine methyl ester hydrochloride salt (14.0 mg, 100.0 μmol) was coupled with thioacid **2a** (36.0 mg, 150.0 μmol) to afford **5** (25.4 mg, 82.4 μmol, 82% yield) as a white solid.

R<sub>f</sub> = 0.4 (EtOAc: Hexane = 1:1).

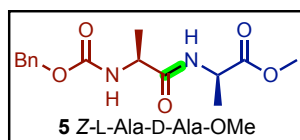

<sup>1</sup>H NMR (500 MHz, CDCl<sub>3</sub>) δ 7.39 – 7.30 (m, 5H), 6.57 (s, 1H), 5.26 (s, 1H), 5.13 (d, J = 3.2 Hz, 2H), 4.56 (p, J = 7.3 Hz, 1H), 4.27 (d, J = 9.8 Hz, 1H), 3.74 (s, 3H), 1.40 (t, J = 6.1 Hz, 6H).

<sup>13</sup>C NMR (500 MHz, CDCl<sub>3</sub>) δ 173.3, 171.8, 156.1, 136.2, 128.7, 128.4, 128.3, 67.3, 52.7, 50.6, 48.2, 18.6, 18.4. The data are identical to the literature report.<sup>12</sup>

### Synthesis of Z-L-Ala-L-Pro-OMe (6)

With 1.0 equivalent of thioacid: following the general procedure, L-proline methyl ester hydrochloride salt (16.6 mg, 100.0  $\mu\text{mol}$ ) was coupled with thioacid **2a** (24.0 mg, 100.0  $\mu\text{mol}$ ) to afford **6** (22.1 mg, 66.0  $\mu\text{mol}$ , 66% yield) as a yellow oil.

With 1.5 equivalents of thioacid: following the general procedure, L-proline methyl ester hydrochloride salt (16.6 mg, 100.0  $\mu\text{mol}$ ) was coupled with thioacid **2a** (38.4 mg, 150.0  $\mu\text{mol}$ ) to afford **6** (28.8 mg, 86.2  $\mu\text{mol}$ , 86% yield) as a white solid.

$R_f = 0.4$  (EtOAc: Hexane = 1:1)

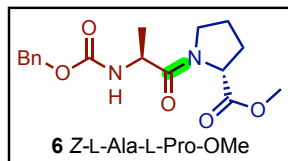

$^1\text{H NMR}$  (500 MHz,  $\text{CDCl}_3$ )  $\delta$  7.36 – 7.28 (m, 5H), 5.68 (d,  $J = 8.0$  Hz, 1H), 5.12 – 5.04 (m, 2H), 4.52 (dd,  $J = 8.7, 5.0$  Hz, 2H), 3.71 (d,  $J = 2.0$  Hz, 3H), 3.69 – 3.66 (m, 1H), 3.63 – 3.56 (m, 1H), 2.25 – 2.15 (m, 1H), 2.09 – 1.94 (m, 3H), 1.41 – 1.35 (m, 3H).

$^{13}\text{C NMR}$  (500 MHz,  $\text{CDCl}_3$ )  $\delta$  172.5, 171.4, 155.8, 136.5, 128.6, 128.2, 128.1, 66.9, 58.8, 52.4, 48.4, 46.9, 29.1, 25.0, 18.5. The data are identical to the literature report.<sup>13</sup>

### Synthesis of Z-L-Ala-L-Met-OMe (7)

With 1.0 equivalent of thioacid: following the general procedure, L-methionine methyl ester hydrochloride salt (20.0 mg, 100.0  $\mu\text{mol}$ ) was coupled with thioacid **2a** (24.0 mg, 100.0  $\mu\text{mol}$ ) to afford **7** (21.7 mg, 59.0  $\mu\text{mol}$ , 59% yield) as a white solid.

With 1.5 equivalents of thioacid: following the general procedure, L-methionine methyl ester hydrochloride salt (20.0 mg, 100.0  $\mu\text{mol}$ ) was coupled with thioacid **2a** (36.0 mg, 150.0  $\mu\text{mol}$ ) to afford **7** (29.2 mg, 79.2  $\mu\text{mol}$ , 79% yield) as a white solid.

$R_f = 0.4$  (EtOAc: Hexane = 1:1)

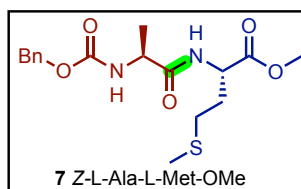

$^1\text{H NMR}$  (500 MHz,  $\text{CDCl}_3$ )  $\delta$  7.38 – 7.30 (m, 5H), 6.74 – 6.68 (m, 1H), 5.33 (d,  $J = 7.6$  Hz, 1H), 5.11 (s, 2H), 4.69 (td,  $J = 7.6, 5.0$  Hz, 1H), 4.27 (s, 1H), 3.75 (s, 3H), 2.49 (t,  $J = 7.4$  Hz, 2H), 2.17 (dt,  $J = 14.1, 6.8$  Hz, 1H), 2.07 (s, 3H), 1.99 (dt,  $J = 14.2, 7.1$  Hz, 1H), 1.40 (d,  $J = 7.0$  Hz, 3H).

$^{13}\text{C NMR}$  (500 MHz,  $\text{CDCl}_3$ )  $\delta$  172.3, 172.2, 156.1, 136.2, 128.7, 128.4, 128.2, 52.7, 51.7, 31.5, 30.0, 15.6. The data are identical to the literature report.<sup>14</sup>

### Synthesis of Z-L-Pro-L-Phe-OMe (8)

With 1.0 equivalent of thioacid: following the general procedure, L-phenylalanine methyl ester hydrochloride salt (21.6 mg, 100.0  $\mu\text{mol}$ ) was coupled with thioacid **2d** (26.5 mg, 100.0  $\mu\text{mol}$ ) to afford **8** (25.4 mg, 62.0  $\mu\text{mol}$ , 62% yield) as a white solid.

With 1.5 equivalents of thioacid: following the general procedure, L-phenylalanine methyl ester hydrochloride salt (21.6 mg, 100.0  $\mu\text{mol}$ ) was coupled with thioacid **2d** (39.9 mg, 150.0  $\mu\text{mol}$ ) to afford **8** (33.3 mg, 81.1  $\mu\text{mol}$ , 81% yield) as a white solid.

$R_f = 0.4$  (EtOAc: Hexane = 1:1).

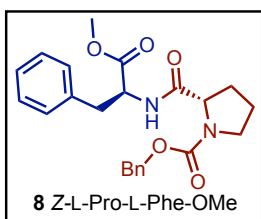

$^1\text{H NMR}$  (500 MHz,  $\text{CDCl}_3$ )  $\delta$  7.40 – 7.29 (m, 6H), 7.23 (d,  $J = 7.2$  Hz, 3H), 7.09 – 7.01 (m, 2H), 5.20 – 5.05 (m, 2H), 4.84 (d,  $J = 7.1$  Hz, 1H), 4.34 (d,  $J = 7.2$  Hz, 1H), 3.69 (d,  $J = 36.5$  Hz, 3H), 3.49 – 3.30 (m, 2H), 3.22 – 3.08 (m, 1H), 2.99 (dd,  $J = 13.6, 7.2$  Hz, 1H), 2.04 (s, 1H), 1.82 (s, 2H), 1.63 (s, 1H).

$^{13}\text{C NMR}$  (500 MHz,  $\text{CDCl}_3$ )  $\delta$  172.0, 171.7, 171.3, 156.2, 155.1, 136.5, 136.2, 129.4, 129.2, 128.7, 128.5, 128.2, 128.1, 127.3, 127.0, 77.4, 77.2, 76.9, 67.5, 60.9, 60.3, 53.3, 52.8, 52.5, 47.5, 47.0, 38.0, 30.9, 28.0, 24.6, 23.5. The data are identical to the literature report.<sup>15</sup>

### Synthesis of Z-L-Ala-L-Phe-OMe (9)

Following the general procedure, L-phenylalanine methyl ester hydrochloride salt (21.6 mg, 100.0  $\mu\text{mol}$ ) was coupled with thioacid **2a** (24.0 mg, 100.0  $\mu\text{mol}$ ) to afford **9** (25.9 mg, 67.3  $\mu\text{mol}$ , 67% yield) as a white solid.  $R_f = 0.4$  (EtOAc: Hexane = 1:1).

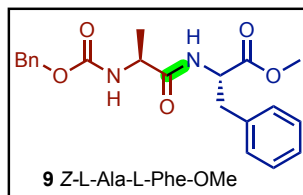

**$^1\text{H}$  NMR** (500 MHz,  $\text{CDCl}_3$ )  $\delta$  7.39 – 7.30 (m, 5H), 7.27 (d,  $J = 6.9$  Hz, 1H), 7.26 – 7.21 (m, 2H), 7.08 (d,  $J = 7.1$  Hz, 2H), 6.41 (d,  $J = 7.8$  Hz, 1H), 5.21 (d,  $J = 7.4$  Hz, 1H), 5.11 (t,  $J = 10.8$  Hz, 2H), 4.85 (q,  $J = 6.2$  Hz, 1H), 4.21 (t,  $J = 7.3$  Hz, 1H), 3.73 (s, 3H), 3.19 – 3.04 (m, 2H), 1.34 (d,  $J = 7.0$  Hz, 3H)

**$^{13}\text{C}$  NMR** (500 MHz,  $\text{CDCl}_3$ )  $\delta$  171.8, 171.8, 136.3, 135.7, 129.4, 128.7, 128.7, 128.4, 128.2, 127.3, 67.2, 53.3, 52.6, 50.5, 37.9. The data are identical to the literature report.<sup>16</sup>

### Synthesis of Z-L-Ala-L-Trp-OMe (10)

Following the general procedure, L-tryptophan methyl ester hydrochloride salt (25.5 mg, 100.0  $\mu\text{mol}$ ) was coupled with thioacid **2** (24.0 mg, 100.0  $\mu\text{mol}$ ) to afford **10** (22.8 mg, 53.8  $\mu\text{mol}$ , 54% yield) as a yellowish white solid.  $R_f = 0.4$  (EtOAc: Hexane = 1:1).

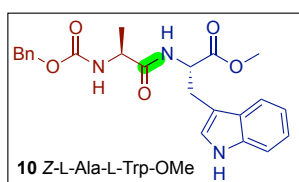

**$^1\text{H}$  NMR** (500 MHz,  $\text{CDCl}_3$ )  $\delta$  8.17 (s, 1H), 7.50 (d,  $J = 7.9$  Hz, 1H), 7.33 (dd,  $J = 13.1, 6.8$  Hz, 5H), 7.15 (d,  $J = 7.7$  Hz, 1H), 7.08 (t,  $J = 7.5$  Hz, 1H), 6.93 (s, 1H), 6.63 (d,  $J = 7.9$  Hz, 1H), 5.35 (d,  $J = 7.9$  Hz, 1H), 5.04 (t,  $J = 14.3$  Hz, 2H), 4.93 – 4.85 (m, 1H), 4.25 (t,  $J = 7.4$  Hz, 1H), 3.66 (s, 3H), 3.29 (d,  $J = 5.4$  Hz, 2H), 1.29 (dd,  $J = 18.6, 7.1$  Hz, 4H).

**$^{13}\text{C}$  NMR** (500 MHz,  $\text{CDCl}_3$ )  $\delta$  172.2, 172.1, 156, 136.4, 136.2, 128.7, 128.3, 128.2, 127.6, 123.2, 122.3, 119.7, 118.5, 111.5, 109.6, 67.0, 53.0, 52.6, 50.5, 27.6, 18.7. The data are identical to the literature report.<sup>17</sup>

### Synthesis of Z-L-Ala-L-Leu-OMe (11)

Following the general procedure, L-leucine methyl ester hydrochloride salt (18.2 mg, 100.0  $\mu\text{mol}$ ) was coupled with thioacid **2a** (24.0 mg, 100.0  $\mu\text{mol}$ ) to afford **11** (18.7 mg, 55.5  $\mu\text{mol}$ , 55% yield) as a yellowish white solid.  $R_f = 0.4$  (EtOAc: Hexane = 1:1).

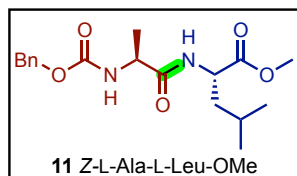

**$^1\text{H}$  NMR** (500 MHz,  $\text{CDCl}_3$ )  $\delta$  7.38 – 7.28 (m, 5H), 6.57 (d,  $J = 8.2$  Hz, 1H), 5.47 (d,  $J = 7.8$  Hz, 1H), 5.10 (s, 2H), 4.59 (td,  $J = 8.7, 4.6$  Hz, 1H), 4.30 (p,  $J = 7.2$  Hz, 1H), 3.72 (s, 3H), 1.62 (t,  $J = 4.1$  Hz, 2H), 1.53 (t,  $J = 8.5$  Hz, 1H), 1.38 (d,  $J = 7.0$  Hz, 3H), 0.90 (d,  $J = 6.0$  Hz, 6H).

**$^{13}\text{C}$  NMR** (500 MHz,  $\text{CDCl}_3$ )  $\delta$  173.3, 172.2, 156.0, 136.3, 128.7, 128.3, 128.1, 67.1, 52.4, 50.8, 50.4, 41.5, 24.9, 22.9, 21.9, 18.7. The data are identical to the literature report.<sup>18</sup>

### Synthesis of Z-L-Ala-D-Leu-OMe (12)

Following the general procedure, D-leucine methyl ester hydrochloride salt (18.2 mg, 100.0  $\mu\text{mol}$ ) was coupled with thioacid **2a** (24.0 mg, 100.0  $\mu\text{mol}$ ) to afford **12** (19.3 mg, 57.3  $\mu\text{mol}$ , 57% yield) as a yellowish white solid.  $R_f = 0.4$  (EtOAc: Hexane = 1:1).

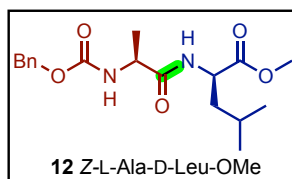

**$^1\text{H}$  NMR** (400 MHz,  $\text{CDCl}_3$ )  $\delta$  7.34 (d,  $J = 4.0$  Hz, 5H), 6.72 (d,  $J = 8.3$  Hz, 1H), 5.51 (d,  $J = 7.7$  Hz, 1H), 5.10 (s, 2H), 4.59 (td,  $J = 8.7, 4.2$  Hz, 1H), 4.32 (q,  $J = 7.5$  Hz, 1H), 3.69 (s, 3H), 1.58 (dq,  $J = 33.7, 8.6$  Hz, 3H), 1.38 (d,  $J = 7.0$  Hz, 3H), 0.91 (d,  $J = 5.6$  Hz, 6H).

**$^{13}\text{C}$  NMR** (400 MHz,  $\text{CDCl}_3$ )  $\delta$  173.4, 172.3, 156.1, 136.3, 128.7, 128.3, 128.1, 77.5, 77.2, 76.8, 67.1, 52.4, 50.8, 50.5, 41.4, 24.9, 22.9, 21.9, 18.8. The data are identical to the literature report.<sup>19</sup>

### Synthesis of Z-L-Ala-L-Asp-OMe (13)

Following the general procedure, L-Aspartic acid, 1,4-dimethyl ester, hydrochloride salt (20.0 mg, 100.0  $\mu\text{mol}$ ) was coupled with thioacid **2a** (24.0 mg, 100.0  $\mu\text{mol}$ ) to afford **13** (19.4 mg, 52.9  $\mu\text{mol}$ , 53% yield) as a white solid.  $R_f = 0.4$  (EtOAc: Hexane = 1:1)

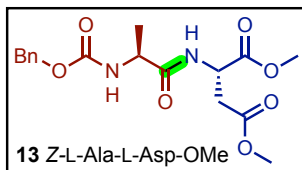

**$^1\text{H NMR}$**  (500 MHz,  $\text{CDCl}_3$ )  $\delta$  7.39 – 7.29 (m, 5H), 6.90 (d,  $J = 8.3$  Hz, 1H), 5.43 – 5.35 (m, 1H), 5.11 (s, 2H), 4.84 (dt,  $J = 8.9, 4.4$  Hz, 1H), 4.32 – 4.18 (m, 1H), 3.75 (s, 3H), 3.68 (s, 3H), 2.94 (ddd,  $J = 103.3, 17.3, 4.5$  Hz, 2H), 1.41 (d,  $J = 7.0$  Hz, 3H).

**$^{13}\text{C NMR}$**  (500 MHz,  $\text{CDCl}_3$ )  $\delta$  172.2, 171.6, 171.0, 128.7, 128.3, 128.2, 67.1, 53.0, 52.2, 50.6, 48.6, 36.0, 18.9. The data are identical to the literature report.<sup>17</sup>

#### Synthesis of Z-D-Ala-L-Ala-OMe (**14**)

Following the general procedure, L-alanine methyl ester hydrochloride salt (14.0 mg, 100.0  $\mu\text{mol}$ ) was coupled with thioacid **2b** (24.0 mg, 100.0  $\mu\text{mol}$ ) to afford **14** (20.7 mg, 67.0  $\mu\text{mol}$ , 67% yield) as a white solid.  $R_f = 0.4$  (EtOAc: Hexane = 1:1)

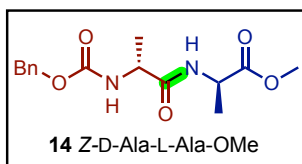

**$^1\text{H NMR}$**  (500 MHz,  $\text{CDCl}_3$ )  $\delta$  7.37 – 7.29 (m, 5H), 6.76 (s, 1H), 5.46 (t,  $J = 7.7$  Hz, 1H), 5.10 (q,  $J = 6.2$  Hz, 2H), 4.55 (q,  $J = 6.6$  Hz, 1H), 4.29 (q,  $J = 6.8$  Hz, 1H), 3.71 (d,  $J = 4.5$  Hz, 3H), 1.37 (t,  $J = 6.0$  Hz, 6H).

**$^{13}\text{C NMR}$**  (500 MHz,  $\text{CDCl}_3$ )  $\delta$  173.4, 172.0, 156.1, 136.3, 128.7, 128.3, 128.2, 67.2, 52.6, 50.5, 48.1, 18.7, 18.3. The data are identical to the literature report.<sup>12</sup>

#### Synthesis of Z-L-Phe-L-Ala-OMe (**15**)

Following the general procedure, L-alanine methyl ester hydrochloride salt (14.0 mg, 100.0  $\mu\text{mol}$ ) was coupled with thioacid **2c** (31.5 mg, 100.0  $\mu\text{mol}$ ) to afford **15** (21.9 mg, 57.3  $\mu\text{mol}$ , 57% yield) as a white solid.  $R_f = 0.4$  (EtOAc: Hexane = 1:1).

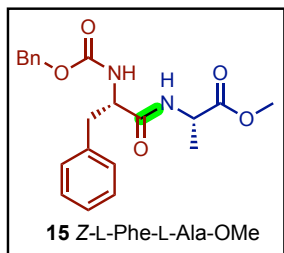

**$^1\text{H NMR}$**  (500 MHz,  $\text{CDCl}_3$ )  $\delta$  7.38 – 7.27 (m, 7H), 7.25 – 7.16 (m, 3H), 6.35 (d,  $J = 7.0$  Hz, 1H), 5.42 – 5.24 (m, 1H), 5.08 (s, 2H), 4.47 (dt,  $J = 20.2, 7.3$  Hz, 2H), 3.71 (s, 3H), 3.08 (qd,  $J = 13.8, 6.6$  Hz, 2H), 1.33 (d,  $J = 7.1$  Hz, 3H).

**$^{13}\text{C NMR}$**  (500 MHz,  $\text{CDCl}_3$ )  $\delta$  171.8, 171.8, 156.0, 136.3, 135.7, 129.4, 128.7, 128.7, 128.4, 128.2, 127.3, 77.4, 77.2, 76.9, 67.2, 53.3, 52.6, 50.5, 37.9, 18.5. The data are identical to the literature report.<sup>20</sup>

## Synthesis of Tripeptides:

### Synthesis of Z-L-Ala-L-Ala-L-Ala-OMe (16)

Following the general procedure, L-alanine-L-alanine methyl ester (17.2 mg, 100.0  $\mu\text{mol}$ ) was coupled with thioacid **2a** (23.9 mg, 100.0  $\mu\text{mol}$ ) to afford **16** (23.5 mg, 61.9  $\mu\text{mol}$ , 62% yield) as a white solid.  $R_f = 0.2$  (EtOAc: Hexane = 7:3)

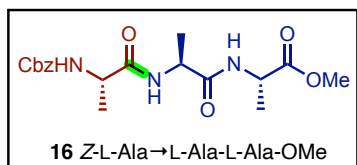

$^1\text{H NMR}$  (500 MHz,  $\text{CDCl}_3$ )  $\delta$  7.41 – 7.29 (m, 5H), 6.62 (d,  $J = 7.8$  Hz, 2H), 5.31 (d,  $J = 6.8$  Hz, 1H), 5.11 (d,  $J = 2.4$  Hz, 2H), 4.52 (dq,  $J = 31.6, 7.2$  Hz, 2H), 4.29 – 4.16 (m, 1H), 3.75 (s, 3H), 1.39 (q,  $J = 6.4$  Hz, 9H)

$^{13}\text{C NMR}$  (500 MHz,  $\text{CDCl}_3$ )  $\delta$  173.2, 172.2, 171.5, 156.1, 136.2, 128.7, 128.4, 128.3, 77.41, 77.16, 67.3, 52.7, 50.8, 49.0, 48.3, 29.8, 27.7, 18.7,

18.3. The data are identical to the literature report.<sup>21</sup>

### Synthesis of Z-D-Ala-L-Ala-L-Ala-OMe (17)

Following the general procedure, L-alanine-L-alanine methyl ester (17.2 mg, 100.0  $\mu\text{mol}$ ) was coupled with thioacid **2b** (23.9 mg, 100.0  $\mu\text{mol}$ ) to afford **17** (17.1 mg, 45.1  $\mu\text{mol}$ , 45% yield) as a white solid.  $R_f = 0.2$  (EtOAc: Hexane = 7:3)

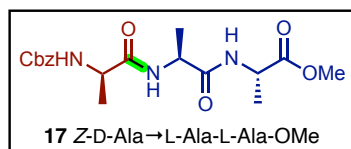

$^1\text{H NMR}$  (500 MHz,  $\text{CDCl}_3$ )  $\delta$  7.37 – 7.30 (m, 5H), 6.83 (d,  $J = 7.3$  Hz, 1H), 6.71 (d,  $J = 7.7$  Hz, 1H), 5.43 (d,  $J = 7.3$  Hz, 1H), 5.10 (q,  $J = 12.2$  Hz, 2H), 4.57 – 4.48 (m, 2H), 4.27 – 4.19 (m, 1H), 3.72 (s, 3H), 1.38 (d,  $J = 7.0$  Hz, 9H).

$^{13}\text{C NMR}$  (500 MHz,  $\text{CDCl}_3$ )  $\delta$  173.2, 172.3, 171.6, 156.2, 136.2, 128.7, 128.4, 128.3, 67.3, 52.6, 50.8, 48.9, 48.2, 18.6, 18.3, 18.2. The data are identical to the literature report.<sup>22</sup>

### Synthesis of Z-L-Phe-L-Ala-L-Ala-OMe (18)

Following the general procedure, L-alanine-L-alanine methyl ester (17.4 mg, 100.0  $\mu\text{mol}$ ) was coupled with thioacid **2c** (31.3 mg, 100.0  $\mu\text{mol}$ ) to afford **18** (26.4 mg, 57.9  $\mu\text{mol}$ , 58% yield) as a white solid.  $R_f = 0.2$  (EtOAc: Hexane = 7:3)

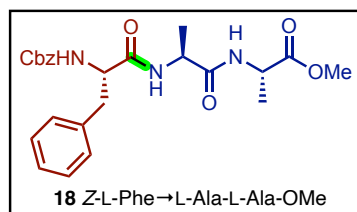

$^1\text{H NMR}$  (500 MHz,  $\text{CDCl}_3$ )  $\delta$  7.37 – 7.26 (m, 6H), 7.26 – 7.19 (m, 2H), 7.17 – 7.14 (m, 2H), 6.87 (d,  $J = 7.4$  Hz, 1H), 6.68 (d,  $J = 7.5$  Hz, 1H), 5.50 (d,  $J = 7.7$  Hz, 1H), 5.10 – 5.02 (m, 2H), 4.50 (p,  $J = 7.1$  Hz, 3H), 3.72 (s, 3H), 3.07 (d,  $J = 6.7$  Hz, 2H), 1.34 (dd,  $J = 24.2, 7.1$  Hz, 6H).

$^{13}\text{C NMR}$  (500 MHz,  $\text{CDCl}_3$ )  $\delta$  173.2, 171.4, 170.9, 129.4, 128.8, 128.7, 128.4, 128.2, 67.2, 52.6, 48.9, 48.2, 18.5, 18.3. The data are identical to

the literature report.<sup>15</sup>

## Scope of aryl thiocarboxylic acids:

### Synthesis of Methyl(4-methoxybenzoyl)-L-alaninate (19)

Following the general procedure, L-alanine methyl ester hydrochloride salt (14.0 mg, 100.0  $\mu\text{mol}$ ) was coupled with thioacid **2e** (16.8 mg, 100.0  $\mu\text{mol}$ ) to afford **19** (19.0 mg, 80.0  $\mu\text{mol}$ , 80% yield) as a white solid.  $R_f = 0.2$  (EtOAc: Hexane = 3:7)

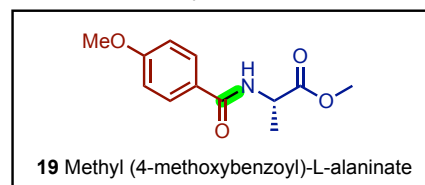

$^1\text{H NMR}$  (500 MHz,  $\text{CDCl}_3$ )  $\delta$  7.81 – 7.73 (m, 2H), 6.96 – 6.89 (m, 2H), 6.65 (d,  $J = 7.3$  Hz, 1H), 4.79 (p,  $J = 7.2$  Hz, 1H), 3.85 (s, 3H), 3.79 (s, 3H), 1.51 (d,  $J = 7.1$  Hz, 3H).

$^{13}\text{C NMR}$  (500 MHz,  $\text{CDCl}_3$ )  $\delta$  174.0, 166.4, 162.5, 129.0, 126.3, 113.9, 55.5, 52.7, 48.5, 18.9. The data are identical to the literature

report.<sup>23</sup>

### Synthesis of Methyl benzoyl-L-alaninate (**20**)

Following the general procedure, L-alanine methyl ester hydrochloride salt (14.0 mg, 100.0  $\mu\text{mol}$ ) was coupled with thioacid **2f** (13.8 mg, 100.0  $\mu\text{mol}$ ) to afford **20** (15.1 mg, 73.0  $\mu\text{mol}$ , 73% yield) as a white solid.  $R_f = 0.2$  (EtOAc: Hexane = 3:7)

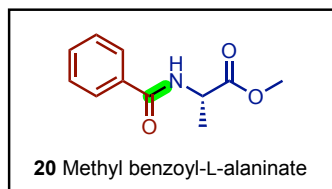

$^1\text{H NMR}$  (500 MHz,  $\text{CDCl}_3$ )  $\delta$  7.81 (dq,  $J = 7.1, 1.4$  Hz, 2H), 7.55 – 7.41 (m, 3H), 6.81 – 6.72 (m, 1H), 4.81 (pd,  $J = 7.2, 1.4$  Hz, 1H), 3.79 (d,  $J = 1.4$  Hz, 3H), 1.53 (dd,  $J = 7.1, 1.4$  Hz, 3H).

$^{13}\text{C NMR}$  (500 MHz,  $\text{CDCl}_3$ )  $\delta$  173.9, 166.9, 134.0, 131.9, 128.7, 127.2, 52.7, 48.6, 18.8. The data are identical to the literature report.<sup>24</sup>

### Synthesis of Methyl(4-bromobenzoyl)-L-alaninate (**21**)

Following the general procedure, L-alanine methyl ester hydrochloride salt (14.0 mg, 100  $\mu\text{mol}$ ) was coupled with thioacid **2g** (21.7 mg, 100  $\mu\text{mol}$ ) to afford **21** (20.3 mg, 71.0  $\mu\text{mol}$ , 71% yield) as a white solid.  $R_f = 0.2$  (EtOAc: Hexane = 3:7)

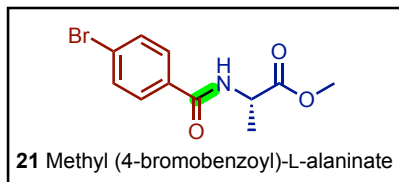

$^1\text{H NMR}$  (500 MHz,  $\text{CDCl}_3$ )  $\delta$  7.67 (d,  $J = 8.4$  Hz, 2H), 7.60 – 7.55 (m, 2H), 6.74 (d,  $J = 7.3$  Hz, 1H), 4.78 (t,  $J = 7.2$  Hz, 1H), 3.79 (s, 3H), 1.52 (d,  $J = 7.1$  Hz, 3H)

$^{13}\text{C NMR}$  (500 MHz,  $\text{CDCl}_3$ )  $\delta$  173.7, 165.9, 132.8, 131.9, 128.8, 126.6, 52.8, 48.6, 18.7. The data are identical to the literature report.<sup>25</sup>

### Synthesis of Methyl(4-trifluoromethyl)-L-alaninate (**22**)

Following the general procedure, L-alanine methyl ester hydrochloride salt (14.0 mg, 100.0  $\mu\text{mol}$ ) was coupled with thioacid **2h** (20.6 mg, 100.0  $\mu\text{mol}$ ) to afford **22** (13.0 mg, 47.2  $\mu\text{mol}$ , 47% yield) as a white solid.  $R_f = 0.2$  (EtOAc: Hexane = 3:7)

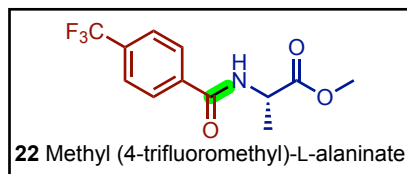

$^1\text{H NMR}$  (500 MHz,  $\text{CDCl}_3$ )  $\delta$  7.92 (d,  $J = 7.9$  Hz, 2H), 7.71 (d,  $J = 7.9$  Hz, 2H), 6.80 (d,  $J = 7.3$  Hz, 1H), 4.81 (td,  $J = 7.2, 1.8$  Hz, 1H), 3.81 (d,  $J = 1.9$  Hz, 3H), 1.54 (dd,  $J = 7.2, 1.9$  Hz, 3H).

$^{13}\text{C NMR}$  (500 MHz,  $\text{CDCl}_3$ )  $\delta$  173.7, 165.6, 127.7, 125.8, 125.8, 125.8, 125.7, 52.9, 48.8, 18.7. The data are identical to the literature report.<sup>26</sup>

### Synthesis of Methyl(4-nitrobenzoyl)-L-alaninate (**23**)

Following the general procedure, L-alanine methyl ester hydrochloride salt (14.0 mg, 100.0  $\mu\text{mol}$ ) was coupled with thioacid **2i** (18.3 mg, 100.0  $\mu\text{mol}$ ) to afford **23** (9.83 mg, 39.0  $\mu\text{mol}$ , 39% yield) as a yellow solid.  $R_f = 0.2$  (EtOAc: Hexane = 3:7)

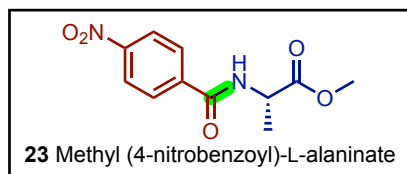

$^1\text{H NMR}$  (500 MHz,  $\text{CDCl}_3$ )  $\delta$  8.30 (dq,  $J = 9.2, 2.6$  Hz, 2H), 8.02 – 7.93 (m, 2H), 6.85 (s, 1H), 4.80 (qd,  $J = 7.2, 2.4$  Hz, 1H), 3.82 (d,  $J = 2.5$  Hz, 3H), 1.56 (dd,  $J = 7.2, 2.3$  Hz, 3H).

$^{13}\text{C NMR}$  (500 MHz,  $\text{CDCl}_3$ )  $\delta$  173.5, 164.9, 139.6, 128.4, 124.0, 53.0, 48.9, 18.7. The data are identical to the literature report.<sup>27</sup>

## Mechanistic Studies:

### Synthesis of Z-L-Ala-NH-Bn (24)

Following the general procedure, benzyl amine (10.7 mg, 100.0  $\mu\text{mol}$ ) was coupled with thioacid **2a** (24.0 mg, 100.0  $\mu\text{mol}$ ) to afford **24** (26.2 mg, 84.0  $\mu\text{mol}$ , 84% yield) as a white solid.  $R_f = 0.2$  (EtOAc: Hexane = 3:7)

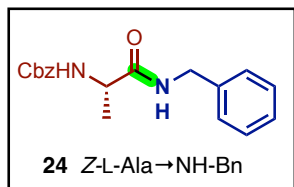

$^1\text{H NMR}$  (500 MHz,  $\text{CDCl}_3$ )  $\delta$  7.38 – 7.26 (m, 8H), 7.25 (d,  $J = 9.3$  Hz, 2H), 6.37 (s, 1H), 5.31 (s, 1H), 5.08 (d,  $J = 1.9$  Hz, 2H), 4.44 (t,  $J = 5.5$  Hz, 2H), 4.28 – 4.23 (m, 1H), 1.41 (d,  $J = 7.1$  Hz, 3H).

$^{13}\text{C NMR}$  (500 MHz,  $\text{CDCl}_3$ )  $\delta$  172.2, 156.1, 138.0, 136.2, 128.9, 128.73, 128.4, 128.2, 127.8, 127.7, 67.2, 50.8, 46.0, 43.7, 18.7, 8.7. The data are identical to the literature report.<sup>28</sup>

### Synthesis of Z-L-Ala-TEMPO (25)

Following the general procedure, TEMPO was coupled with thioacid **2a** (24.0 mg, 100.0  $\mu\text{mol}$ ) to afford **25** (29.0 mg, 80.0  $\mu\text{mol}$ , 80% yield) as a white solid.  $R_f = 0.2$  (EtOAc: Hexane = 3:7)

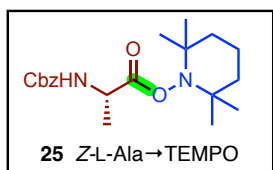

$^1\text{H NMR}$  (500 MHz,  $\text{CDCl}_3$ )  $\delta$  7.37 – 7.29 (m, 5H), 5.42 (d,  $J = 7.8$  Hz, 1H), 5.11 (s, 2H), 4.45 (p,  $J = 7.3$  Hz, 1H), 1.66 (p,  $J = 13.2$  Hz, 3H), 1.57 – 1.36 (m, 6H), 1.10 (d,  $J = 50.2$  Hz, 12H).

$^{13}\text{C NMR}$  (500 MHz,  $\text{CDCl}_3$ )  $\delta$  172.8, 155.6, 136.4, 128.6, 128.3, 128.2, 67.0, 60.4, 49.0, 39.2, 39.1, 32.0, 31.8, 20.6, 20.5, 19.3, 17.0.

LRMS<sup>16</sup>: calc. for  $\text{C}_{20}\text{H}_{31}\text{N}_2\text{O}_4$  (M+H): 363.23; found: 363.33

## Procedure for the experiments to understand the reactivity of the TEMPO-adduct and diacyl disulfide

TEMPO-adduct vs disulfide; a plausible reaction intermediate

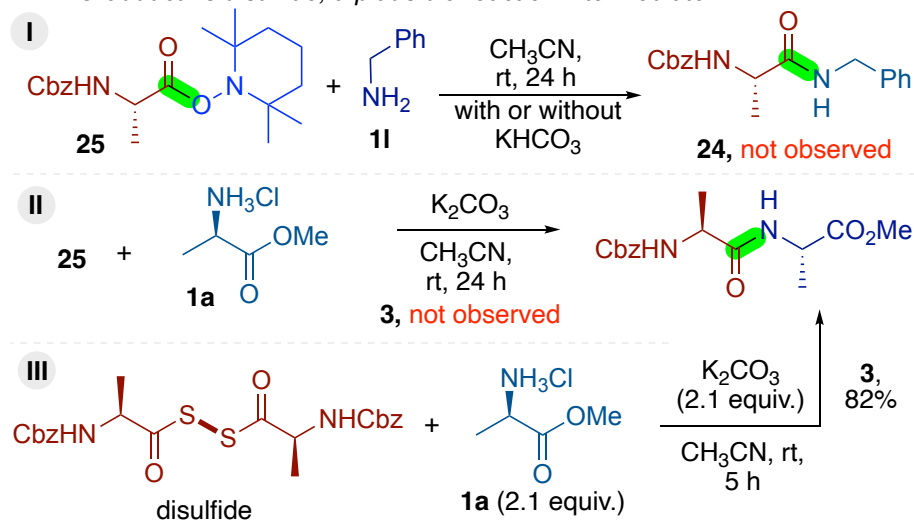

- I.** In an oven-dried vial charged with a magnetic stir bar, TEMPO-adduct **20** (1.0 equiv.) and benzylamine (1.0 equiv.) were dissolved in  $\text{CH}_3\text{CN}$ . Then, to this solution,  $\text{KHCO}_3$  (1.0 equiv.) was added, and the reaction was stirred at room temperature for the next 24 hours. After stirring for 24 hours starting material remained unreactive. The  $^1\text{H-NMR}$  analysis of the crude reaction mixture further confirmed the presence of starting materials.

**Note:** Reaction was also performed without  $\text{KHCO}_3$ , and the starting materials remained unreactive.

- II. In an oven-dried vial charged with a magnetic stir bar, TEMPO-adduct **20** (1.0 equiv.) and L-alanine methyl ester hydrochloride (1.0 equiv.) were dissolved in CH<sub>3</sub>CN. Then, to this solution, K<sub>2</sub>CO<sub>3</sub> (1.0 equiv.) was added, and the reaction was stirred at room temperature for the next 24 hours. After stirring for 24 hours starting material remained unreactive. The <sup>1</sup>H-NMR analysis of the crude reaction mixture further confirmed the presence of starting materials.
- III. In an oven-dried vial charged with a magnetic stir bar, L-Alanine diacyl disulfide (1.0 equiv.) and L-alanine methyl ester hydrochloride (2.1 equiv.) were dissolved in CH<sub>3</sub>CN. Then, to this solution, K<sub>2</sub>CO<sub>3</sub> (2.1 equiv.) was added, and the reaction was stirred at room temperature. The reaction progress was monitored by TLC, after stirring for 5 hours at room temperature, complete consumption of diacyl disulfide was observed. Reaction was diluted by adding ethyl acetate, and the organic layer was washed with brine. The combined organic layers were dried over anhydrous Na<sub>2</sub>SO<sub>4</sub>, filtered, and evaporated under reduced pressure to afford viscous crude material. The crude material was purified by column chromatography to produce **3** (82%) as a white solid.

### Reactivity of nucleophilicity of aliphatic and aromatic amines

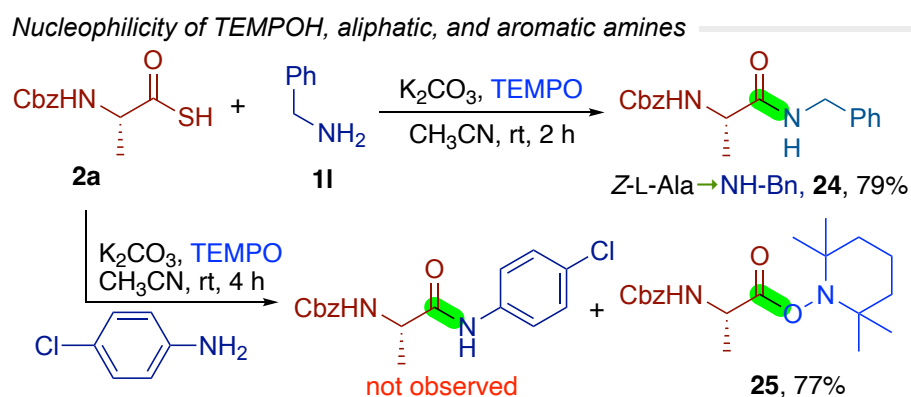

**With Aliphatic amine:** In an oven-dried vial charged with a magnetic stir bar, L-ala-SH **2a** (1.5 equiv.), benzyl amine (1.0 equiv.), and TEMPO (1.0 equiv.) were dissolved in CH<sub>3</sub>CN. Then, to this solution, K<sub>2</sub>CO<sub>3</sub> (1.0 equiv.) was added, and the reaction was stirred at room temperature for 2 hours. The reaction progress was monitored by TLC upon complete consumption of both starting materials. Reaction was diluted by adding ethyl acetate, and the organic layer was washed with brine. The combined organic layers were dried over anhydrous Na<sub>2</sub>SO<sub>4</sub>, filtered, and evaporated under reduced pressure to afford viscous crude material. The crude material was purified by column chromatography to produce **19** (79%) as a white solid.

**With Aromatic amine:** In an oven-dried vial charged with a magnetic stir bar, L-ala-SH **2a** (1.5 equiv.), 4-chloro aniline (1.0 equiv.), and TEMPO (1.0 equiv.) were dissolved in CH<sub>3</sub>CN. Then, to this solution, K<sub>2</sub>CO<sub>3</sub> (1.0 equiv.) was added, and the reaction was stirred at room temperature for 4 hours. The reaction progress was monitored by TLC upon complete consumption of both starting materials. Reaction was diluted by adding ethyl acetate, and the organic layer was washed with brine. The combined organic layers were dried over anhydrous Na<sub>2</sub>SO<sub>4</sub>, filtered, and evaporated under reduced pressure to afford viscous crude material. The crude material was purified by column chromatography to produce exclusively byproduct TEMPO adduct **20** (79%) as a white solid.

**Note:** This outcome indicates that the in situ formed TEMPOH is more nucleophilic than 4-chloroaniline and shows excellent competitive reactivity with diacyl disulfide. Whereas despite in excess 4-chloroaniline did not engage with diacyl disulfide.

## Physical Observations of the Reaction Mixtures:

Physical appearance of the reaction mixture was observed to change from bright orange to colorless (Figure S3-A and B). Separately, Thioacid + TEMPO, TEMPO +  $K_2CO_3$ , and thioacid +  $K_2CO_3$  combinations were observed. More specifically, in the case of thioacid + TEMPO, a significant color change was observed. While the initial color was bright yellow/orange (Figure S3-C, left vial), after 2 hours bright color faded (Figure S3-D, left vial), and eventually the color disappeared (Figure S3-E, left vial). These color changes strongly suggested the disproportionation of TEMPO under thioacid conditions. More specifically, the oxoammonium ion ( $TEMPO^+$ ) and TEMPOH are formed; this oxoammonium ion further oxidizes thioacid to diacyl disulfide. In the case of the other two combinations, no color change was observed; instead, some turbidity formation was seen.

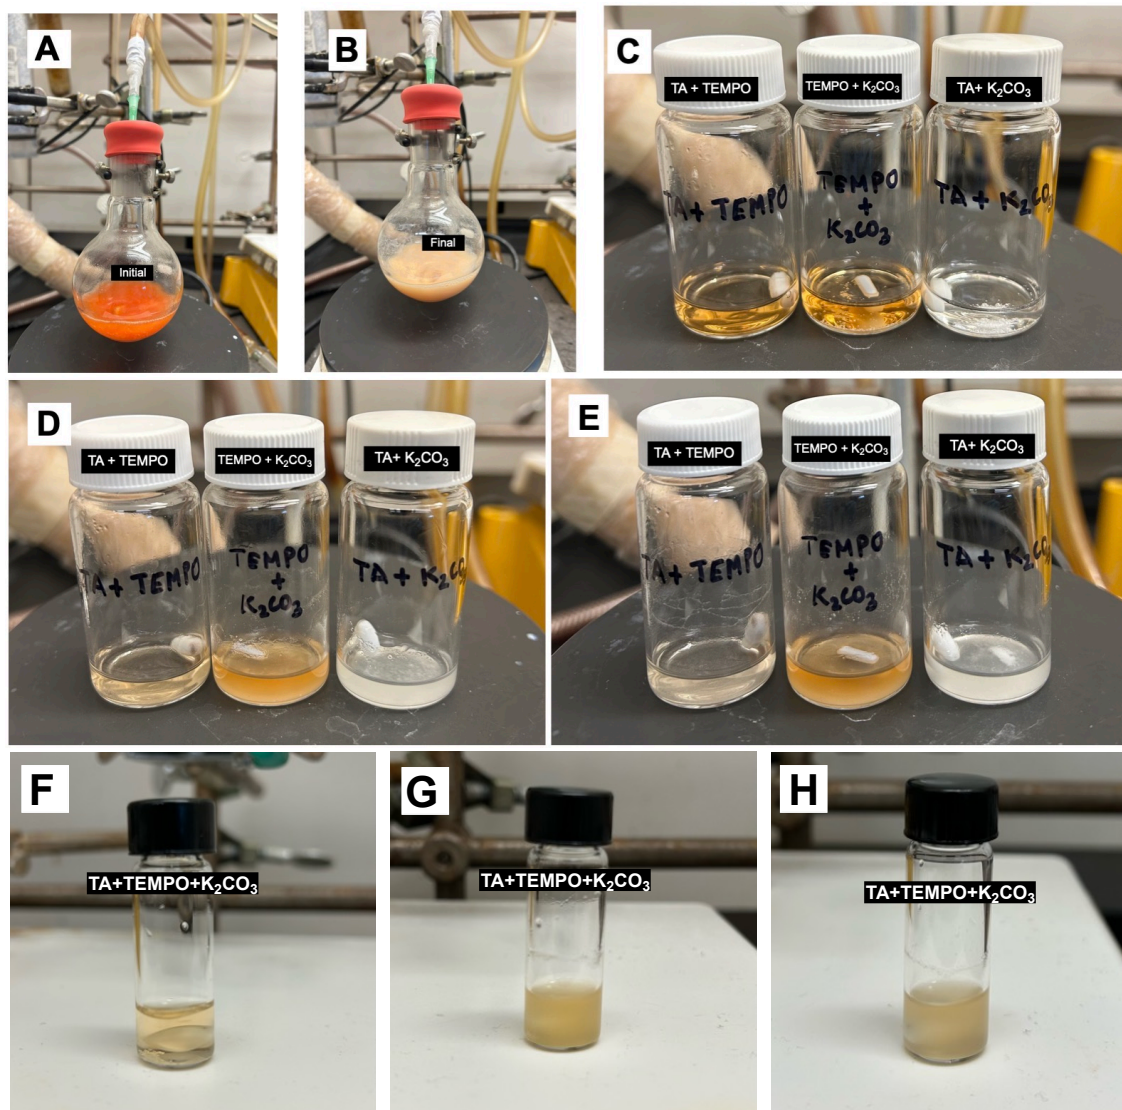

**Figure S3:** **A:** Initial color of the reaction mixture (for gram-scale) having thioacid (TA), amino acid hydrochloride, TEMPO, and  $K_2CO_3$  **B:** Final color of the reaction mixture (for gram-scale) having thioacid (TA), amino acid hydrochloride, TEMPO, and  $K_2CO_3$  **C:** Color of the reaction mixtures at  $t = 0$  having TA + TEMPO, TEMPO +  $K_2CO_3$  and TA +  $K_2CO_3$  **D:** Color of the reaction mixtures at  $t = 120$  minutes having TA + TEMPO, TEMPO +  $K_2CO_3$  and TA +  $K_2CO_3$  **E:** Color of the reaction mixtures at  $t = 240$  mins having TA + TEMPO, TEMPO +  $K_2CO_3$  and TA +  $K_2CO_3$  **F:** Color of the reaction mixture at  $t=0$  mins having TA + TEMPO +  $K_2CO_3$  **G:** Color of the reaction mixture at  $t=180$  mins having TA + TEMPO +  $K_2CO_3$  **H:** Color of the reaction mixture at  $t=360$  mins having TA + TEMPO +  $K_2CO_3$ .

## UV-Visible Studies of the Starting Materials and Reaction Mixtures

**Spectra a:** Stock solutions (0.1 M) were prepared in acetonitrile for all the starting materials, such as thioacid, thioacid+K<sub>2</sub>CO<sub>3</sub>, and TEMPO. These solutions were further diluted to 0.01 M before performing UV analysis.

**Spectra b:** The molarity of reaction mixtures was 0.1M in acetonitrile, and it was diluted to 0.01M before performing UV analysis. In the reaction mixture after 2.5 hours the TEMPO absorbance peak was observed to be reduced, confirming the consumption of TEMPO.<sup>29</sup>

**Spectra c:** A subtracted spectrum for the reaction mixture, final and initial, clearly indicated the appearance of a new absorbance peak at around 420-430 nm which is distinct than the original peak of TEMPO.

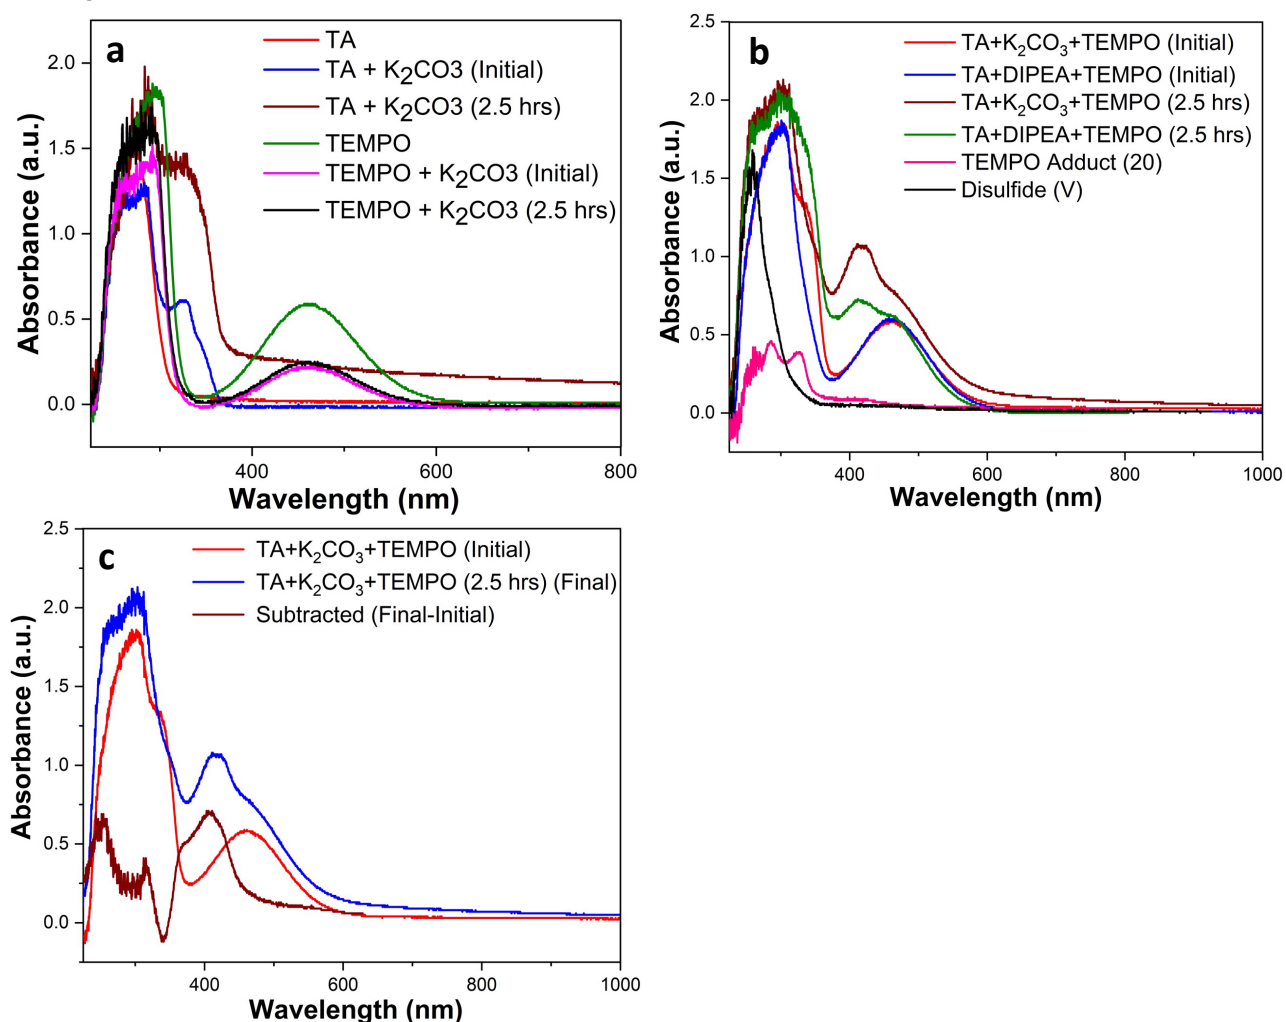

**Figure S4:** UV-Visible studies. **a)** UV-Visible studies of the starting materials, **b)** UV-Visible studies of the reaction mixture (initial and final), TEMPO-adduct, and diacyl disulfide, **c)** Subtracted spectra of the reaction mixture (final and initial).

## Cyclic Voltammetry study for thioacetate and TEMPO

We performed the cyclic voltammetry studies for both thioacetate and the oxidant. The oxidation potential of thioacetate was observed to be 0.246V (vs Ferrocene), and the reduction potential of TEMPO was observed to be -1.37V (vs Ferrocene). Experimentally, the free energy for an outer-sphere electron transfer was found to be +37.4 kcal/mol. These values suggest that this process is non-spontaneous and requires external energy to occur. Hence, the single electron transfer (SET) between thioacetate and TEMPO is highly unlikely and eliminates any possibility of a direct SET process between them. More specifically, it also indicates a reaction pathway highly likely to occur via the formation of a reactive activator, possibly the oxoammonium ion.

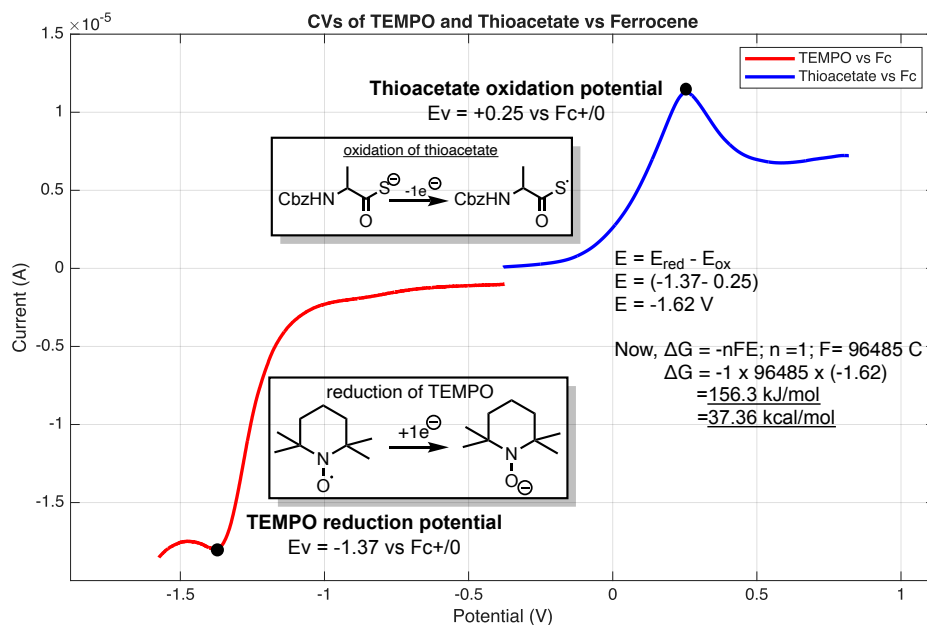

**Figure S5.** Cyclic voltammetry of thioacetate (oxidation) and TEMPO (reduction).

## Plausible, detailed mechanistic pathway(s)

### Possibility 1

Based on our mechanistic findings and literature precedents<sup>30-32</sup>, we propose the pathway depicted in **Figure S6**. First, under standard reaction conditions, TEMPO disproportionates to TEMPO<sup>+</sup> and TEMPOH (Figure S7, SI).<sup>30-32</sup> Then, the sequence begins with base-assisted deprotonation of thioacid **2** to generate thioacetate intermediate **I**. This nucleophile can engage the oxoammonium species (TEMPO<sup>+</sup>, **II**) through two plausible routes to form the intermediate diacyl disulfide **IV**. In path **I**, thioacetate **I** attacks the nitrogen center of **II**, producing the transient quaternary ammonium intermediate **int-I**. A second thioacetate then attacks at sulfur, releasing TEMPO<sup>-20</sup> and furnishing diacyl disulfide **IV**. In path **II**, thioacetate **I** attacks the oxygen atom of **II**, generating the oxygen-bound intermediate **int-II**. Subsequent nucleophilic attack by another thioacetate at the sulfur center again affords TEMPO<sup>-20</sup> and diacyl disulfide **IV**, which then undergoes aminolysis with the amine to yield the peptide product. Notably, TEMPO<sup>-20</sup> is rapidly protonated to TEMPOH, and TEMPO itself can undergo disproportionation under the reaction conditions.

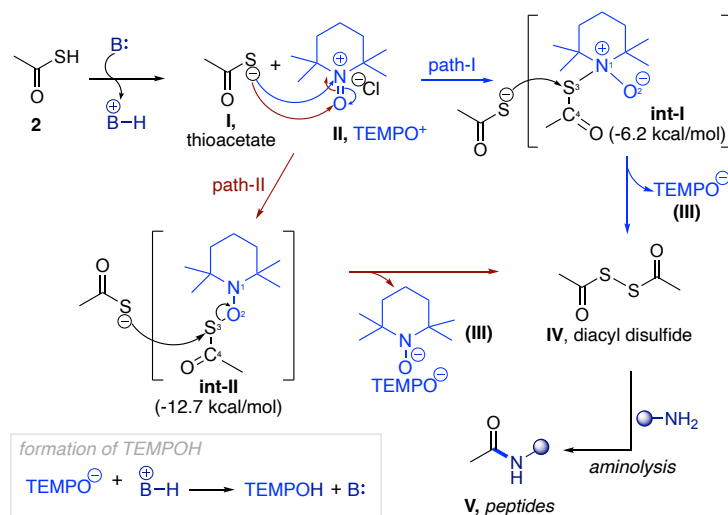

**Figure S6.** Detailed, Plausible Mechanistic pathway (s) for this transformation via oxoammonium ion.

To further elucidate the mechanistic landscape, we conducted density functional theory (DFT) calculations. The results show that **int-II** is 6.5 kcal/mol more stable than **int-I**, indicating a thermodynamic preference for **path-II**. Next, to understand the site of nucleophilic attack by thioacetate **I**, we evaluated the electrophilicity of all four reactive centers using Fukui functions (**Figure S8**, SI). In both intermediates, the sulfur atom (S<sup>3</sup>) was calculated as the most electrophilic site, making it the preferred position for nucleophilic attack. This analysis strongly supports our proposed formation of the diacyl disulfide **IV** as a key mechanistic intermediate.

### Possibility 2

After an important suggestion by Reviewer 2 and performing experiments, we proposed another pathway (**Figure S7**). The reaction initiated by the interaction of thioacid **2** and TEMPO leads to the formation of thioketyl radical **II** and TEMPOH **I**. The thioketyl radical **I** further interact with another molecule of TEMPO and forms a transient intermediate **III**, which further fragments into intermediate **IV** and tetramethyl piperidine **V**. Then, the intermediate **IV** reacts with another molecule of thioacid and produces diacyl disulfide **VI**, which, upon aminolysis, forms a peptide and species **VIII**, which can protonate tetramethyl piperidinium salt **IX**.

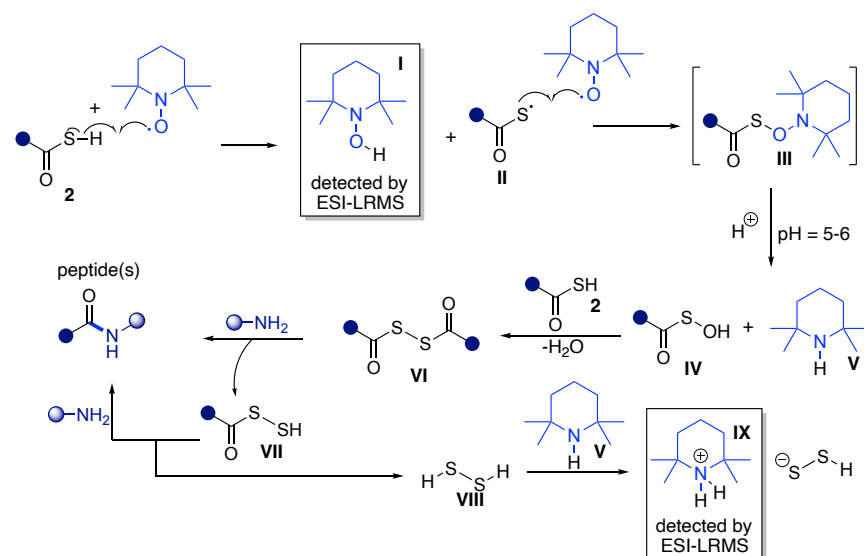

**Figure S7.** Mechanistic pathway initiated by the formation of thioketyl radical via TEMPO.

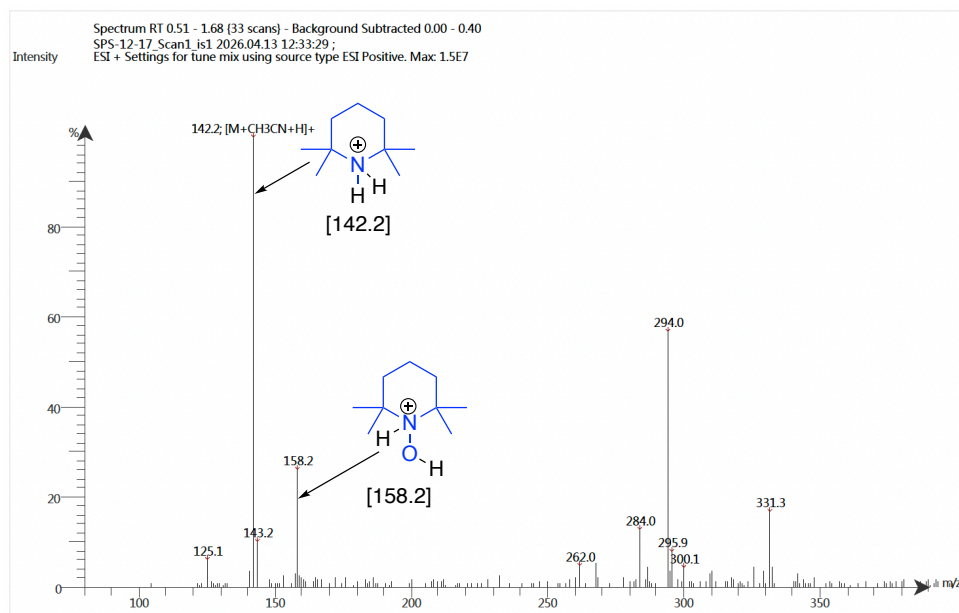

**Figure S8.** ESI-LRMS analysis of the reaction mixture for the synthesis of 3.

### Thiocarboxylic acid and amine coupling using Bobbitt's salt as a coupling agent.

In an oven-dried vial charged with a magnetic stir bar, L-ala-SH **2a** (1.5 equiv.), L-alanine methyl ester hydrochloride (1.0 equiv.), and Bobbitt's salt (1.0 equiv.) were dissolved in CH<sub>3</sub>CN. Then, to this solution, K<sub>2</sub>CO<sub>3</sub> (1.0 equiv.) was added, and the reaction was stirred at room temperature for 6 hours. The reaction progress was monitored by TLC upon complete consumption of both starting materials. Reaction was diluted by adding ethyl acetate, and the organic layer was washed with brine. The combined organic layers were dried over anhydrous Na<sub>2</sub>SO<sub>4</sub>, filtered, and evaporated under reduced pressure to afford viscous crude material. The crude material was purified by column chromatography to produce **3** (54%) as a white solid.

## Computational Studies:

All computations were performed using density functional theory (DFT) as implemented in the *Gaussian 16*<sup>33</sup> software package at the 6-31G(d) level of theory with the B3LYP hybrid exchange-correlation functional<sup>34</sup>. This level of theory was chosen due to its relatively high accuracy and low computational cost. Solvent effects were treated implicitly using the PCM solvent model<sup>35</sup> for MeCN. Dispersion was treated using Grimme's D3-BJ<sup>36</sup> dispersion correction. All stationary points were analyzed using Hessian vibrational analysis and confirmed as either intermediates (zero imaginary vibrational frequencies and a zero gradient) or transition states (exactly one physically relevant, imaginary vibrational frequency). See attached txt file for XYZ coordinates, electronic energies, and relevant frequencies of all optimized geometries. All transition states were discovered using relaxed potential energy surface scans. Molecular structures were visualized in the *GaussView* molecular viewer. Thermodynamic parameters were calculated using the FREQ keyword.

### Calculation of $K_{eq}$ for TEMPO disproportionation reaction:

It is well known that TEMPO can readily disproportionate under acidic or oxidizing conditions, generating **TEMPO<sup>+</sup>** and **TEMPO<sup>-</sup>**. Since our reaction condition is slightly acidic due to the presence of the thioacid, we propose that an equilibrium like that shown in **Figure S6** exists. To probe the equilibrium constant ( $K_{eq}$ ) for the disproportionation reaction of TEMPO to **TEMPO<sup>+</sup>** and **TEMPO<sup>-</sup>**, the Gibbs Free Energy of the respective species **TEMPO**, **TEMPO<sup>+</sup>**, and **TEMPO<sup>-</sup>** is calculated by DFT calculations using the above level of theory. Then those values are used in the formula mentioned below:

$$K_{eq} = e^{-\Delta G/RT}, \text{ where } R = 1.9 \times 10^{-3} \text{ kcal/mol and } T = 298K$$

$$\Delta G = \sum G_{\text{Products}} - \sum G_{\text{Reactants}} = (G_{\text{TEMPO}_{\text{Cation}}} + G_{\text{TEMPO}_{\text{Anion}}}) - 2 * G_{\text{TEMPO}}$$

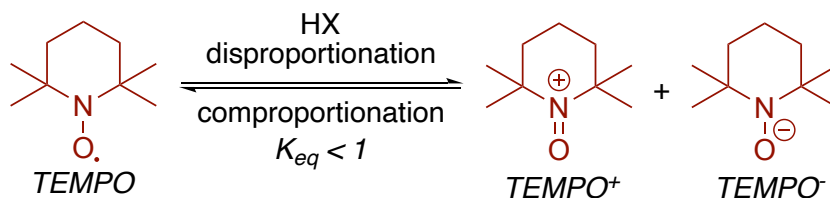

**Figure S9:** Disproportionation reaction of TEMPO.

### Calculation of Fukui Function:

To find out the most electrophilic site on the intermediates (i.e., **int-I** and **int-II**), the electrophilic Fukui function was calculated by the formula:

$$f_+(r) = \rho_{N+1}(r) - \rho_N(r)$$

For the above calculations, we considered the ESP charges of the anionic and neutral centers and then subtracted the charge of the neutral center from that of the anionic one. For the next step to occur, the thioacetate anion (i.e., the nucleophile) should attack the most electropositive site of the molecule. The calculation showed that for both intermediates (i.e., **int-I** and **int-II**), the S-atom was the most electropositive center, indicating that the second nucleophilic attack occurs at the sulfur center, which in turn produces the disulfide as the product.

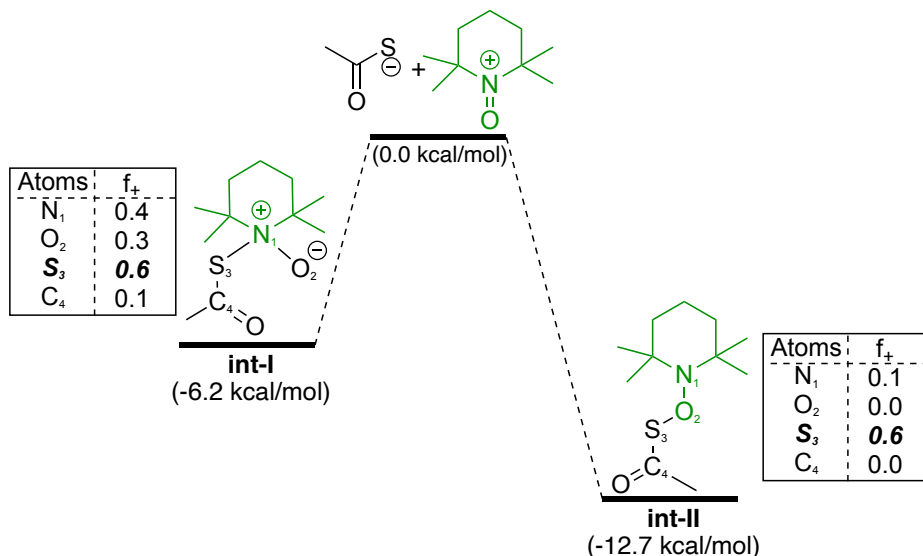

**Figure S10:** Energy Diagram showing the electrophilic Fukui functions and intermediates.

### Transition State Modeling

Relaxed potential energy surface scans were employed to identify the transition state connecting the starting materials (**SM**) and the major intermediate (**int-I**). We were able to identify a transition state (**TS-II**), which was confirmed by the presence of a single imaginary vibrational frequency. Due to the strong electrostatic attraction between the TEMPO<sup>+</sup> cation and the thioacetate anion, the exact quantification of this barrier is difficult; however, it is likely to be very small. We have presented the geometry, vibrational frequencies, and electronic energy of this intermediate in a separate text document for completeness. The existence of this intermediate further supports our mechanistic hypothesis.

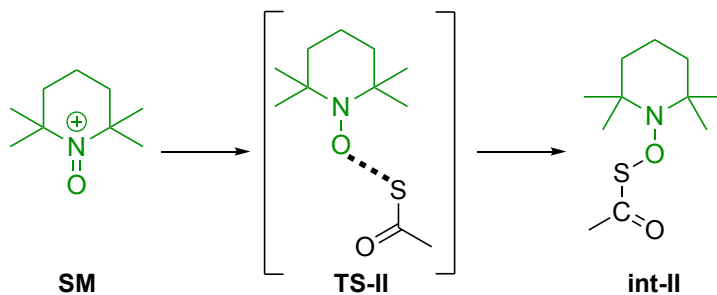

**Figure S11:** Prediction of the transition state by PES scans.

## XYZ coordinates and frequencies of the optimized structures:

All final geometries optimized and frequencies  
computed at *DFT B3LYP-B3(BJ) 6-31G(d) PCM(MeCN)* level of theory

\*\*\*\*\*

\* Stationary points along the minimum energy pathway \*

\*\*\*\*\*

### **Thioacetate Anion:**

**electronic energy:** -551.585534 Eh

**geometry:**

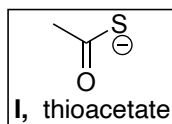

-1 1

|   |             |             |             |
|---|-------------|-------------|-------------|
| C | 0.37374100  | 0.21891300  | -0.00060000 |
| C | 1.32231100  | -0.98241200 | -0.00019000 |
| H | 1.15658200  | -1.60012800 | 0.88909400  |
| H | 1.13731700  | -1.61894600 | -0.87197300 |
| H | 2.36152700  | -0.63769900 | -0.01431100 |
| O | 0.85320700  | 1.35505200  | 0.00015100  |
| S | -1.35358700 | -0.15016500 | 0.00004500  |

### **Frequencies:**

|                |           |           |           |
|----------------|-----------|-----------|-----------|
| Frequencies -- | 16.2318   | 360.4980  | 488.3338  |
| Frequencies -- | 536.6452  | 660.4087  | 954.1980  |
| Frequencies -- | 1024.1888 | 1125.9728 | 1389.3908 |
| Frequencies -- | 1482.4673 | 1493.0631 | 1663.4491 |
| Frequencies -- | 3049.3834 | 3122.3614 | 3130.1108 |

\*\*\*\*\*

### **TEMPO<sup>+</sup>:**

**electronic energy:** -483.591143 Eh

**geometry:**

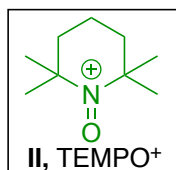

1 1

|   |             |             |             |
|---|-------------|-------------|-------------|
| C | 0.00114500  | 2.15377800  | -0.00342300 |
| H | 0.41483900  | 2.80515200  | -0.77722400 |
| H | -0.41068000 | 2.81071500  | 0.76664300  |
| C | -1.12365800 | 1.30996500  | -0.63581600 |
| H | -0.95510100 | 1.17664800  | -1.70800600 |
| H | -2.08228200 | 1.82776500  | -0.54446100 |
| C | 1.12373200  | 1.31060300  | 0.63366900  |
| H | 0.95279700  | 1.18024500  | 1.70582400  |
| H | 2.08285100  | 1.82769300  | 0.54328000  |
| C | 1.33037100  | -0.07639800 | 0.01304100  |
| C | -1.33030300 | -0.07589000 | -0.01166500 |
| C | -2.32829300 | -0.92225600 | -0.80439300 |
| H | -2.51154600 | -1.88654700 | -0.32860100 |
| H | -3.26974200 | -0.36946800 | -0.84331200 |
| H | -1.97839200 | -1.08388200 | -1.82772700 |
| C | -1.74585700 | -0.00146600 | 1.48086500  |
| H | -2.72837200 | 0.47787900  | 1.50161800  |
| H | -1.82883900 | -1.00466300 | 1.90475300  |
| H | -1.06083100 | 0.59184400  | 2.08623700  |

|   |             |             |             |
|---|-------------|-------------|-------------|
| C | 1.75028700  | -0.00544000 | -1.47816800 |
| H | 2.73297000  | 0.47361900  | -1.49760200 |
| H | 1.83399400  | -1.00954600 | -1.89976300 |
| H | 1.06683100  | 0.58677400  | -2.08654900 |
| C | 2.32399400  | -0.92292200 | 0.81119900  |
| H | 2.50618800  | -1.88905200 | 0.33878200  |
| H | 3.26669600  | -0.37233000 | 0.85123700  |
| H | 1.97068600  | -1.08044100 | 1.83404100  |
| O | -0.00071600 | -2.00357900 | -0.00531400 |
| N | -0.00069100 | -0.80765900 | -0.00121700 |

**Frequencies:**

|                |           |           |           |
|----------------|-----------|-----------|-----------|
| Frequencies -- | 21.1355   | 130.5190  | 156.4647  |
| Frequencies -- | 189.0318  | 201.1801  | 232.7792  |
| Frequencies -- | 258.7081  | 259.4839  | 275.2751  |
| Frequencies -- | 284.8314  | 340.8604  | 359.1866  |
| Frequencies -- | 368.9835  | 373.5139  | 397.9614  |
| Frequencies -- | 451.1833  | 465.6090  | 536.8676  |
| Frequencies -- | 575.6657  | 701.6855  | 733.0432  |
| Frequencies -- | 749.2985  | 793.6109  | 843.2744  |
| Frequencies -- | 887.6549  | 912.0112  | 938.1191  |
| Frequencies -- | 968.9575  | 973.3766  | 975.5547  |
| Frequencies -- | 998.9628  | 1025.2235 | 1039.0298 |
| Frequencies -- | 1087.9851 | 1113.5215 | 1128.8674 |
| Frequencies -- | 1138.7991 | 1178.9741 | 1218.5280 |
| Frequencies -- | 1258.4806 | 1274.1231 | 1280.4576 |
| Frequencies -- | 1282.0119 | 1314.9280 | 1393.0014 |
| Frequencies -- | 1396.3094 | 1417.3784 | 1421.2923 |
| Frequencies -- | 1423.3801 | 1449.0015 | 1450.2193 |
| Frequencies -- | 1489.5591 | 1494.6415 | 1504.2202 |
| Frequencies -- | 1504.4976 | 1512.0441 | 1516.2955 |
| Frequencies -- | 1523.1728 | 1531.7148 | 1532.3709 |
| Frequencies -- | 1536.7597 | 1542.6370 | 1717.6302 |
| Frequencies -- | 3081.4240 | 3081.7411 | 3085.7279 |
| Frequencies -- | 3086.7442 | 3088.7722 | 3089.8464 |
| Frequencies -- | 3096.7129 | 3119.1555 | 3128.6101 |
| Frequencies -- | 3140.6579 | 3158.7026 | 3158.9874 |
| Frequencies -- | 3164.3175 | 3164.4004 | 3176.6981 |
| Frequencies -- | 3176.8596 | 3189.3168 | 3190.1525 |

\*\*\*\*\*

**TEMPO<sup>-</sup> :**

**electronic energy:** -483.836736 Eh

**geometry:**

-1 1

|   |             |            |             |
|---|-------------|------------|-------------|
| C | 0.06335000  | 2.13028300 | 0.31428200  |
| H | 0.05832900  | 3.20513000 | 0.08707400  |
| H | 0.25404000  | 2.02928400 | 1.38859800  |
| C | -1.29105700 | 1.51111300 | -0.04644100 |
| H | -1.57878800 | 1.86293600 | -1.04676800 |
| H | -2.06238400 | 1.88479500 | 0.63959100  |
| C | 1.15155200  | 1.41067800 | -0.47712500 |

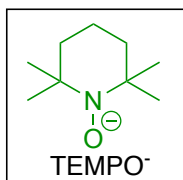

|   |             |             |             |
|---|-------------|-------------|-------------|
| H | 2.12510300  | 1.90700200  | -0.36170900 |
| H | 0.89803100  | 1.47630300  | -1.54471400 |
| C | -1.27285200 | -0.05135800 | -0.03776600 |
| C | 1.26659000  | -0.07126500 | -0.05115000 |
| C | 1.71282300  | -0.95410800 | -1.23260000 |
| H | 2.79272400  | -0.87971900 | -1.41409400 |
| H | 1.43998600  | -1.97713600 | -0.95526800 |
| H | 1.19782400  | -0.68934300 | -2.16177600 |
| C | -1.51017900 | -0.63002600 | -1.44942300 |
| H | -1.22813300 | -1.68674800 | -1.40852000 |
| H | -2.56069100 | -0.54358200 | -1.75906700 |
| H | -0.90004200 | -0.12507100 | -2.20569000 |
| C | -2.41019600 | -0.54649500 | 0.87198200  |
| H | -3.38359900 | -0.19114600 | 0.50938300  |
| H | -2.40011600 | -1.63662400 | 0.90870500  |
| H | -2.26229000 | -0.16766100 | 1.89112900  |
| C | 2.31310800  | -0.19939600 | 1.07319900  |
| H | 2.26551800  | -1.21710000 | 1.46998900  |
| H | 3.32945200  | 0.00825300  | 0.71313900  |
| H | 2.08436500  | 0.49611800  | 1.89001300  |
| O | -0.01684900 | -1.94873600 | 0.68246600  |
| N | -0.01048000 | -0.53748000 | 0.58721500  |

**Frequencies:**

|                |           |           |           |
|----------------|-----------|-----------|-----------|
| Frequencies -- | 32.3258   | 103.8545  | 201.5889  |
| Frequencies -- | 217.0742  | 236.8423  | 258.4500  |
| Frequencies -- | 262.5288  | 301.8318  | 312.2891  |
| Frequencies -- | 322.9180  | 349.5965  | 372.6824  |
| Frequencies -- | 380.9591  | 402.3653  | 415.6425  |
| Frequencies -- | 464.8328  | 480.6812  | 503.6952  |
| Frequencies -- | 578.8801  | 594.9263  | 663.8719  |
| Frequencies -- | 775.1677  | 779.4724  | 852.9710  |
| Frequencies -- | 892.0269  | 917.9234  | 930.4969  |
| Frequencies -- | 938.1147  | 954.5404  | 982.5179  |
| Frequencies -- | 987.8088  | 1001.0104 | 1036.4275 |
| Frequencies -- | 1047.2040 | 1062.7521 | 1077.0499 |
| Frequencies -- | 1109.1491 | 1148.7241 | 1196.6045 |
| Frequencies -- | 1229.2368 | 1239.3609 | 1255.7274 |
| Frequencies -- | 1265.5057 | 1278.3518 | 1326.6679 |
| Frequencies -- | 1358.4392 | 1366.4403 | 1377.2123 |
| Frequencies -- | 1382.3371 | 1390.0697 | 1395.2298 |
| Frequencies -- | 1400.0655 | 1490.8167 | 1494.8814 |
| Frequencies -- | 1503.6981 | 1508.7792 | 1515.9343 |
| Frequencies -- | 1520.7734 | 1521.3867 | 1524.1748 |
| Frequencies -- | 1532.2397 | 1535.0328 | 1541.5392 |
| Frequencies -- | 3012.8380 | 3016.8686 | 3021.6264 |
| Frequencies -- | 3023.2569 | 3029.7830 | 3031.5949 |
| Frequencies -- | 3036.3992 | 3045.9129 | 3051.2181 |
| Frequencies -- | 3083.4439 | 3084.1353 | 3087.1480 |
| Frequencies -- | 3088.7689 | 3100.0281 | 3121.9426 |
| Frequencies -- | 3126.0764 | 3128.8659 | 3156.9850 |

\*\*\*\*\*

**TEMPO:****electronic energy:** -483.773065 Eh**geometry:**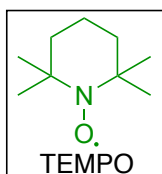

0 2

|   |             |             |             |
|---|-------------|-------------|-------------|
| C | 0.00024500  | 2.15331300  | 0.00016500  |
| H | 0.41875700  | 2.81098700  | -0.76882400 |
| H | -0.41779600 | 2.81153800  | 0.76893700  |
| C | -1.11638800 | 1.30399600  | -0.63757100 |
| H | -0.90539100 | 1.15235900  | -1.70182600 |
| H | -2.07241900 | 1.83666000  | -0.58959900 |
| C | 1.11638100  | 1.30352000  | 0.63805800  |
| H | 0.90501500  | 1.15151800  | 1.70218100  |
| H | 2.07252800  | 1.83603000  | 0.59062200  |
| C | 1.31242900  | -0.08276600 | 0.00215300  |
| C | -1.31243400 | -0.08252200 | -0.00221300 |
| C | -2.29997500 | -0.89357400 | -0.85039100 |
| H | -2.47676800 | -1.87811100 | -0.41436800 |
| H | -3.25191000 | -0.35594700 | -0.90666400 |
| H | -1.91659600 | -1.02869700 | -1.86684500 |
| C | 1.83234000  | 0.01008000  | -1.44479300 |
| H | 2.84230900  | 0.43413800  | -1.45317500 |
| H | 1.87169300  | -0.99043800 | -1.88665200 |
| H | 1.19442600  | 0.63842400  | -2.07176300 |
| C | 2.29935700  | -0.89441400 | 0.85044000  |
| H | 2.47637500  | -1.87869900 | 0.41394600  |
| H | 3.25128600  | -0.35687100 | 0.90762700  |
| H | 1.91534300  | -1.03012900 | 1.86657400  |
| C | -1.83163300 | 0.00954800  | 1.44503900  |
| H | -2.84166800 | 0.43343600  | 1.45404800  |
| H | -1.87065400 | -0.99120700 | 1.88639100  |
| H | -1.19360200 | 0.63768300  | 2.07207700  |
| O | -0.00027200 | -2.07955700 | -0.00035100 |
| N | -0.00009800 | -0.79418500 | -0.00074400 |

**Frequencies:**

|                |           |           |           |
|----------------|-----------|-----------|-----------|
| Frequencies -- | 48.9918   | 121.3039  | 147.9379  |
| Frequencies -- | 158.9631  | 214.0586  | 219.9413  |
| Frequencies -- | 255.8550  | 256.7512  | 280.3235  |
| Frequencies -- | 301.1738  | 325.9700  | 357.1640  |
| Frequencies -- | 360.1006  | 383.3120  | 385.8251  |
| Frequencies -- | 462.4682  | 467.4279  | 506.5534  |
| Frequencies -- | 540.0610  | 596.4674  | 704.9504  |
| Frequencies -- | 746.0731  | 821.0058  | 837.2822  |
| Frequencies -- | 886.3122  | 927.7868  | 950.9811  |
| Frequencies -- | 955.3224  | 986.5244  | 1002.8158 |
| Frequencies -- | 1002.8184 | 1028.9421 | 1045.1155 |
| Frequencies -- | 1093.1182 | 1110.3552 | 1144.2834 |
| Frequencies -- | 1168.9825 | 1216.1850 | 1217.6062 |
| Frequencies -- | 1260.0740 | 1276.7612 | 1284.6445 |
| Frequencies -- | 1309.2181 | 1327.8950 | 1384.7172 |
| Frequencies -- | 1393.0639 | 1408.4481 | 1417.2947 |
| Frequencies -- | 1418.7277 | 1427.5293 | 1437.5845 |

|                |           |           |           |
|----------------|-----------|-----------|-----------|
| Frequencies -- | 1455.7018 | 1498.5343 | 1502.7440 |
| Frequencies -- | 1508.1957 | 1509.7343 | 1513.3605 |
| Frequencies -- | 1514.2198 | 1520.7287 | 1528.5240 |
| Frequencies -- | 1532.1426 | 1533.0222 | 1536.6941 |
| Frequencies -- | 3055.1273 | 3057.2144 | 3058.9643 |
| Frequencies -- | 3059.1277 | 3064.3327 | 3066.0165 |
| Frequencies -- | 3071.0430 | 3084.4737 | 3096.5415 |
| Frequencies -- | 3108.9335 | 3127.3269 | 3127.6055 |
| Frequencies -- | 3131.3941 | 3131.8816 | 3144.1180 |
| Frequencies -- | 3144.2253 | 3160.3973 | 3160.6308 |

\*\*\*\*\*

**Int-II:**

**electronic energy:** -1035.209098 Eh

**geometry:**

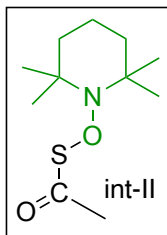

0 1

|   |             |             |             |
|---|-------------|-------------|-------------|
| C | 2.96731700  | 0.45515800  | -1.22327000 |
| H | 3.97587200  | 0.78221800  | -1.49970000 |
| H | 2.55730200  | -0.07203300 | -2.09223600 |
| C | 3.01942700  | -0.49145900 | -0.02878800 |
| H | 3.39198000  | 0.05287200  | 0.84739800  |
| H | 3.71953600  | -1.31585100 | -0.20263200 |
| C | 2.09829300  | 1.67571400  | -0.89052000 |
| H | 1.77322400  | 2.15241100  | -1.82103700 |
| H | 2.69771200  | 2.41832900  | -0.35148900 |
| C | 0.84706300  | 1.35021000  | -0.01194000 |
| C | 1.62825400  | -1.09593900 | 0.27825300  |
| C | 1.54425200  | -1.48478500 | 1.76517200  |
| H | 0.60886300  | -2.00283800 | 1.98821000  |
| H | 2.37384900  | -2.16161600 | 1.99855200  |
| H | 1.62401900  | -0.61746500 | 2.42345700  |
| C | 1.05404700  | 1.80313000  | 1.44682100  |
| H | 1.07448900  | 2.89775300  | 1.49033600  |
| H | 0.23328400  | 1.45462900  | 2.08136300  |
| H | 1.99618300  | 1.44143000  | 1.86511400  |
| C | 1.41327400  | -2.35769700 | -0.57481100 |
| H | 2.13976100  | -3.12971400 | -0.29889400 |
| H | 0.41194900  | -2.77116900 | -0.41745500 |
| H | 1.52867300  | -2.13373900 | -1.63975400 |
| C | -0.35243000 | 2.11456100  | -0.59170200 |
| H | -1.23283100 | 2.04594400  | 0.04926700  |
| H | -0.08932200 | 3.17376800  | -0.68034900 |
| H | -0.60656300 | 1.73735500  | -1.58655500 |
| O | -0.63340200 | -0.46191800 | 0.51903000  |
| N | 0.59336000  | -0.10783600 | -0.17071400 |
| S | -1.81066200 | -0.98891100 | -0.60144000 |
| C | -3.29289000 | -0.09617900 | -0.12867100 |
| C | -3.29682200 | 0.74489700  | 1.12102100  |
| H | -2.33726400 | 0.73512300  | 1.63661000  |
| H | -3.56782800 | 1.77159000  | 0.85394500  |
| H | -4.07555700 | 0.35501300  | 1.78500300  |
| O | -4.26146900 | -0.28086400 | -0.84159300 |

**Frequencies:**

|                |           |           |           |
|----------------|-----------|-----------|-----------|
| Frequencies -- | 45.0992   | 49.2276   | 62.9918   |
| Frequencies -- | 84.9610   | 93.9487   | 135.6720  |
| Frequencies -- | 152.0386  | 180.2635  | 209.8163  |
| Frequencies -- | 231.8973  | 241.7435  | 276.1420  |
| Frequencies -- | 286.0889  | 292.2970  | 313.7014  |
| Frequencies -- | 315.2028  | 340.6954  | 355.6437  |
| Frequencies -- | 360.7550  | 390.9899  | 402.4082  |
| Frequencies -- | 407.4866  | 425.9713  | 455.5228  |
| Frequencies -- | 481.8048  | 509.9063  | 520.6729  |
| Frequencies -- | 561.3986  | 589.9205  | 623.7840  |
| Frequencies -- | 651.6981  | 760.2875  | 794.5660  |
| Frequencies -- | 800.8615  | 852.0014  | 893.2059  |
| Frequencies -- | 920.3141  | 927.1507  | 942.5259  |
| Frequencies -- | 948.0430  | 987.0976  | 991.1137  |
| Frequencies -- | 1001.6612 | 1013.2354 | 1028.9482 |
| Frequencies -- | 1031.3530 | 1057.2474 | 1075.5578 |
| Frequencies -- | 1091.4408 | 1126.3968 | 1142.4214 |
| Frequencies -- | 1170.5941 | 1220.7496 | 1229.2906 |
| Frequencies -- | 1250.0177 | 1272.1729 | 1276.7093 |
| Frequencies -- | 1291.4715 | 1338.4481 | 1385.0899 |
| Frequencies -- | 1390.6151 | 1402.9254 | 1406.3996 |
| Frequencies -- | 1419.1750 | 1422.5776 | 1437.3354 |
| Frequencies -- | 1440.7993 | 1486.0458 | 1499.6341 |
| Frequencies -- | 1502.9603 | 1508.7933 | 1511.6296 |
| Frequencies -- | 1513.0927 | 1517.8720 | 1520.5459 |
| Frequencies -- | 1527.6839 | 1529.4719 | 1533.8523 |
| Frequencies -- | 1537.3165 | 1539.6397 | 1754.0591 |
| Frequencies -- | 3050.5479 | 3052.5621 | 3055.4573 |
| Frequencies -- | 3057.7223 | 3059.7832 | 3067.6369 |
| Frequencies -- | 3069.7439 | 3071.0644 | 3087.3588 |
| Frequencies -- | 3092.6514 | 3103.1064 | 3122.3236 |
| Frequencies -- | 3122.9049 | 3131.5067 | 3132.9994 |
| Frequencies -- | 3135.6389 | 3135.8963 | 3146.4018 |
| Frequencies -- | 3164.3159 | 3168.3163 | 3191.1432 |

\*\*\*\*\*

**Int-I:****electronic energy:** -1035.200876 Eh**geometry:**

0 1

|   |            |             |             |
|---|------------|-------------|-------------|
| C | 2.79555500 | 0.34682500  | -1.41948000 |
| H | 3.75458800 | 0.60145700  | -1.88362000 |
| H | 2.20600600 | -0.17642500 | -2.18153700 |
| C | 3.00472900 | -0.56299900 | -0.21329900 |
| H | 3.50642800 | 0.00080600  | 0.58338100  |
| H | 3.65548500 | -1.40998500 | -0.45410800 |
| C | 2.07982600 | 1.62864200  | -0.98526500 |
| H | 1.70530000 | 2.15608500  | -1.86844000 |
| H | 2.80511600 | 2.29757600  | -0.50828400 |
| C | 0.90518500 | 1.39808800  | 0.01722900  |
| C | 1.66333100 | -1.12176000 | 0.30217300  |
| C | 1.78260000 | -1.54581900 | 1.77567800  |
| H | 0.83327900 | -1.94774300 | 2.13991800  |

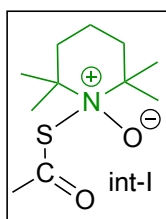

|   |             |             |             |
|---|-------------|-------------|-------------|
| H | 2.54913600  | -2.32179600 | 1.87709300  |
| H | 2.06745500  | -0.69870800 | 2.40655800  |
| C | 1.24583800  | 1.97160700  | 1.40785400  |
| H | 1.36640500  | 3.05896300  | 1.34697300  |
| H | 0.44174100  | 1.75043400  | 2.11734700  |
| H | 2.17840700  | 1.55212700  | 1.79648200  |
| C | 1.23923600  | -2.33489200 | -0.54469100 |
| H | 1.98783300  | -3.12742400 | -0.44667800 |
| H | 0.28066000  | -2.73596100 | -0.20515400 |
| H | 1.14890500  | -2.07172700 | -1.60287900 |
| C | -0.34908700 | 2.09984800  | -0.52052600 |
| H | -1.18463700 | 2.04256300  | 0.17905900  |
| H | -0.10989800 | 3.15642600  | -0.67597700 |
| H | -0.65879000 | 1.67237300  | -1.47803400 |
| O | -0.54429900 | -0.38636800 | 0.65325800  |
| N | 0.63192400  | -0.06151500 | 0.14356800  |
| S | -1.88361100 | -0.97889800 | -0.66578400 |
| C | -3.34393400 | -0.09929300 | -0.12922900 |
| C | -3.32683100 | 0.57979000  | 1.21911000  |
| H | -2.33220400 | 0.60714400  | 1.66383200  |
| H | -3.72288300 | 1.59412500  | 1.10860000  |
| H | -4.00160200 | 0.02686700  | 1.88278900  |
| O | -4.32334000 | -0.12543600 | -0.85414300 |

**Frequencies:**

|                |           |           |           |
|----------------|-----------|-----------|-----------|
| Frequencies -- | 42.1255   | 53.3794   | 90.0131   |
| Frequencies -- | 116.2569  | 123.5762  | 131.4734  |
| Frequencies -- | 163.9442  | 184.9668  | 210.8558  |
| Frequencies -- | 235.9800  | 274.7024  | 275.0972  |
| Frequencies -- | 287.6807  | 297.5337  | 304.2990  |
| Frequencies -- | 330.9609  | 338.2362  | 352.2351  |
| Frequencies -- | 371.4044  | 381.8101  | 392.4388  |
| Frequencies -- | 413.2221  | 429.5378  | 457.0995  |
| Frequencies -- | 466.7216  | 498.6592  | 517.4666  |
| Frequencies -- | 539.6072  | 553.1947  | 605.3170  |
| Frequencies -- | 635.8888  | 705.5727  | 771.5087  |
| Frequencies -- | 810.7292  | 855.7717  | 889.6945  |
| Frequencies -- | 895.3144  | 949.9921  | 964.1917  |
| Frequencies -- | 969.6129  | 972.9759  | 990.3445  |
| Frequencies -- | 997.4695  | 1026.6075 | 1040.0886 |
| Frequencies -- | 1045.5559 | 1062.6893 | 1094.1957 |
| Frequencies -- | 1137.7055 | 1142.9209 | 1146.6195 |
| Frequencies -- | 1188.8972 | 1235.3013 | 1244.2704 |
| Frequencies -- | 1246.8263 | 1262.5165 | 1302.1464 |
| Frequencies -- | 1338.9541 | 1375.7287 | 1379.9507 |
| Frequencies -- | 1383.7695 | 1408.8293 | 1412.6933 |
| Frequencies -- | 1422.4093 | 1433.5815 | 1443.5967 |
| Frequencies -- | 1450.0617 | 1481.6735 | 1495.4497 |
| Frequencies -- | 1503.9325 | 1506.9840 | 1509.8815 |
| Frequencies -- | 1510.9486 | 1517.3815 | 1517.9058 |
| Frequencies -- | 1525.0430 | 1528.3942 | 1531.4793 |
| Frequencies -- | 1540.2169 | 1546.6507 | 1728.6702 |
| Frequencies -- | 3055.0567 | 3065.5816 | 3068.9450 |
| Frequencies -- | 3071.8452 | 3074.3802 | 3075.8492 |
| Frequencies -- | 3078.6022 | 3083.4390 | 3102.7237 |

|                |           |           |           |
|----------------|-----------|-----------|-----------|
| Frequencies -- | 3109.9639 | 3123.2262 | 3126.9717 |
| Frequencies -- | 3140.2691 | 3142.5871 | 3146.1452 |
| Frequencies -- | 3152.6494 | 3157.8563 | 3168.7006 |
| Frequencies -- | 3177.6593 | 3177.9649 | 3200.6971 |

\*\*\*\*\*

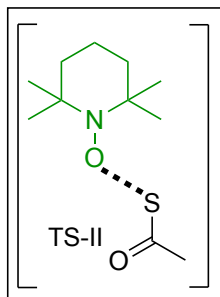

**TS-II:**

**electronic energy:** -1035.202110 Eh

**geometry:**

0 1

|   |             |             |             |
|---|-------------|-------------|-------------|
| C | 2.64579400  | 0.29154800  | -1.55504700 |
| H | 3.56294400  | 0.54313900  | -2.09808000 |
| H | 2.02313300  | -0.28722700 | -2.24695900 |
| C | 2.96438900  | -0.55692500 | -0.32759900 |
| H | 3.52458900  | 0.04182200  | 0.40047800  |
| H | 3.60281600  | -1.40794200 | -0.58592600 |
| C | 1.91764000  | 1.57887300  | -1.14943100 |
| H | 1.38913200  | 1.98436000  | -2.01825700 |
| H | 2.65265600  | 2.33503000  | -0.85208500 |
| C | 0.91179900  | 1.40651500  | 0.03020400  |
| C | 1.67656000  | -1.10853400 | 0.31580200  |
| C | 1.92489200  | -1.52339700 | 1.77580300  |
| H | 1.00235800  | -1.89782900 | 2.22863600  |
| H | 2.67785100  | -2.31799200 | 1.81409900  |
| H | 2.28663000  | -0.67774900 | 2.36800800  |
| C | 1.47841600  | 2.00915600  | 1.33421100  |
| H | 1.61375400  | 3.08972400  | 1.21489800  |
| H | 0.78477700  | 1.83346000  | 2.16279800  |
| H | 2.44805800  | 1.57689000  | 1.59510300  |
| C | 1.17137000  | -2.32598000 | -0.47868300 |
| H | 1.93892900  | -3.10559000 | -0.46088900 |
| H | 0.26256200  | -2.73786300 | -0.03394200 |
| H | 0.96200200  | -2.07190000 | -1.52175400 |
| C | -0.39518100 | 2.12794200  | -0.31657100 |
| H | -1.10743100 | 2.10716100  | 0.51009000  |
| H | -0.15432900 | 3.17335400  | -0.53269500 |
| H | -0.86576300 | 1.69505600  | -1.20238400 |
| O | -0.53409400 | -0.38111500 | 0.72486000  |
| N | 0.64065000  | -0.04056200 | 0.27465200  |
| S | -1.86748200 | -0.98455800 | -0.65070300 |
| C | -3.33625700 | -0.10903500 | -0.13787100 |
| C | -3.35434400 | 0.53149700  | 1.23103300  |
| H | -2.37844500 | 0.51920000  | 1.71586800  |
| H | -3.71607400 | 1.56018700  | 1.13475800  |
| H | -4.07186600 | -0.01822100 | 1.85103300  |
| O | -4.30010600 | -0.09765600 | -0.88551200 |

**Frequencies:**

|                |           |         |         |
|----------------|-----------|---------|---------|
| Frequencies -- | -220.1416 | 28.3000 | 36.7365 |
| Frequencies -- | 42.5391   | 58.6421 | 77.7138 |

|                |           |           |           |
|----------------|-----------|-----------|-----------|
| Frequencies -- | 116.0652  | 138.7477  | 147.2148  |
| Frequencies -- | 224.7202  | 243.3615  | 262.5306  |
| Frequencies -- | 282.6589  | 291.6156  | 310.5078  |
| Frequencies -- | 322.7378  | 326.1515  | 331.6611  |
| Frequencies -- | 356.3506  | 371.3090  | 396.7514  |
| Frequencies -- | 407.5920  | 417.2528  | 431.6702  |
| Frequencies -- | 448.6633  | 482.1354  | 525.5701  |
| Frequencies -- | 532.9155  | 580.8777  | 593.0582  |
| Frequencies -- | 627.4336  | 663.0854  | 802.6274  |
| Frequencies -- | 812.9552  | 860.4620  | 899.6197  |
| Frequencies -- | 929.8393  | 941.6825  | 947.0401  |
| Frequencies -- | 983.6259  | 991.2543  | 999.8520  |
| Frequencies -- | 1012.8442 | 1031.1761 | 1035.4317 |
| Frequencies -- | 1052.6816 | 1090.8177 | 1095.2411 |
| Frequencies -- | 1117.1003 | 1130.8965 | 1167.2229 |
| Frequencies -- | 1172.7200 | 1214.0132 | 1228.6615 |
| Frequencies -- | 1252.8945 | 1270.0492 | 1285.7340 |
| Frequencies -- | 1298.3783 | 1341.6908 | 1386.2036 |
| Frequencies -- | 1394.7023 | 1403.6871 | 1408.1641 |
| Frequencies -- | 1417.8236 | 1421.1802 | 1437.2220 |
| Frequencies -- | 1441.4357 | 1485.9140 | 1501.2279 |
| Frequencies -- | 1502.2367 | 1508.0138 | 1510.7615 |
| Frequencies -- | 1512.9219 | 1516.7946 | 1519.3097 |
| Frequencies -- | 1525.2248 | 1528.6812 | 1531.8205 |
| Frequencies -- | 1535.6643 | 1536.9684 | 1736.5308 |
| Frequencies -- | 3047.7985 | 3052.5046 | 3055.3229 |
| Frequencies -- | 3058.5362 | 3060.0871 | 3066.1057 |
| Frequencies -- | 3066.1212 | 3072.9480 | 3090.7326 |
| Frequencies -- | 3097.2907 | 3103.4116 | 3122.6935 |
| Frequencies -- | 3128.8982 | 3131.9704 | 3133.9502 |
| Frequencies -- | 3135.3277 | 3139.3403 | 3142.4384 |
| Frequencies -- | 3145.4380 | 3166.7523 | 3184.2304 |

\*\*\*\*\*

## References:

- (1) Elagawany, M.; Hegazy, L.; Elgendy, B. Catalyst- and organic solvent-free synthesis of thioacids in water. *Tetrahedron Letters* **2019**, *60* (30), 2018-2021.
- (2) Khaybullin, R.; Panda, S. S.; Al-Youbi, A. O.; Katritzky, A. R. A Facile Synthesis of Thioacids from N-Acylbenzotriazoles. *Synlett* **2014**, *25* (02), 247-250.
- (3) Madhu, C.; Vishwanatha, T.; Sureshbabu, V. V. An efficient synthesis of N $\alpha$ -protected amino and peptide acid aryl amides via iodine-mediated oxidative acylation of N $\alpha$ -protected amino and peptide thioacids. *Synthesis* **2013**, *45* (19), 2727-2736.
- (4) Madhu, C.; Basavaprabhu; Vishwanatha, T. M.; Sureshbabu, V. V. T3P (propylphosphonic anhydride) mediated conversion of N $\alpha$ -protected amino/peptide acids into thioacids. *Tetrahedron Lett.* **2012**, *53* (11), 1406-1409.
- (5) Smedley, C. J.; Li, G.; Barrow, A. S.; Gialelis, T. L.; Giel, M. C.; Ottonello, A.; Cheng, Y.; Kitamura, S.; Wolan, D. W.; Sharpless, K. B. Diversity oriented clicking (DOC): divergent synthesis of SuFExable pharmacophores from 2-substituted-alkynyl-1-sulfonyl fluoride (SASF) hubs. *Angewandte Chemie* **2020**, *132* (30), 12560-12569.
- (6) Murai, T.; Asai, F. Three-Component Coupling Reactions of Thioformamides with Organolithium and Grignard Reagents Leading to Formation of Tertiary Amines and a Thioliating Agent. *J. Am. Chem. Soc.* **2007**, *129* (4), 780-781.
- (7) Zhao, B.; Liu, Y.-X.; Liang, P.-P.; Hu, G.-Q.; Liu, J.-H. S-Arylation of Thioic S-Acid Using Thianthrenium Salts via Photoactivation of Electron Donor–Acceptor Complex. *J. Org. Chem.* **2024**, *89* (17), 12508-12513.
- (8) Elagawany, M.; Hegazy, L.; Elgendy, B. Catalyst- and organic solvent-free synthesis of thioacids in water. *Tet. Lett.* **2019**, *60* (30), 2018-2021.
- (9) Fu, Z.; Rong, B.; Huang, L. Pd-Catalyzed Coupling of Aryl Chloride, Isocyanides, and Thiocarboxylate To Synthesize Thioamides. *Org. Lett.* **2025**, *27* (11), 2782-2787.
- (10) Chen, H.; Xu, X.; Liu, L. L.; Tang, G.; Zhao, Y. Phosphorus oxychloride as an efficient coupling reagent for the synthesis of esters, amides and peptides under mild conditions. *RSC Adv.* **2013**, *3* (37), 16247-16250.
- (11) Kokare, N.; Nagawade, R.; Rane, V.; Shinde, D. B. Design, synthesis and utilization of 1-substituted sulphonyloxy-2-phenyl benzimidazole as a novel peptide coupling reagents. *Protein Pept. Lett.* **2007**, *14* (3), 259-263.
- (12) Hill, R. R.; Birch, D.; Jeffs, G. E.; North, M. Enantioselection in peptide bond formation. *Org. Biomol. Chem.* **2003**, *1* (6), 965-972.
- (13) Baxendale, I. R.; Ley, S. V.; Smith, C. D.; Tranmer, G. K. A flow reactor process for the synthesis of peptides utilizing immobilized reagents, scavengers and catch and release protocols. *Chem. Comm.* **2006**, (46), 4835-4837, 10.1039/B612197G.
- (14) Hoogwater, D. A.; Peereboom, M. Kinetics of the alkaline hydrolysis of several n-benzyloxycarbonyldipeptide methyl and ethyl esters. *Tetrahedron* **1990**, *46* (15), 5325-5332.
- (15) Kon, K.; Kohari, Y.; Murata, M. Unnatural tripeptide as highly enantioselective organocatalyst for asymmetric aldol reaction of isatins. *Tet. Lett.* **2019**, *60* (5), 415-418.
- (16) Fraczyk, J.; Kaminski, Z. J.; Katarzynska, J.; Kolesinska, B. 4-(4, 6-Dimethoxy-1, 3, 5-triazin-2-yl)-4-methylmorpholinium Toluene-4-sulfonate (DMT/NMM/TsO<sup>-</sup>) Universal Coupling Reagent for Synthesis in Solution. *Helv. Chim. Acta* **2018**, *101* (1), e1700187.
- (17) Chen, H.; He, M.; Wang, Y.; Zhai, L.; Cui, Y.; Li, Y.; Li, Y.; Zhou, H.; Hong, X.; Deng, Z. Metal-free direct amidation of peptidyl thiol esters with  $\alpha$ -amino acid esters. *Green Chem.* **2011**, *13* (10), 2723-2726.
- (18) Nuijens, T.; Cusan, C.; van Dooren, T. J.; Moody, H. M.; Merckx, R.; Kruijtzter, J. A.; Rijkers, D. T.; Liskamp, R. M.; Quaedflieg, P. J. Fully enzymatic peptide synthesis using C-terminal tert-butyl ester interconversion. *Adv. Synth. Catal.* **2010**, *352* (14-15), 2399-2404.

- (19) Vescovi, A.; Knoll, A.; Koert, U. Synthesis and functional studies of THF–gramicidin hybrid ion channels. *Org. Biomol. Chem.* **2003**, *1* (16), 2983-2997.
- (20) Camacho, L. A., III; Lampkin, B. J.; VanVeller, B. A Bottom-Up Approach To Preserve Thioamide Residue Stereochemistry during Fmoc Solid-Phase Peptide Synthesis. *Org. Lett.* **2019**, *21* (17), 7015-7018.
- (21) Markowicz, M. W.; Dembinski, R. Fluorous coupling reagents: application of 2-chloro-4, 6-bis [(heptadecafluorononyl) oxy]-1, 3, 5-triazine in peptide synthesis. *Synthesis* **2004**, *2004* (01), 80-86.
- (22) OKADA, Y.; OKINAKA, M.; YAGYU, M.; WATABE, K.; SANo, K.; KAKIUCHI, Y. Amino acids and peptides. II. Synthesis of stereoisomeric alanine containing peptide derivatives and their effects on germination of *Bacillus thiaminolyticus* spores. *Chem. Pharm. Bull.* **1976**, *24* (12), 3081-3084.
- (23) Xie, M.-S.; Huang, B.; Li, N.; Tian, Y.; Wu, X.-X.; Deng, Y.; Qu, G.-R.; Guo, H.-M. Rational Design of 2-Substituted DMAP-N-oxides as Acyl Transfer Catalysts: Dynamic Kinetic Resolution of Azlactones. *J. Am. Chem. Soc.* **2020**, *142* (45), 19226-19238.
- (24) Jaganathan, A.; Staples, R. J.; Borhan, B. Kinetic Resolution of Unsaturated Amides in a Chlorocyclization Reaction: Concomitant Enantiomer Differentiation and Face Selective Alkene Chlorination by a Single Catalyst. *J. Am. Chem. Soc.* **2013**, *135* (39), 14806-14813.
- (25) Tian, X.; Kaur, J.; Yakubov, S.; Barham, J. P.  $\alpha$ -Amino Radical Halogen Atom Transfer Agents for Metallaphotoredox-Catalyzed Cross-Electrophile Couplings of Distinct Organic Halides. *ChemSusChem* **2022**, *15* (15), e202200906.
- (26) Tallon, S.; Manoni, F.; Connon, S. J. A Practical Aryl Unit for Azlactone Dynamic Kinetic Resolution: Orthogonally Protected Products and A Ligation-Inspired Coupling Process. *Angew. Chem.* **2015**, *127* (3), 827-831.
- (27) Mahesh, M.; Veladi, P.; Girish, P.; Roopesh, K. L.; Venkata, R. P.; and Sureshbabu, V. V. Oxidative amidation of benzyl alcohols with amino acid esters mediated by N-hydroxysuccinimide/phenyliodine diacetate. *Synth. Commun.* **2017**, *47* (7), 716-721.
- (28) Saito, Y.; Ouchi, H.; Takahata, H. Carboxamidation of carboxylic acids with 1-tert-butoxy-2-tert-butoxycarbonyl-1,2-dihydroisoquinoline (BBDI) without bases. *Tetrahedron* **2008**, *64* (49), 11129-11135.
- (29) Zhao, X.; Yang, J.-D.; Cheng, J.-P. Revisiting the Electrochemistry of TEMPOH Analogues in Acetonitrile. *J. Org. Chem.* **2023**, *88* (1), 540-547.
- (30) Golubev, V.; Rozantsev, E.; Neiman, M. Some reactions of free iminoxyl radicals with the participation of the unpaired electron. *Bull. Acad. Sci. USSR, Div. Chem. Sci.* **1965**, *14* (11), 1898-1904.
- (31) Maeda, H.; Wu, H.-Y.; Yamauchi, Y.; Ohmori, H. Important Role of the 3-Mercaptopropionamide Moiety in Glutathione: Promoting Effect on Decomposition of the Adduct of Glutathione with the Oxoammonium Ion of TEMPO. *J. Org. Chem.* **2005**, *70* (21), 8338-8343.
- (32) Weierbach, S. M.; Reynolds, R. P.; Stephens, S. M.; Vlasakakis, K. V.; Ritter, R. T.; White, O. M.; Patel, N. H.; Hayes, E. C.; Dunmire, S.; Lambert, K. M. Chemoselective Oxidation of Thiols with Oxoammonium Cations. *J. Org. Chem.* **2023**, *88* (16), 11392-11410.
- (33) M. J. Frisch, G. W. T., H. B. Schlegel, G. E. Scuseria, M. A. Robb, J. R. Cheeseman, G. Scalmani, V. Barone, G. A. Petersson, H. Nakatsuji, X. Li, M. Caricato, A. V. Marenich, J. Bloino, B. G. Janesko, R. Gomperts, B. Mennucci, H. P. Hratchian, J. V. Ortiz, A. F. Izmaylov, J. L. Sonnenberg, D. Williams-Young, F. Ding, F. Lipparini, F. Egidi, J. Goings, B. Peng, A. Petrone, T. Henderson, D. Ranasinghe, V. G. Zakrzewski, J. Gao, N. Rega, G. Zheng, W. Liang, M. Hada, M. Ehara, K. Toyota, R. Fukuda, J. Hasegawa, M. Ishida, T. Nakajima, Y. Honda, O. Kitao, H. Nakai, T. Vreven, K. Throssell, J. A. Montgomery, Jr., J. E. Peralta, F. Ogliaro, M. J. Bearpark, J. J. Heyd, E. N. Brothers, K. N. Kudin, V. N. Staroverov, T. A. Keith, R. Kobayashi, J. Normand, K. Raghavachari, A. P. Rendell, J. C. Burant, S. S. Iyengar, J. Tomasi, M. Cossi, J. M. Millam, M. Klene, C. Adamo, R. Cammi, J. W. Ochterski, R. L. Martin, K. Morokuma, O. Farkas, J. B. Foresman, and D. J. Fox. Gaussian 16, Revision C.01, Gaussian, Inc., Wallingford CT. **2016**.
- (34) Becke, A. D. Density-functional thermochemistry. III. The role of exact exchange. *J. Chem. Phys.* **1993**, *98* (7), 5648-5652.

- (35) Scrocco, S.; Tomasi, J. Electrostatic Interaction of a Solute with a Continuum. A Direct Utilization of Ab Initio Molecular Potentials for the Prevision of Solvent Effects. *Chem. Phys.* **1981**, 55.
- (36) Grimme, S.; Antony, J.; Ehrlich, S.; Krieg, H. A consistent and accurate ab initio parametrization of density functional dispersion correction (DFT-D) for the 94 elements H-Pu. *J. Chem. Phys.* **2010**, 132 (15).

# Copies of NMR spectra

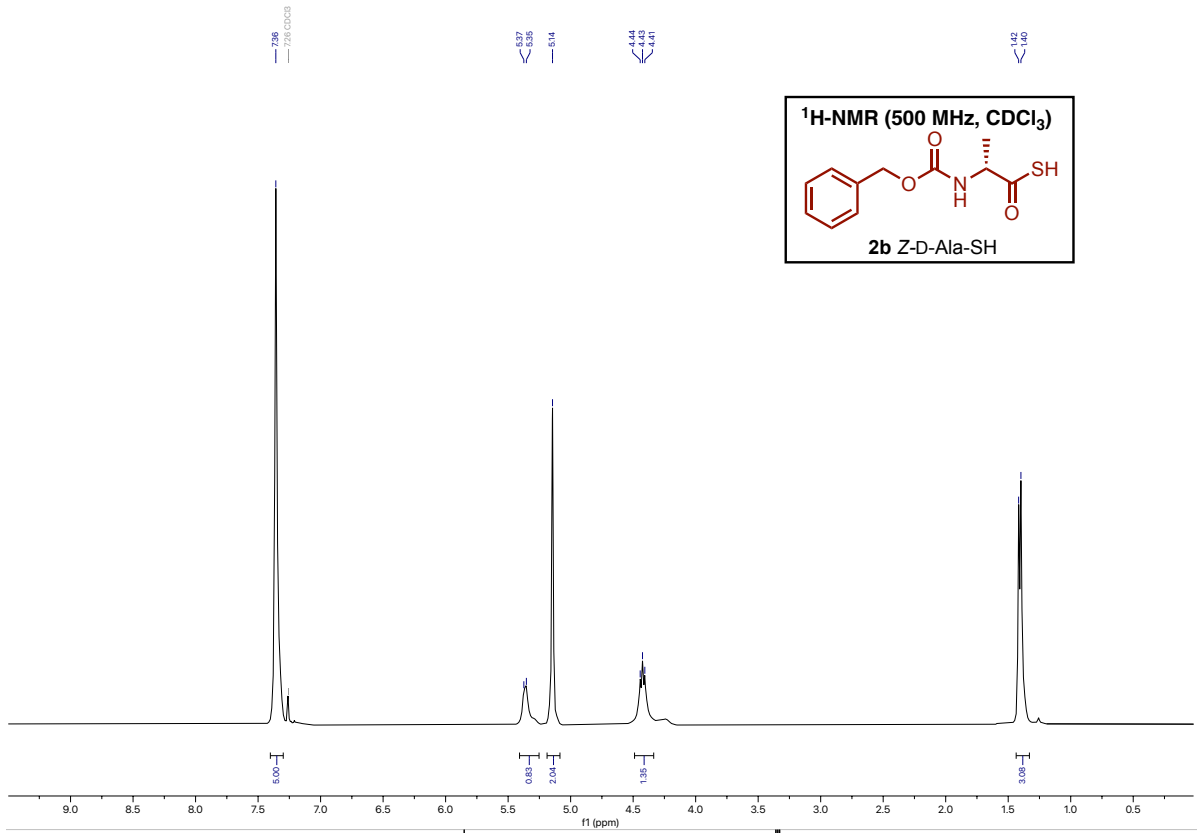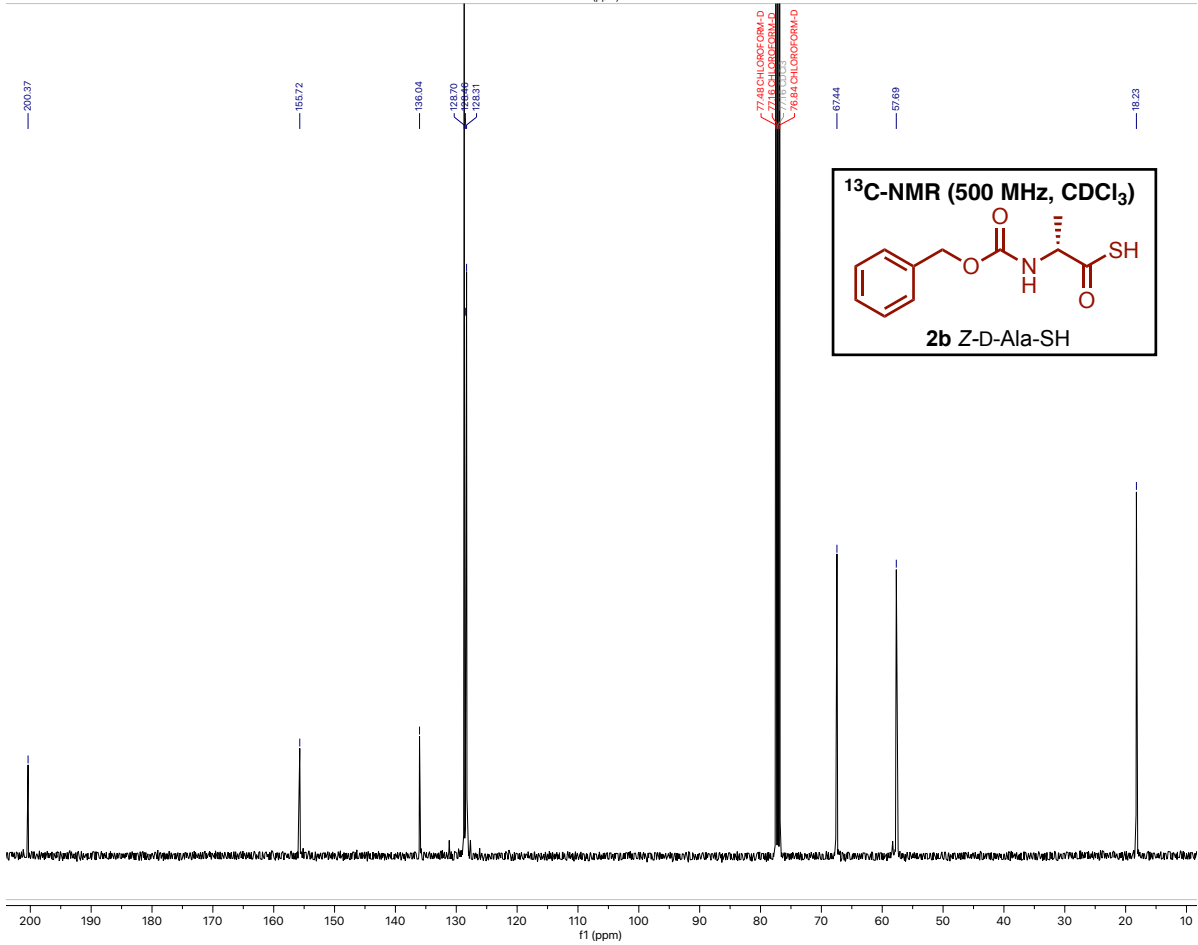

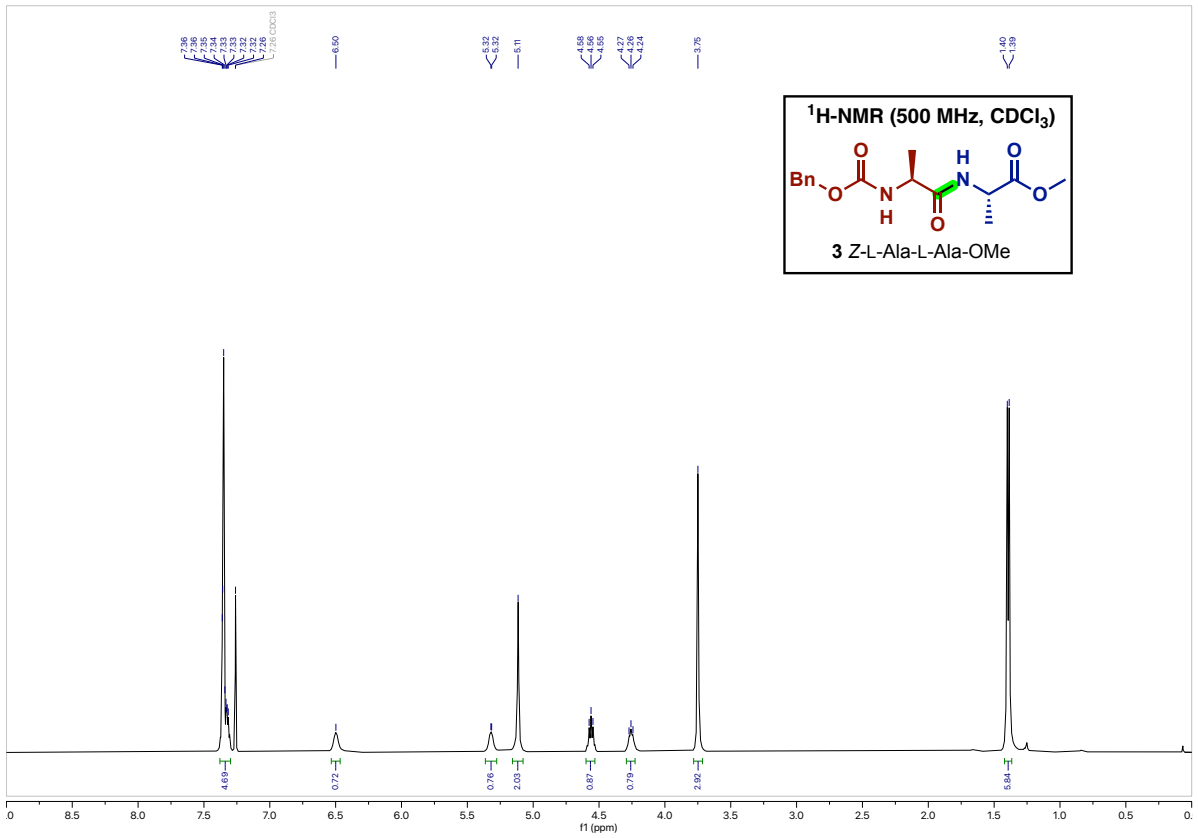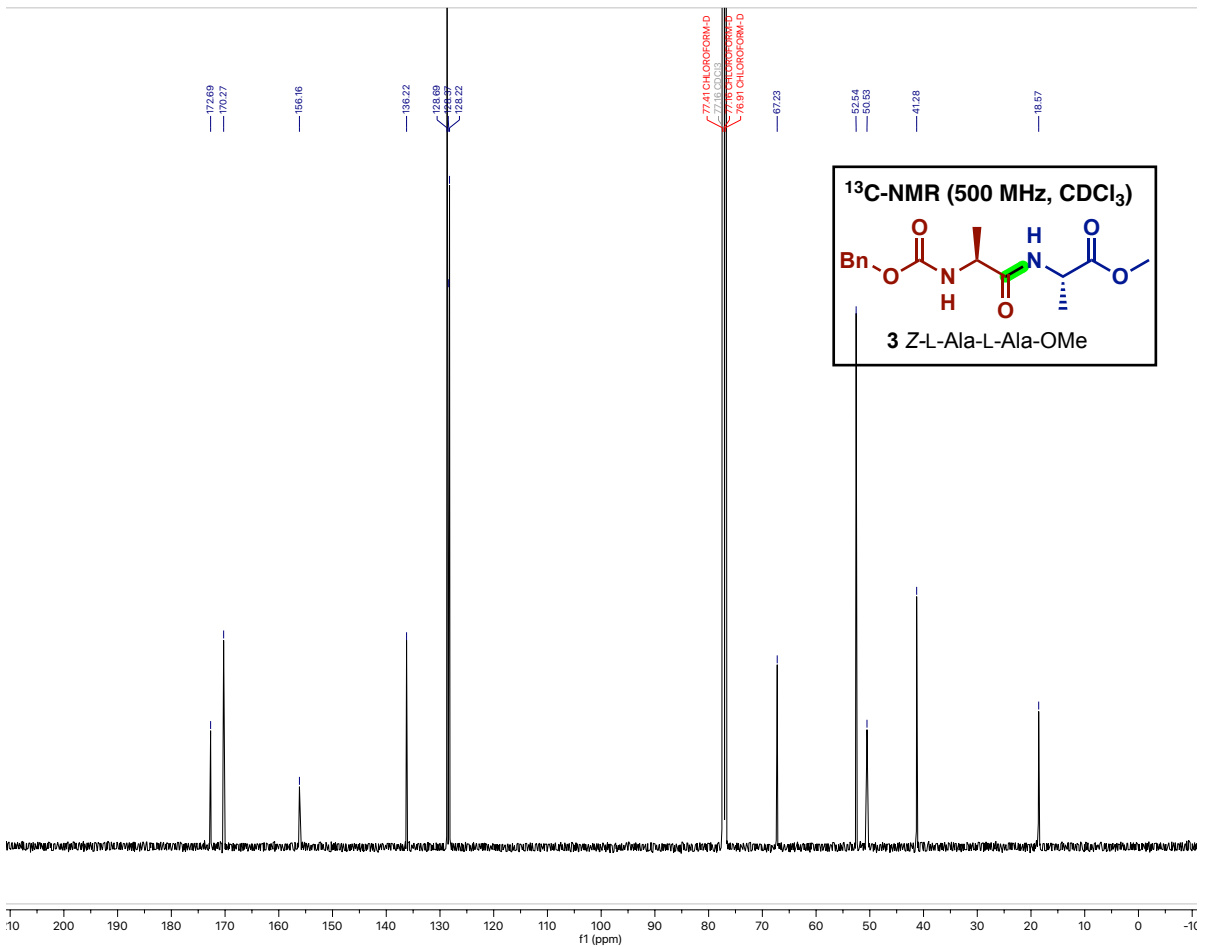

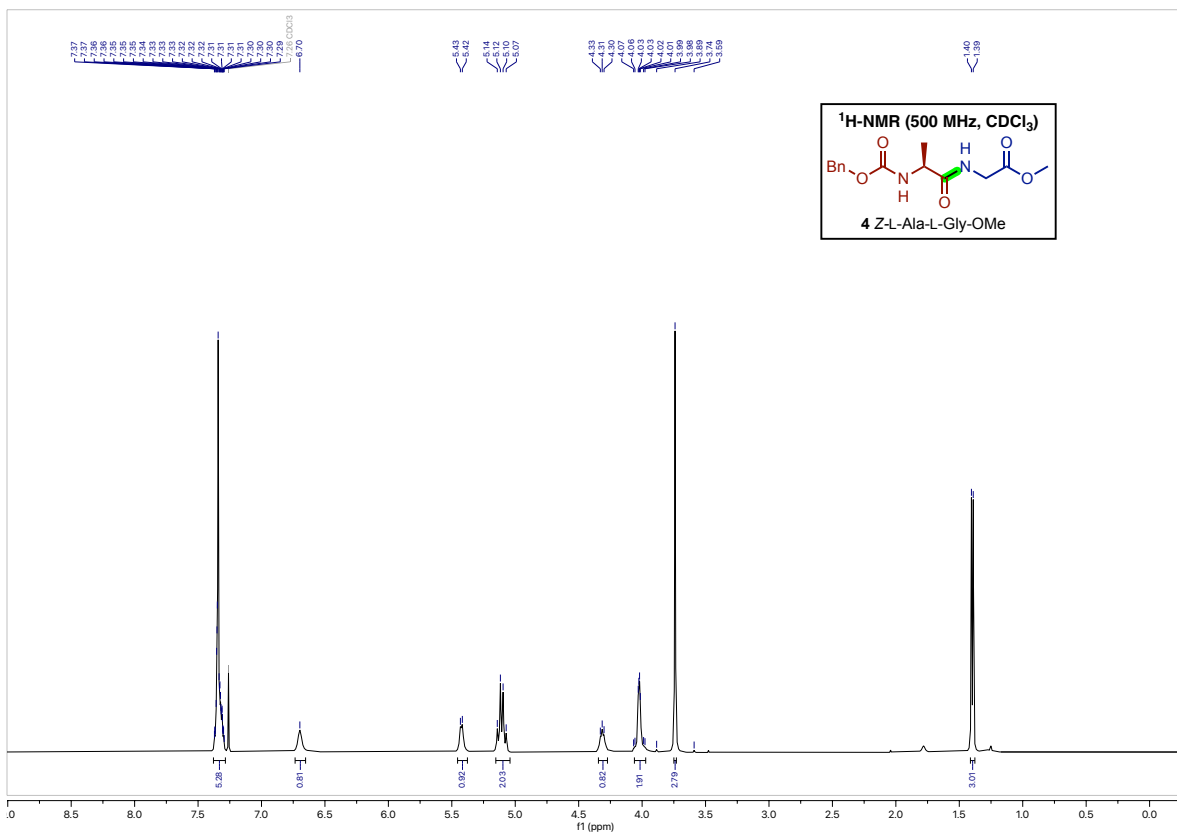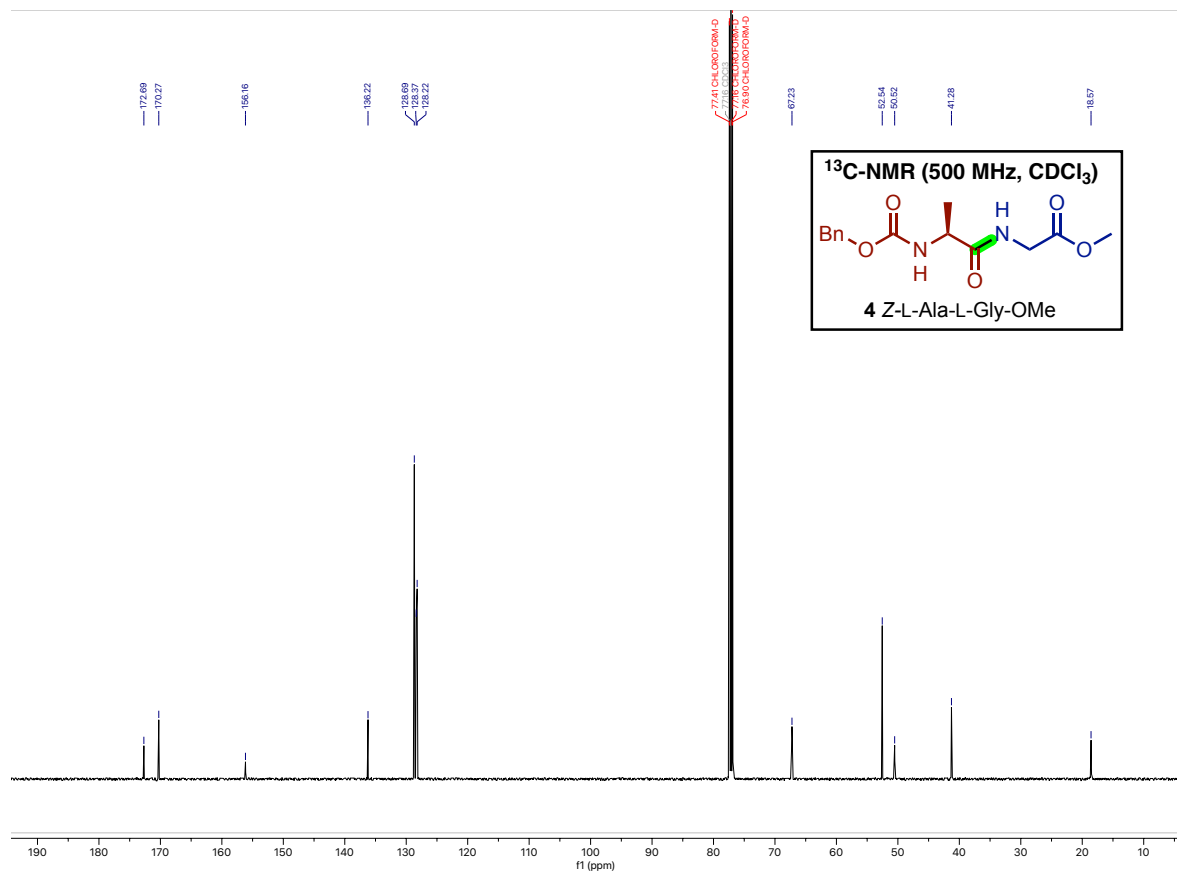

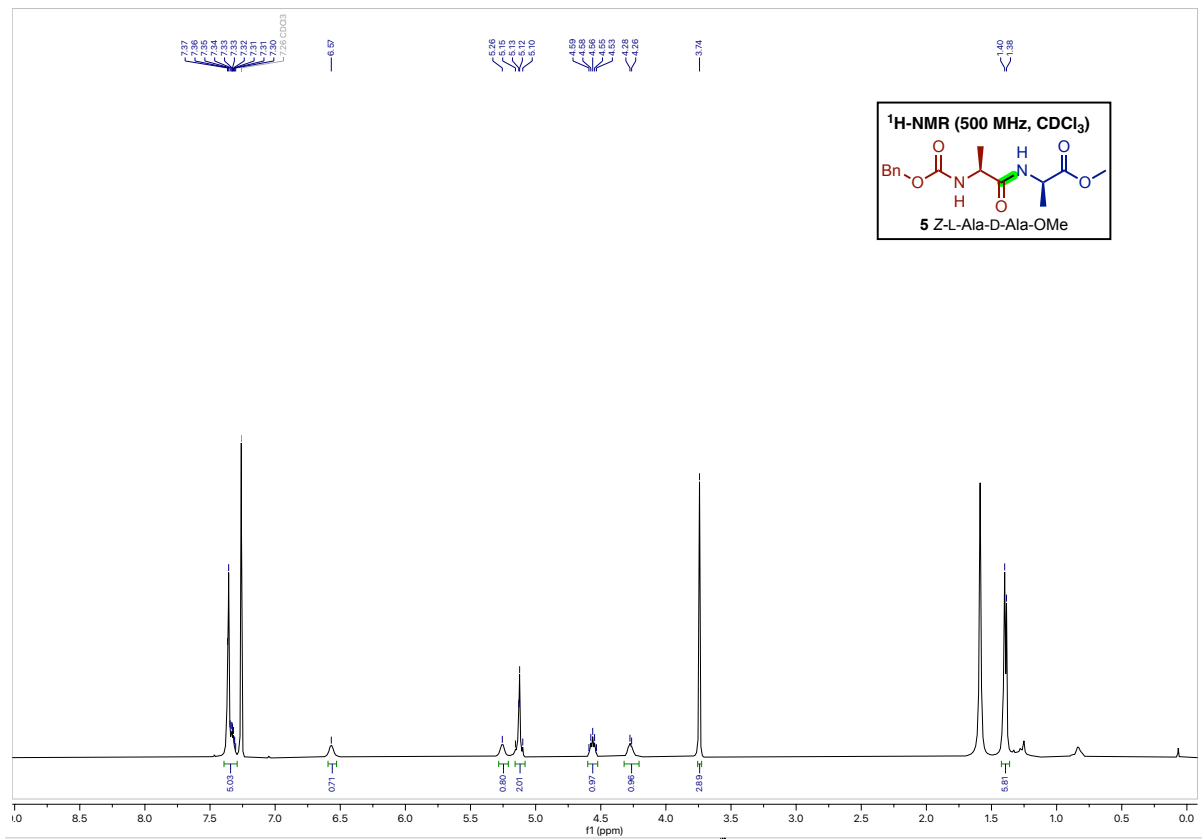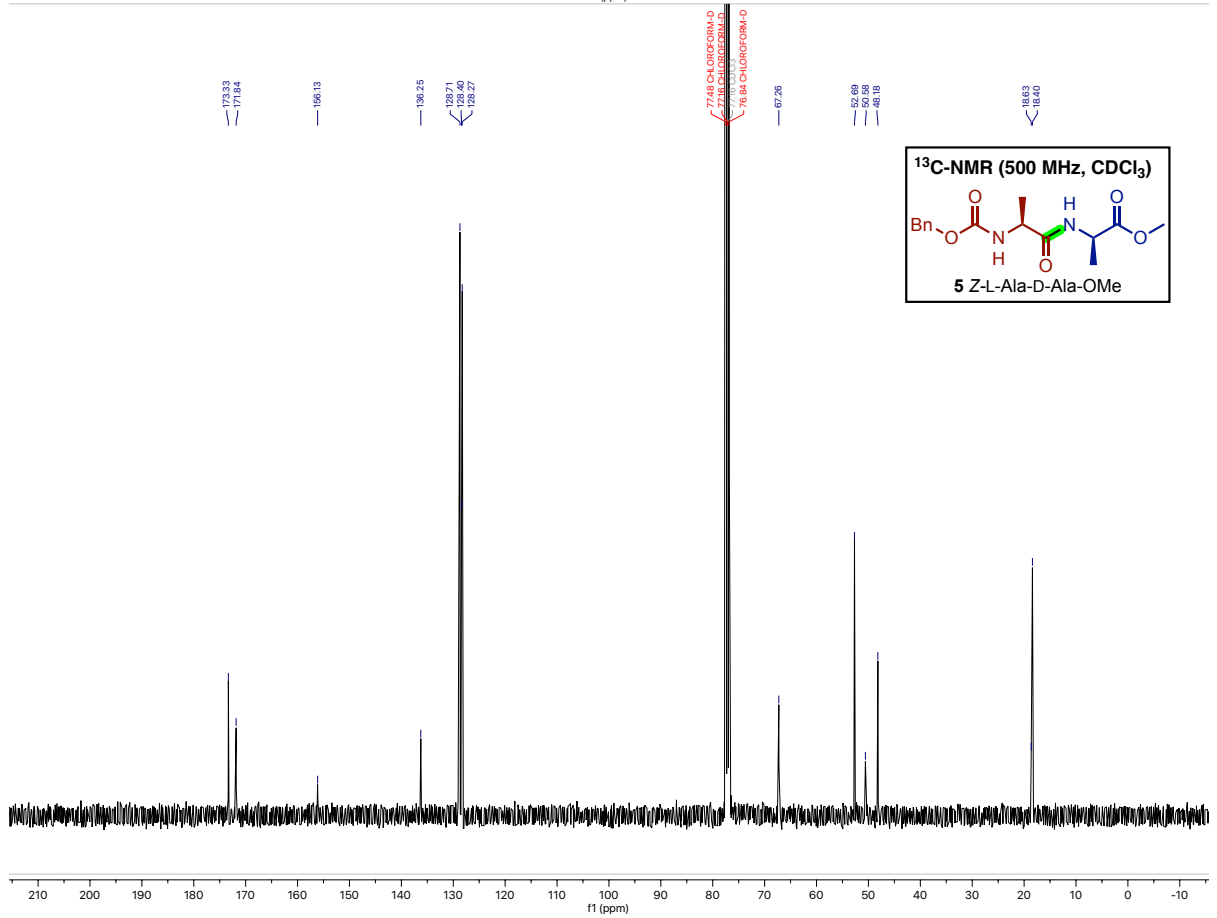

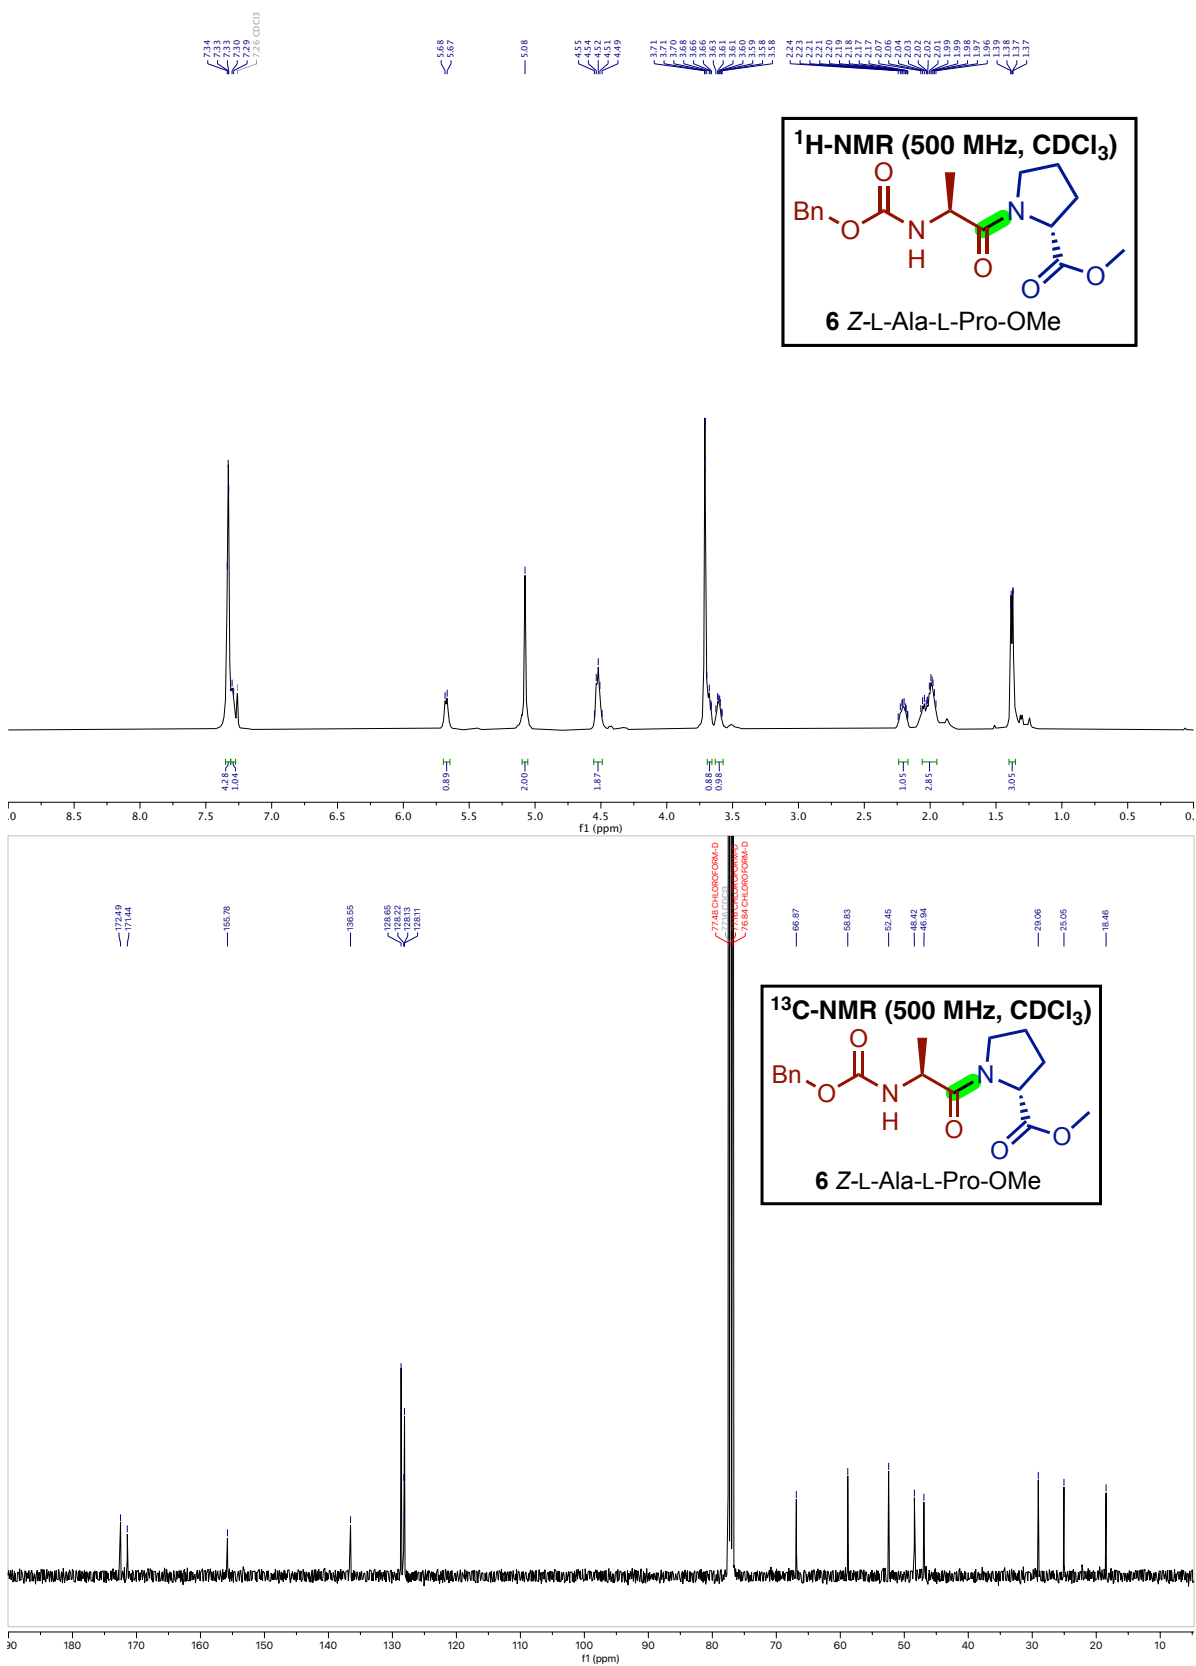

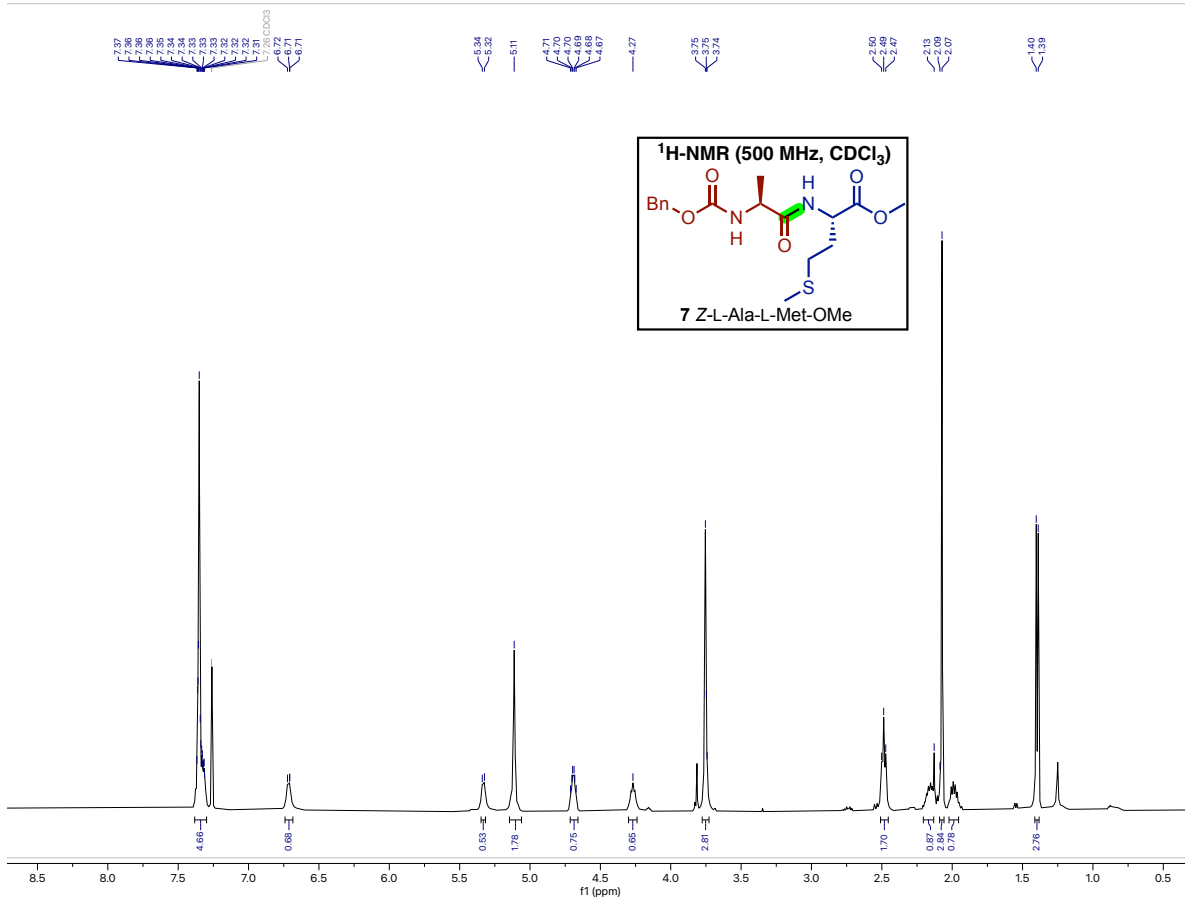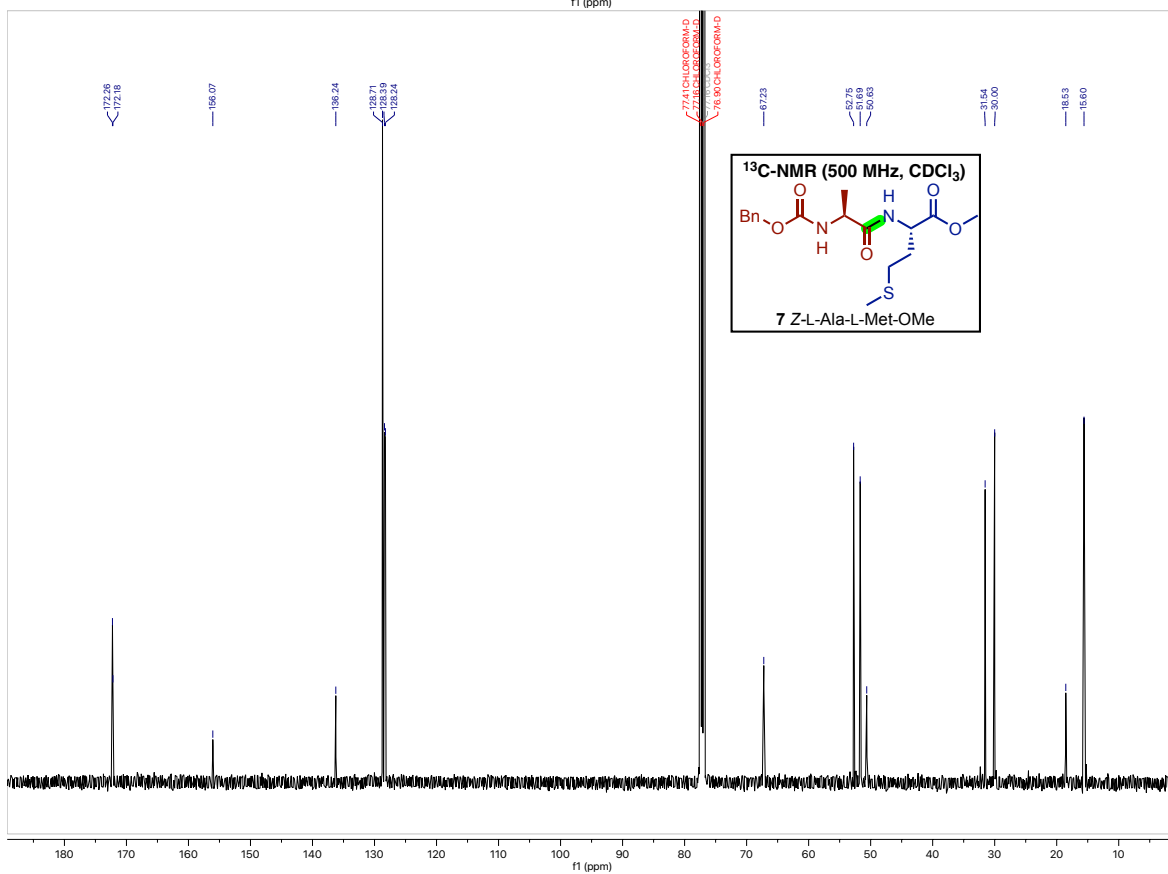

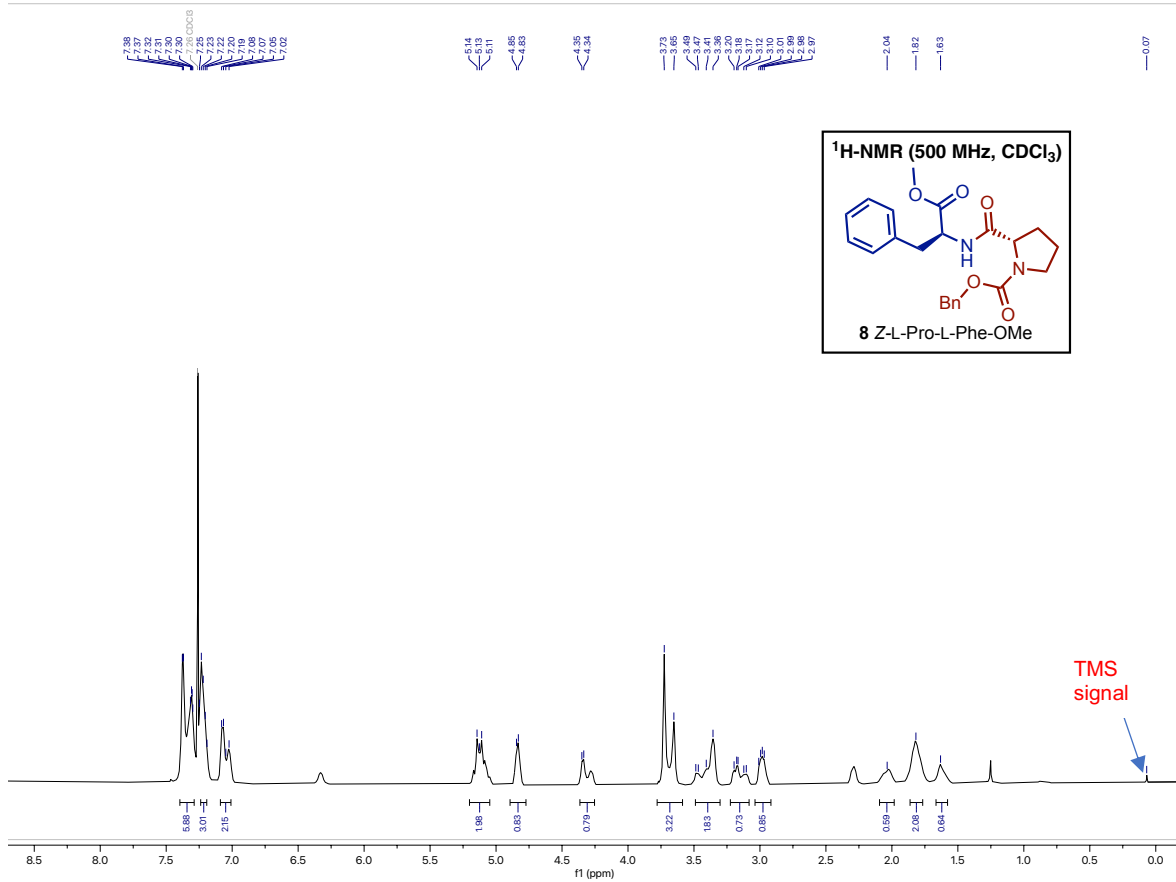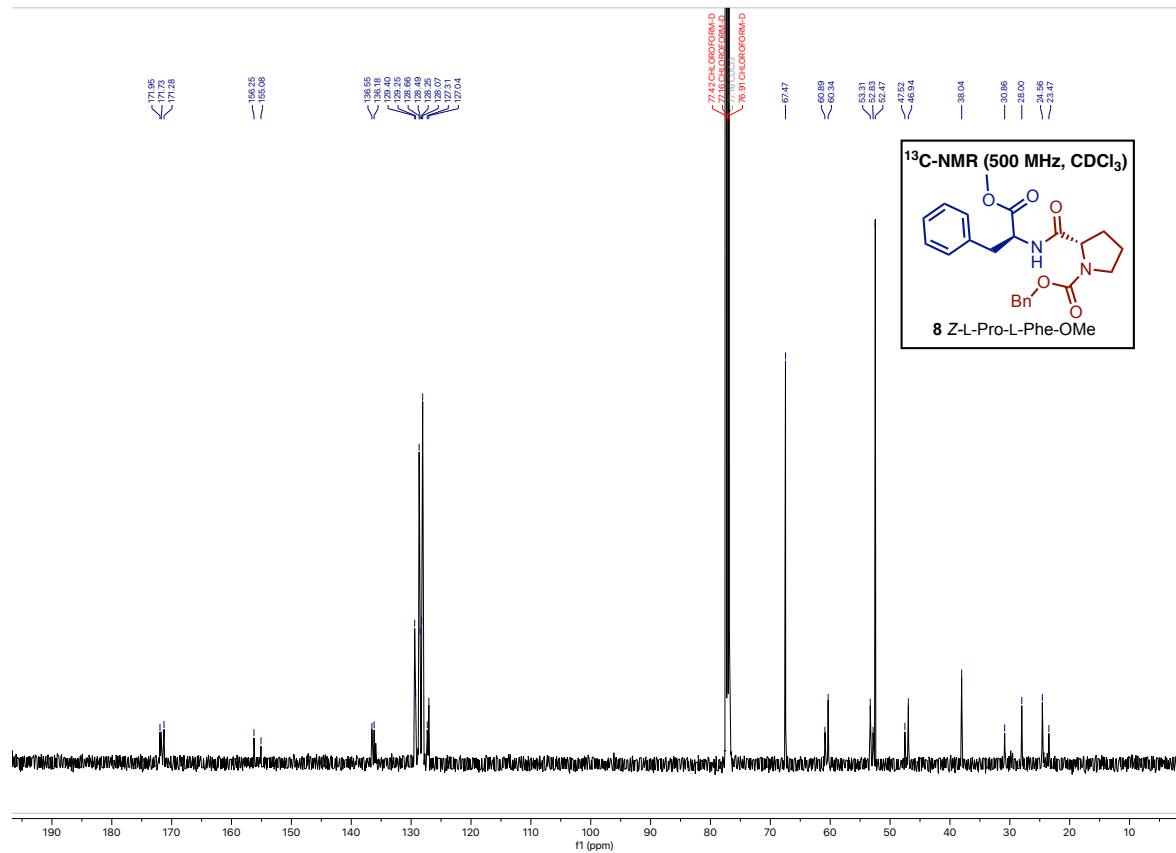

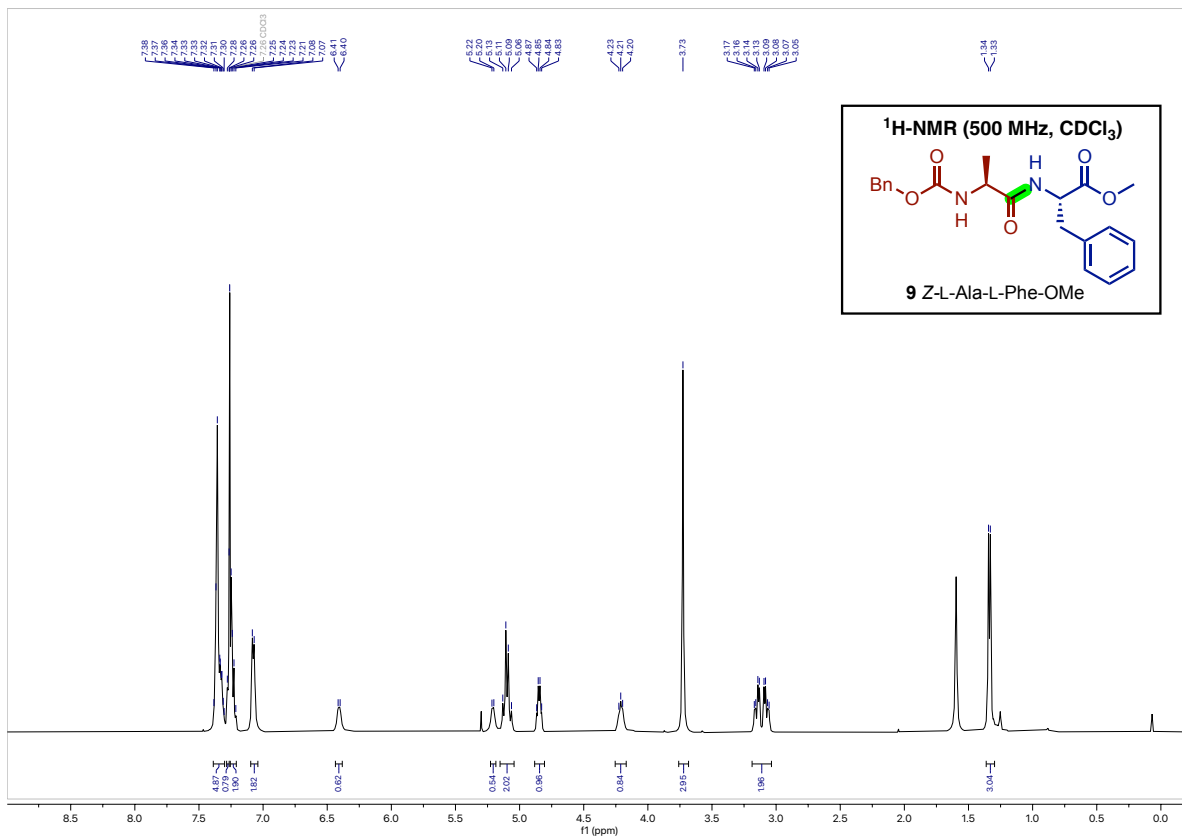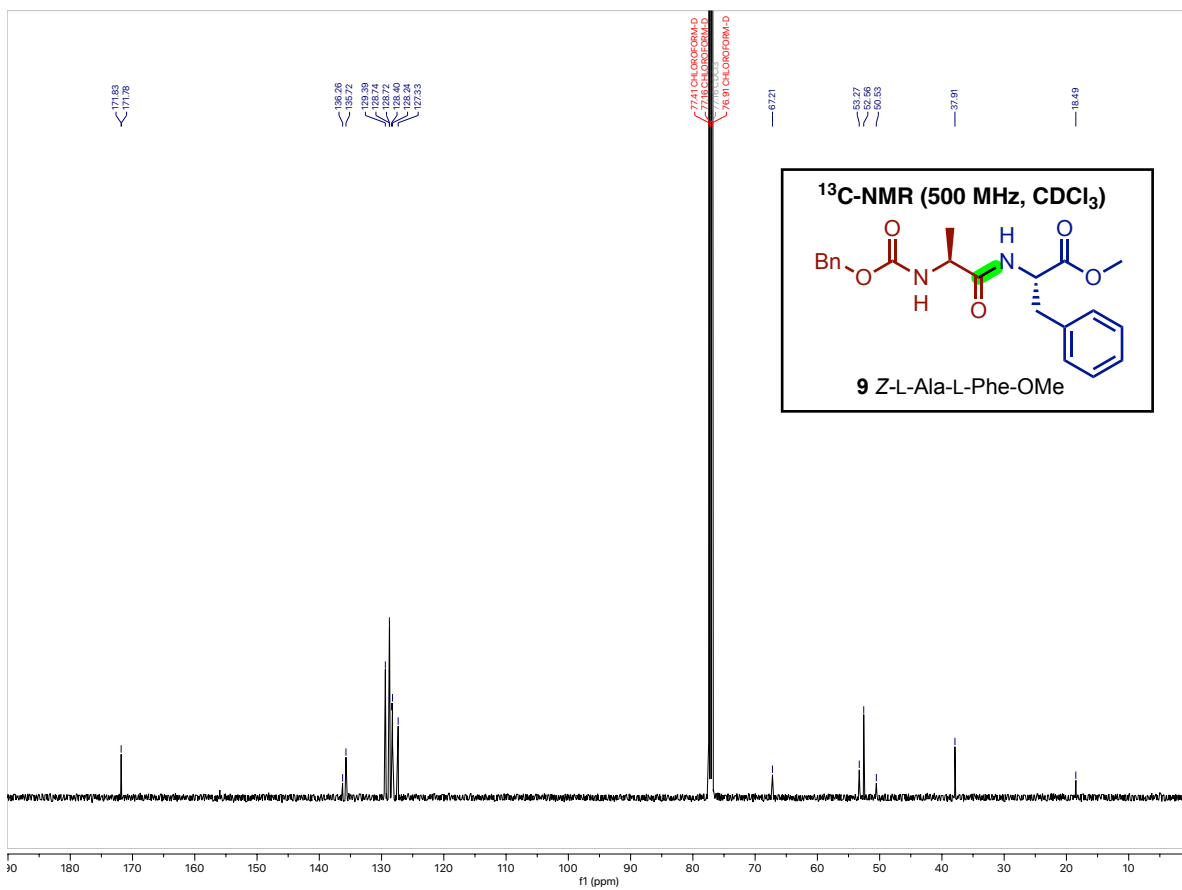

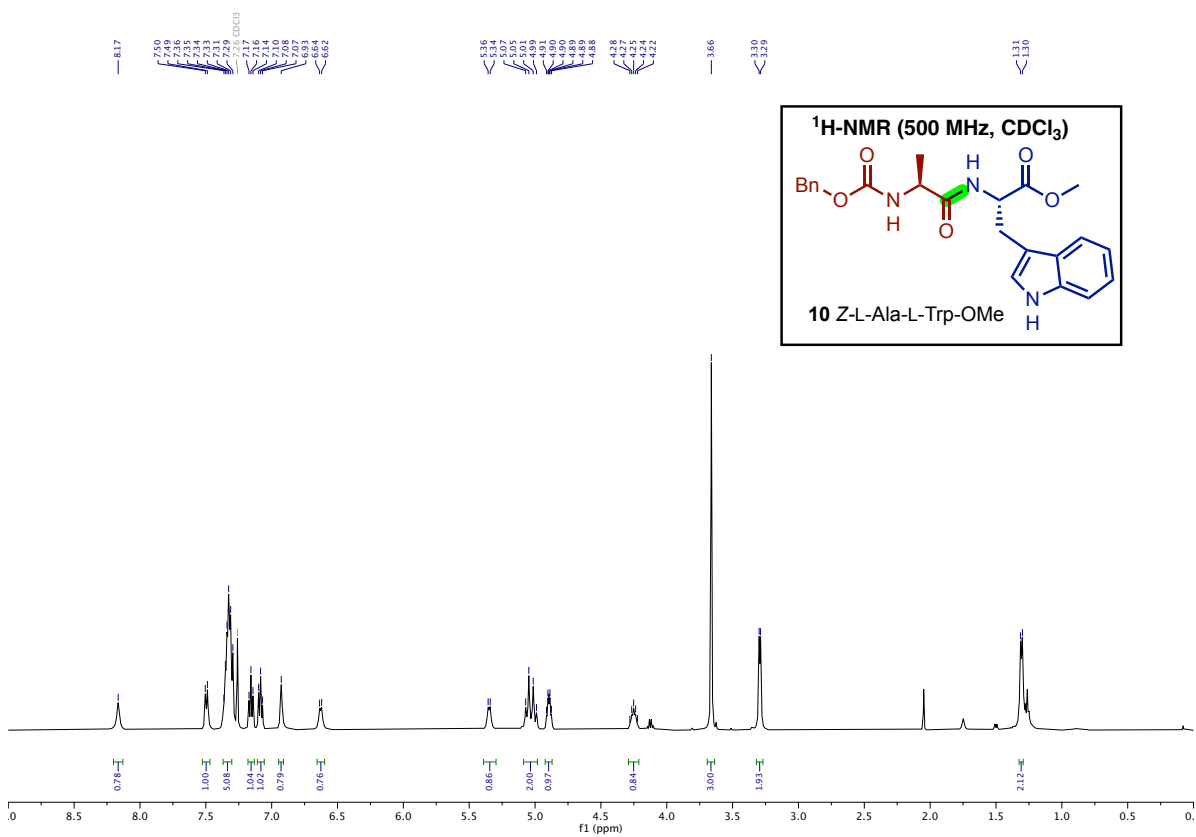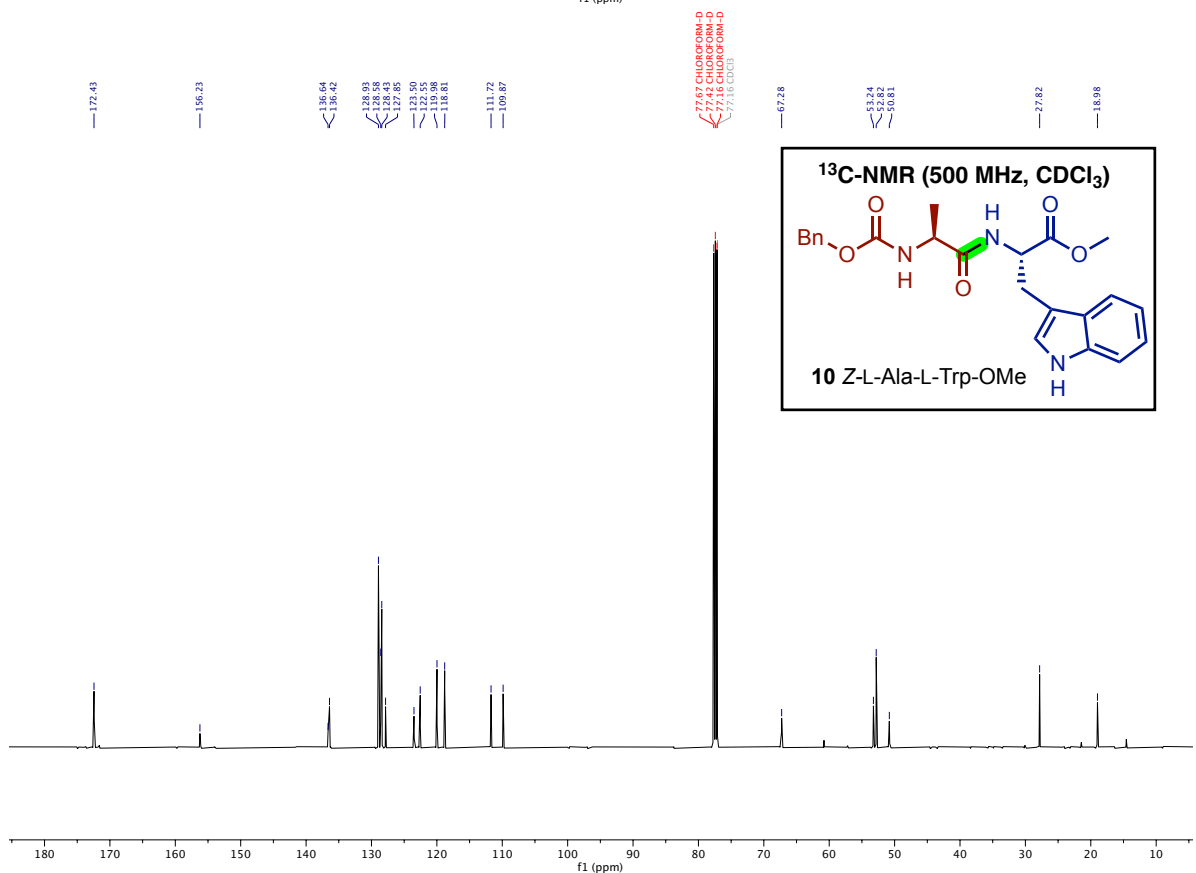

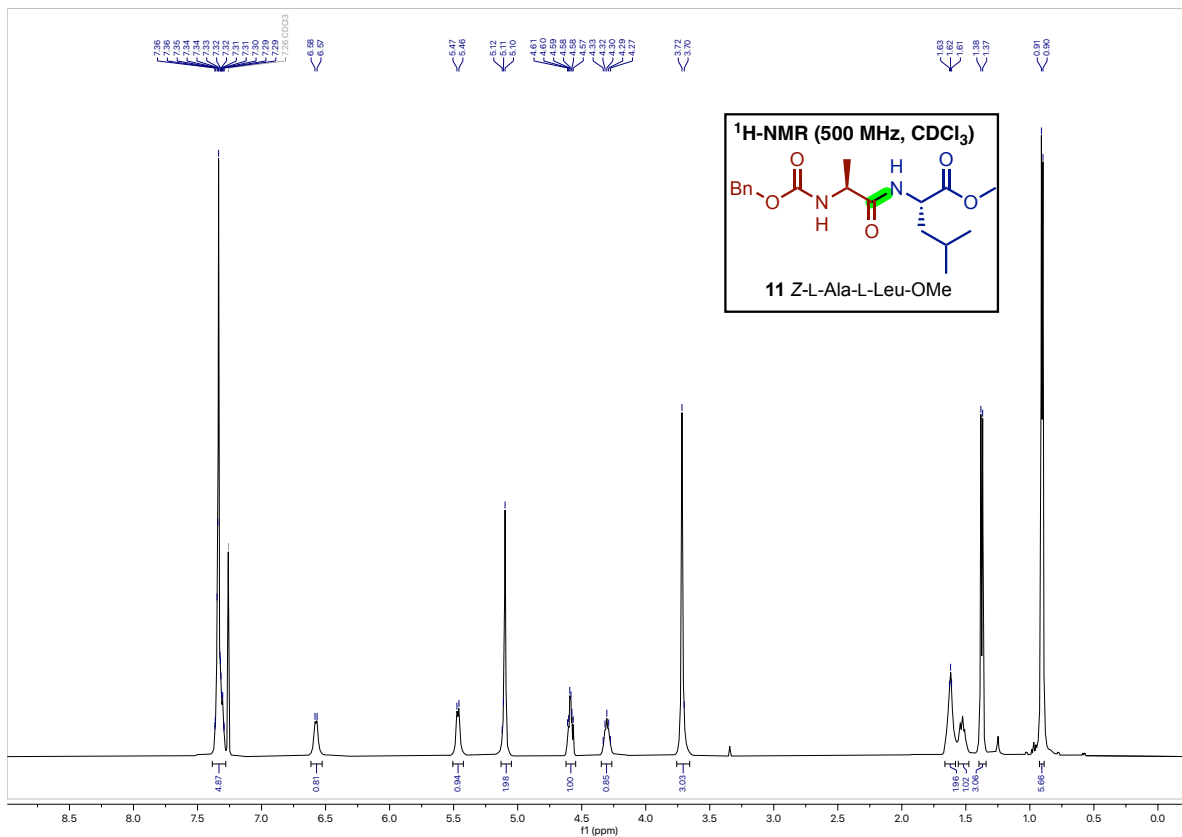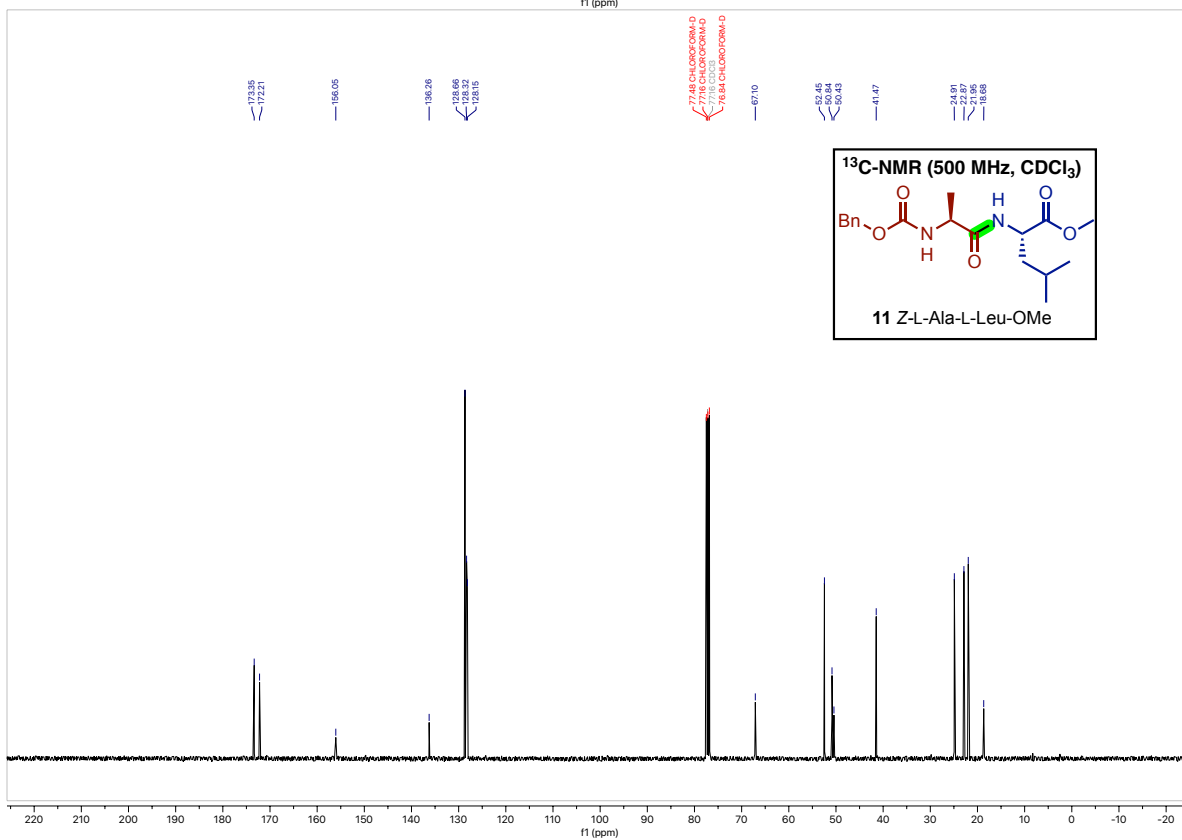

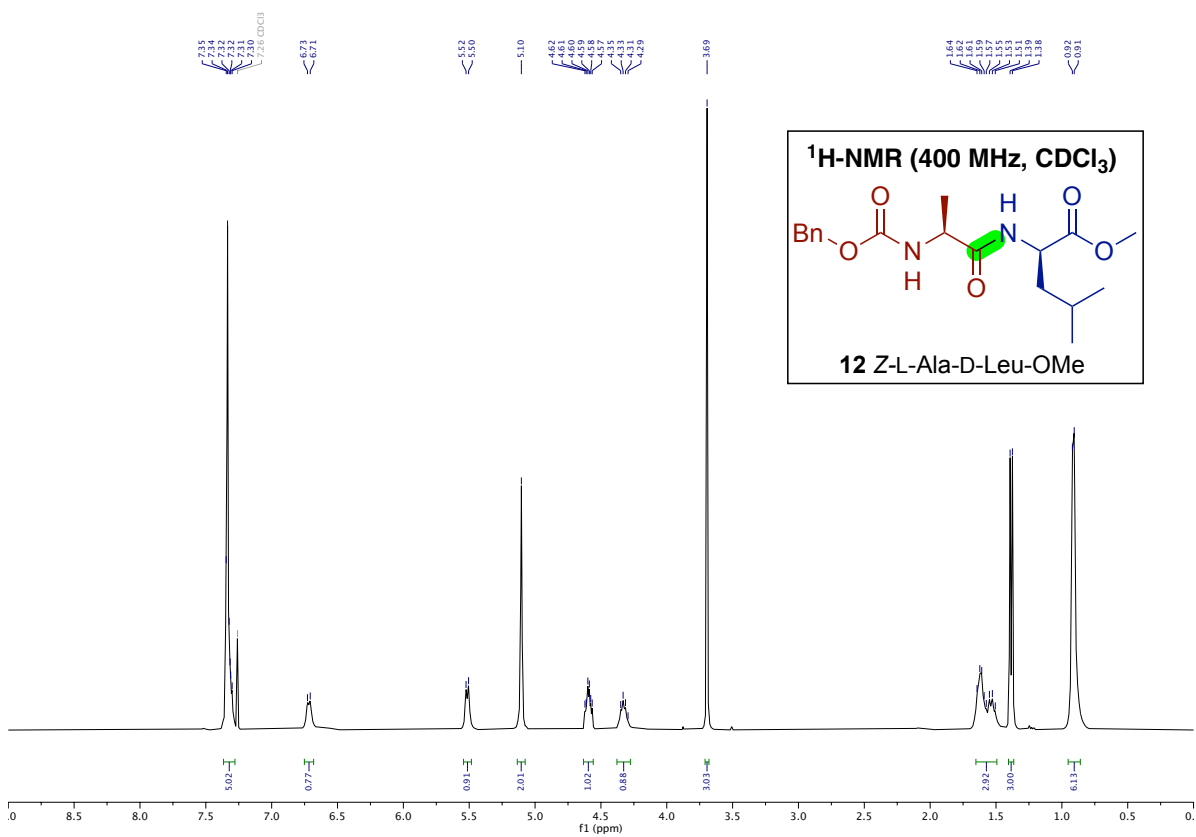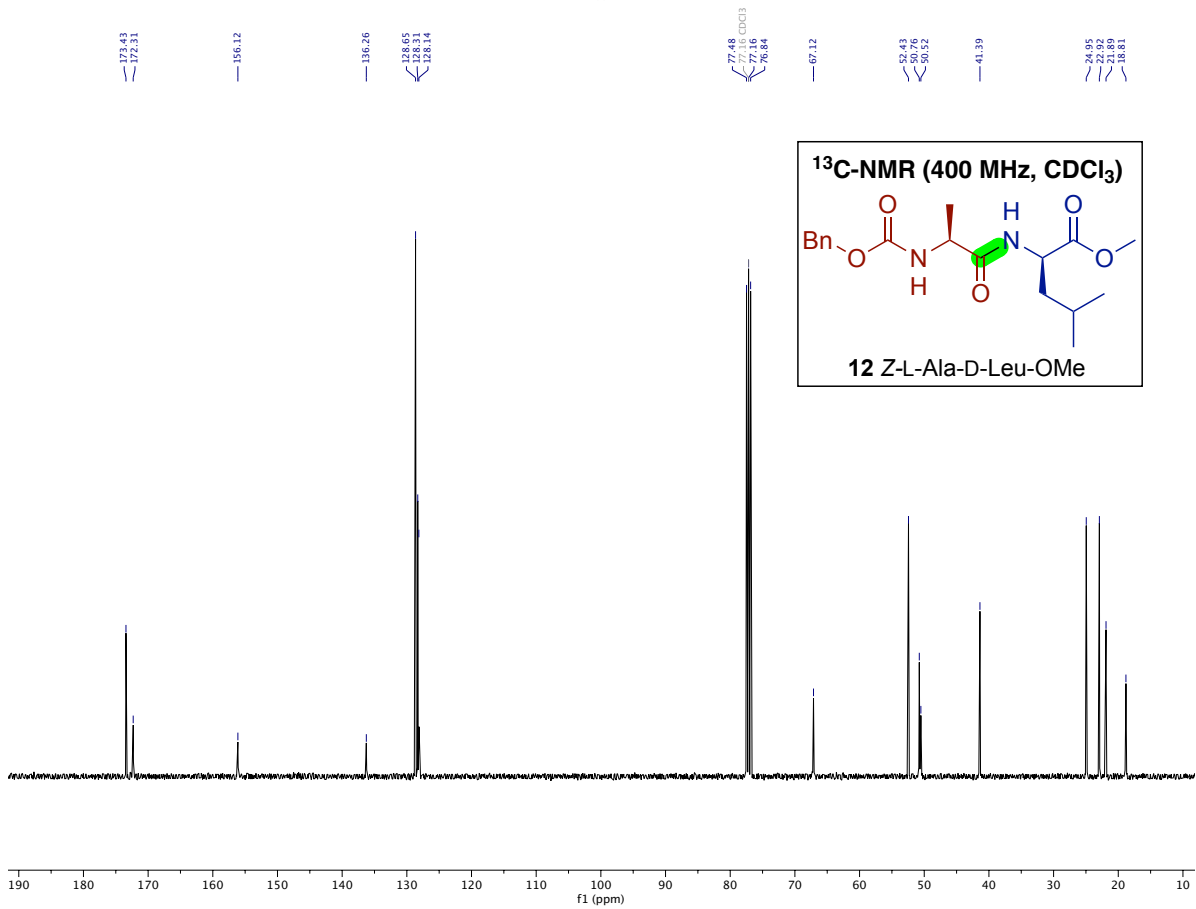

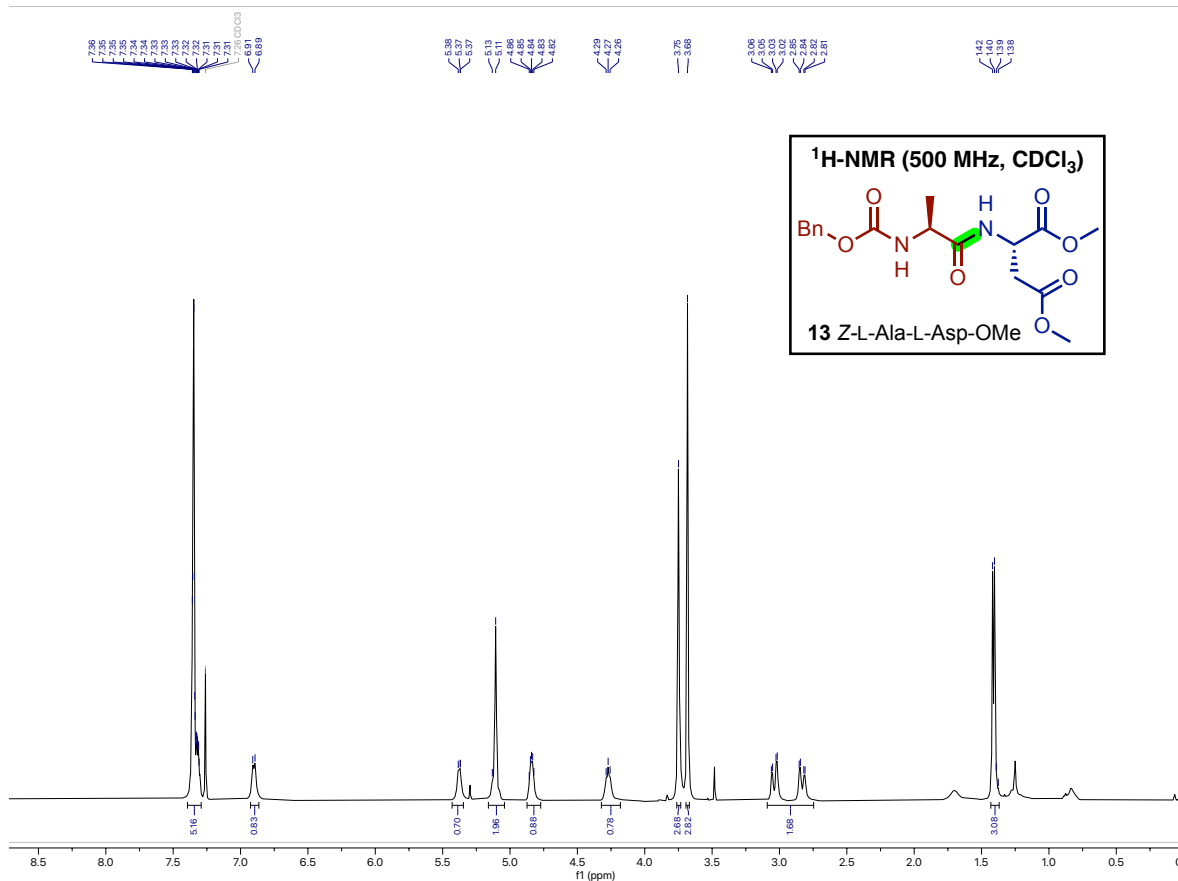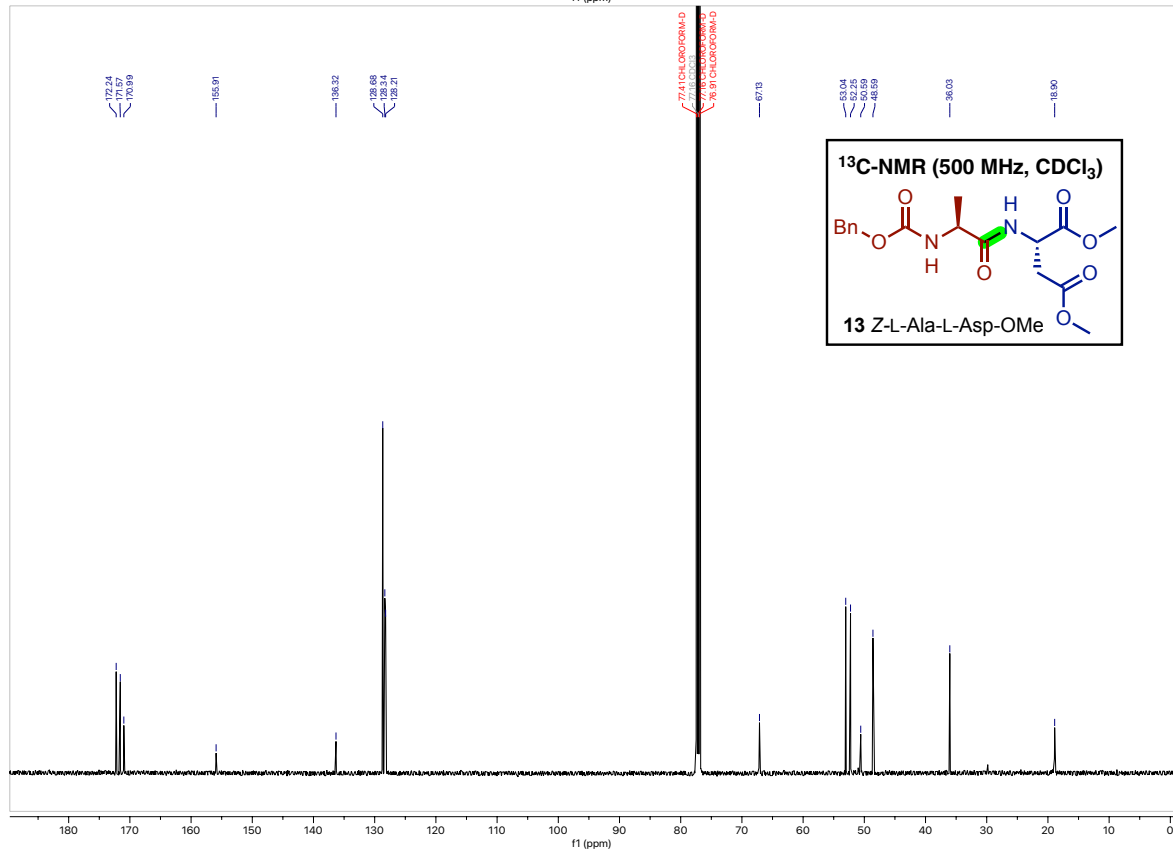

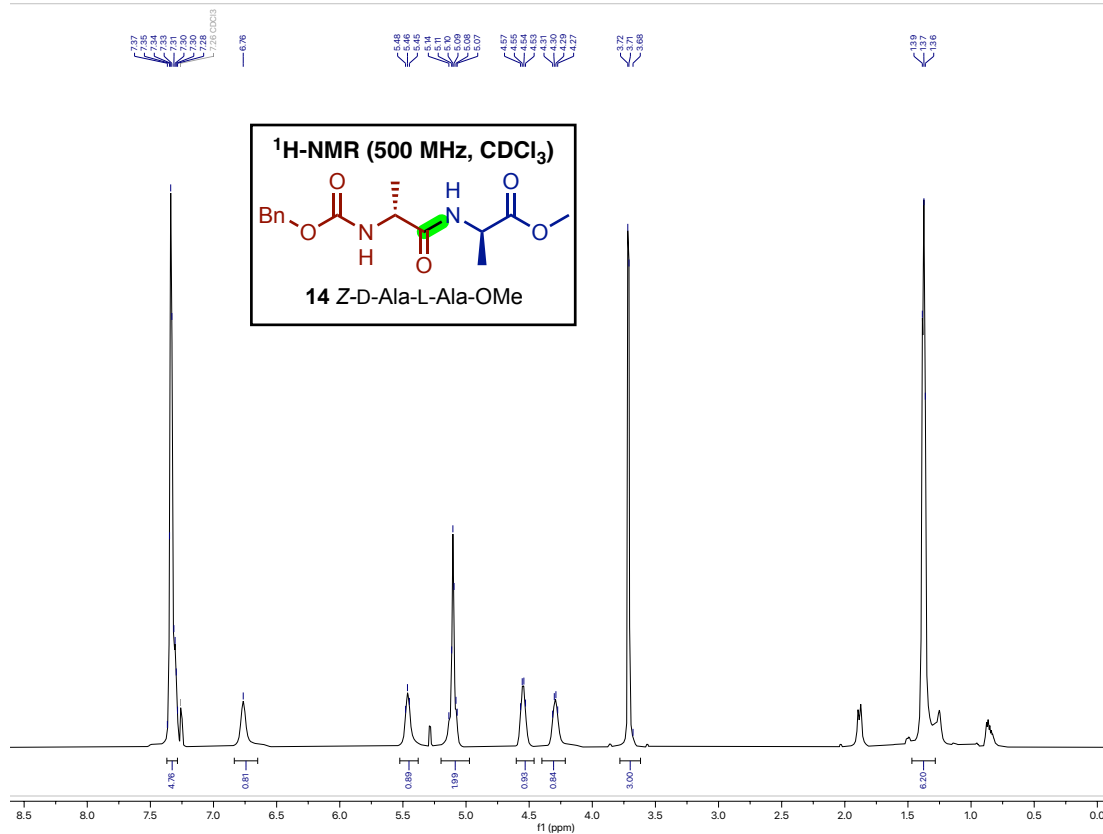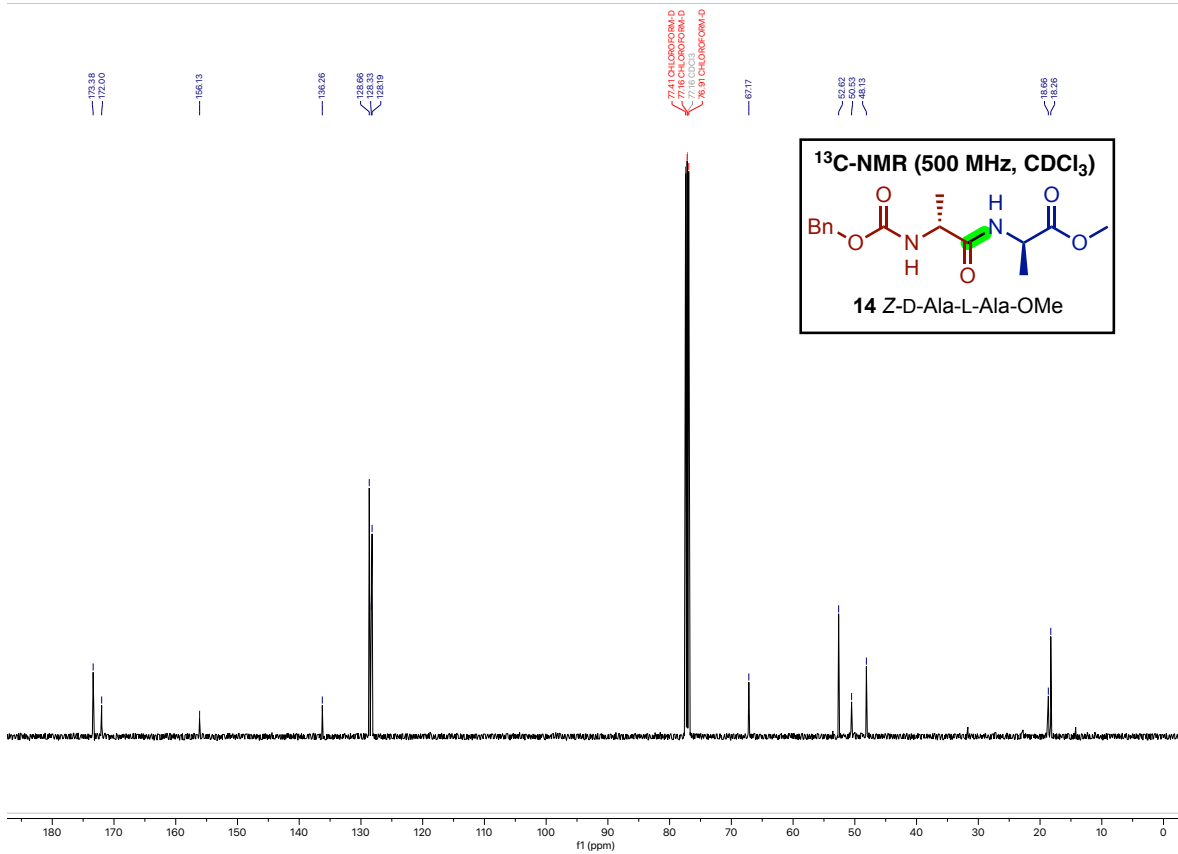

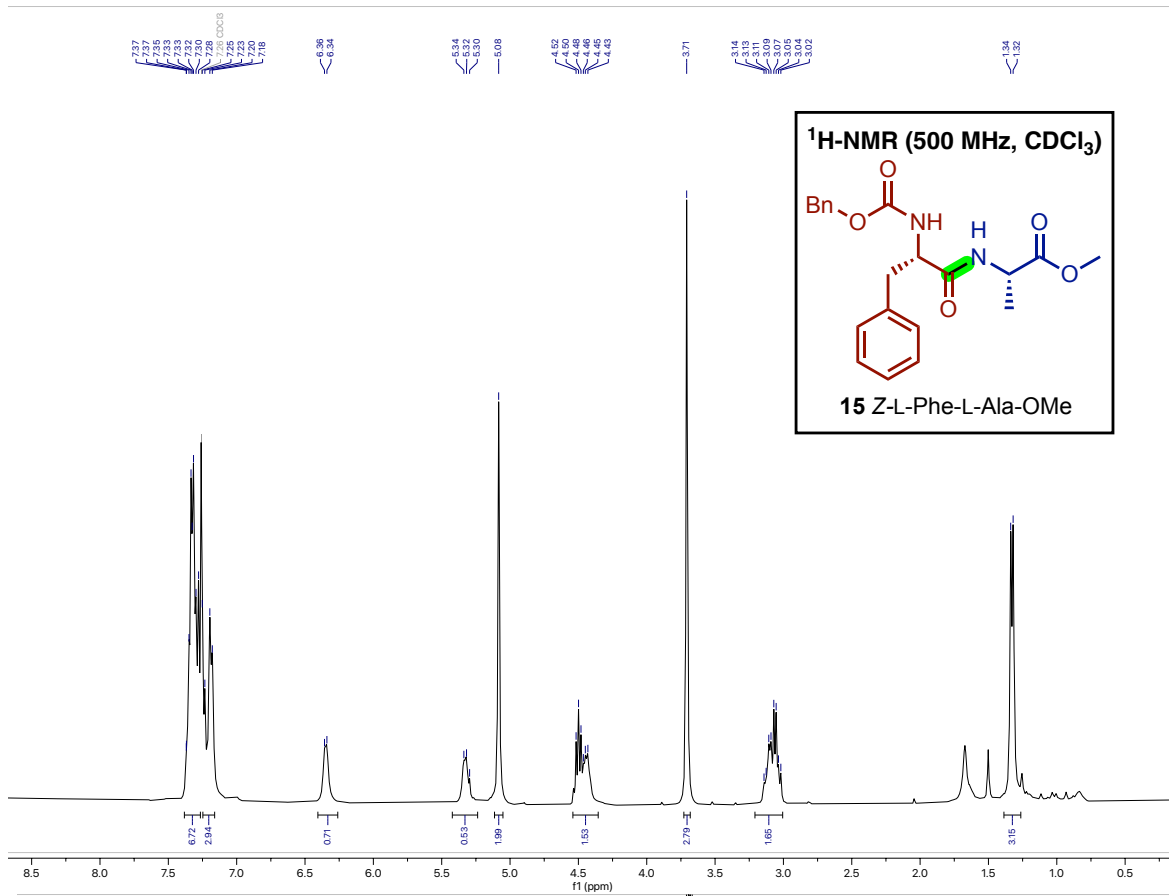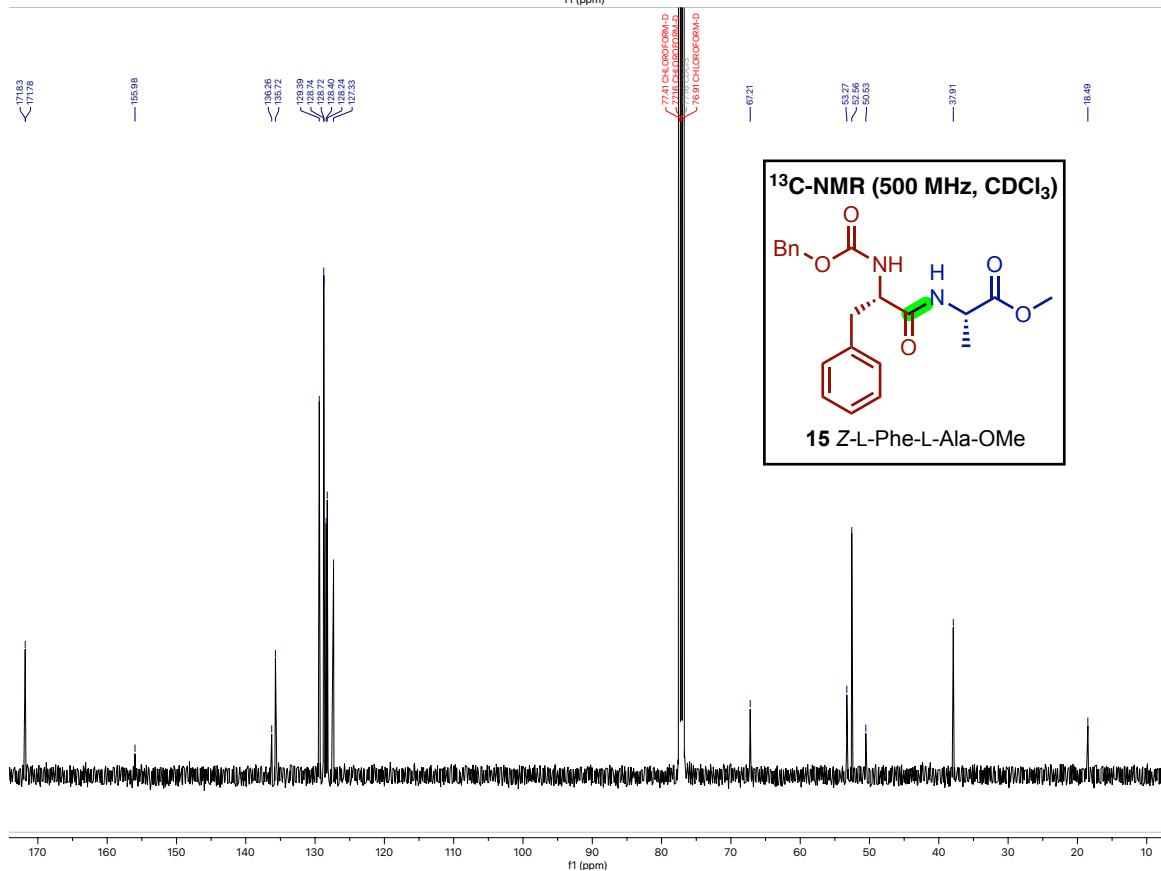

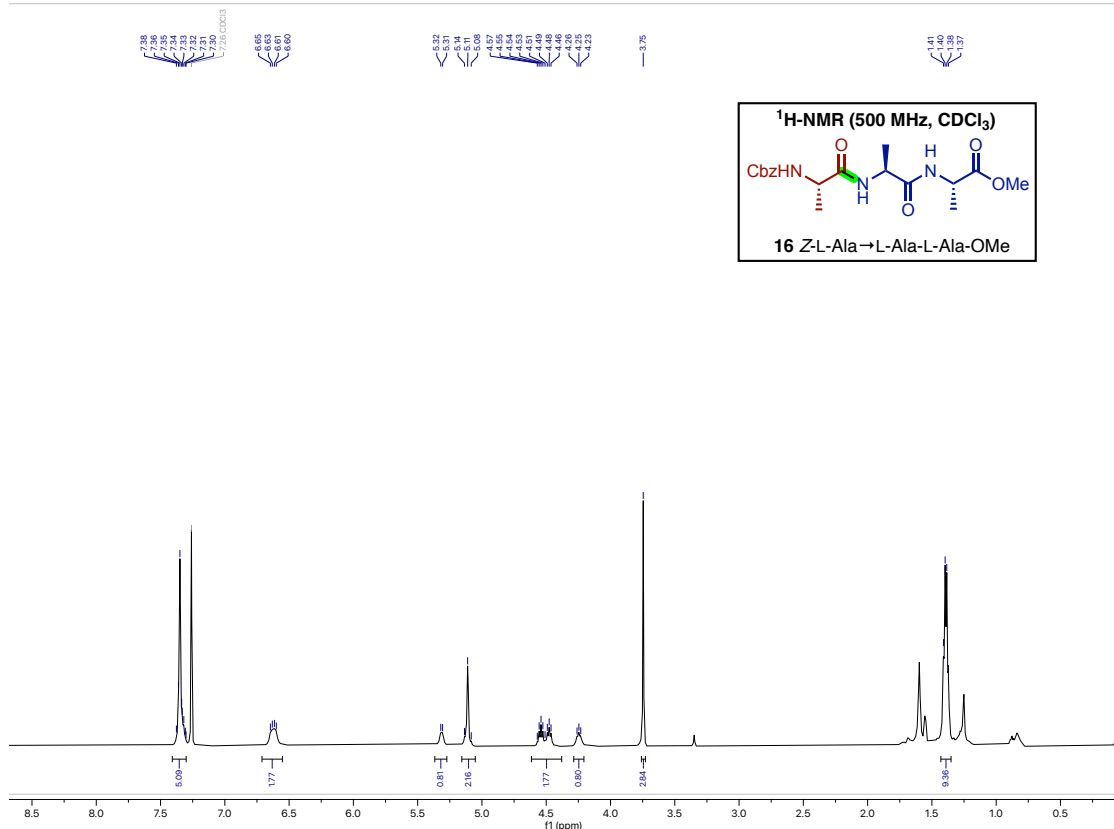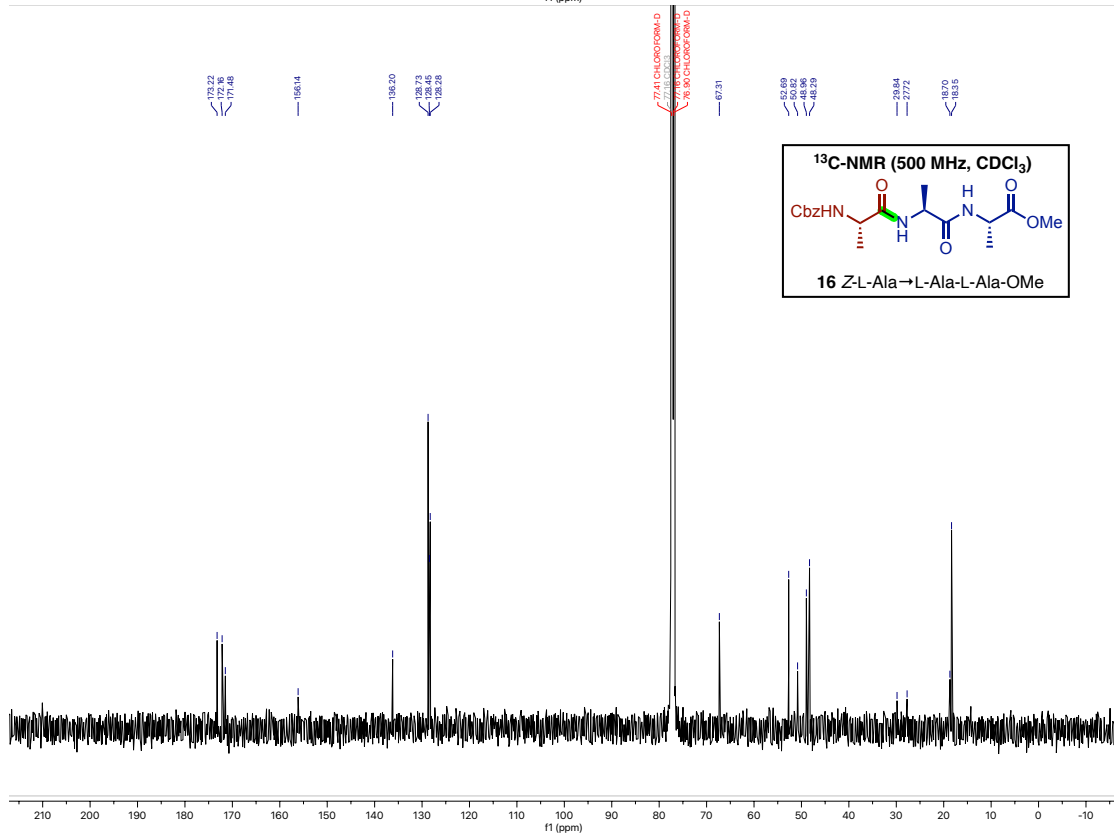

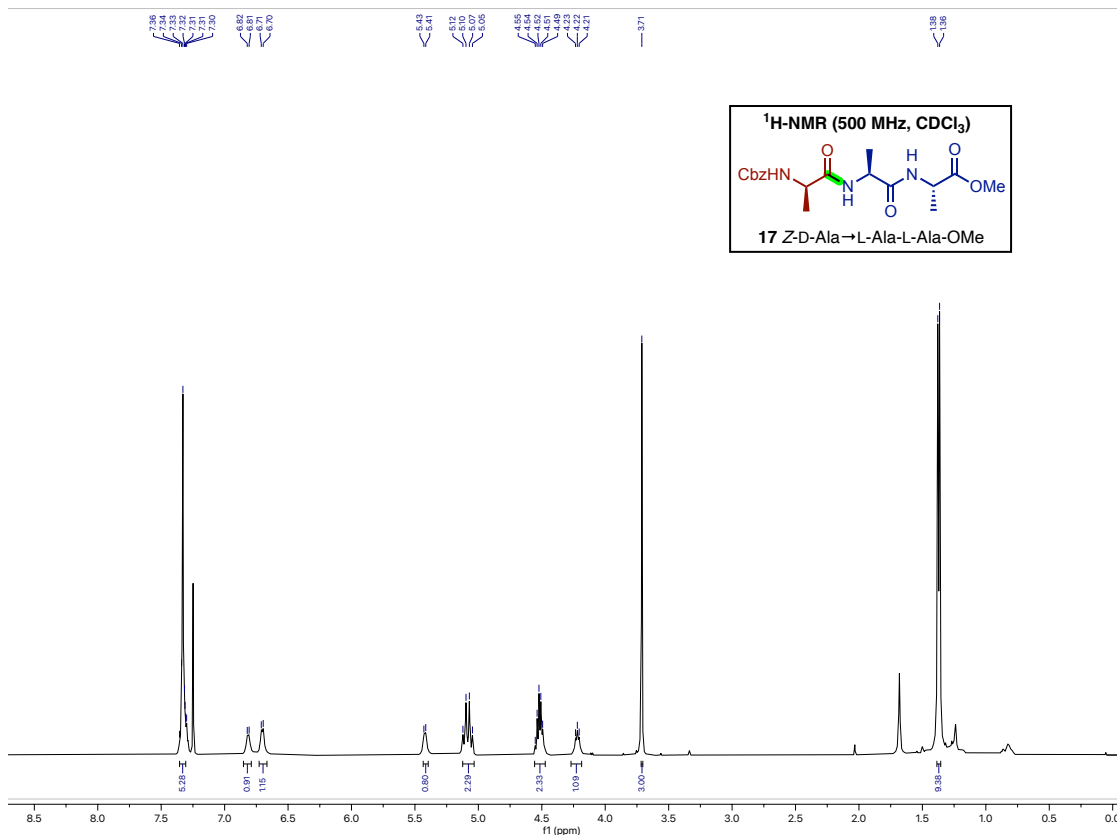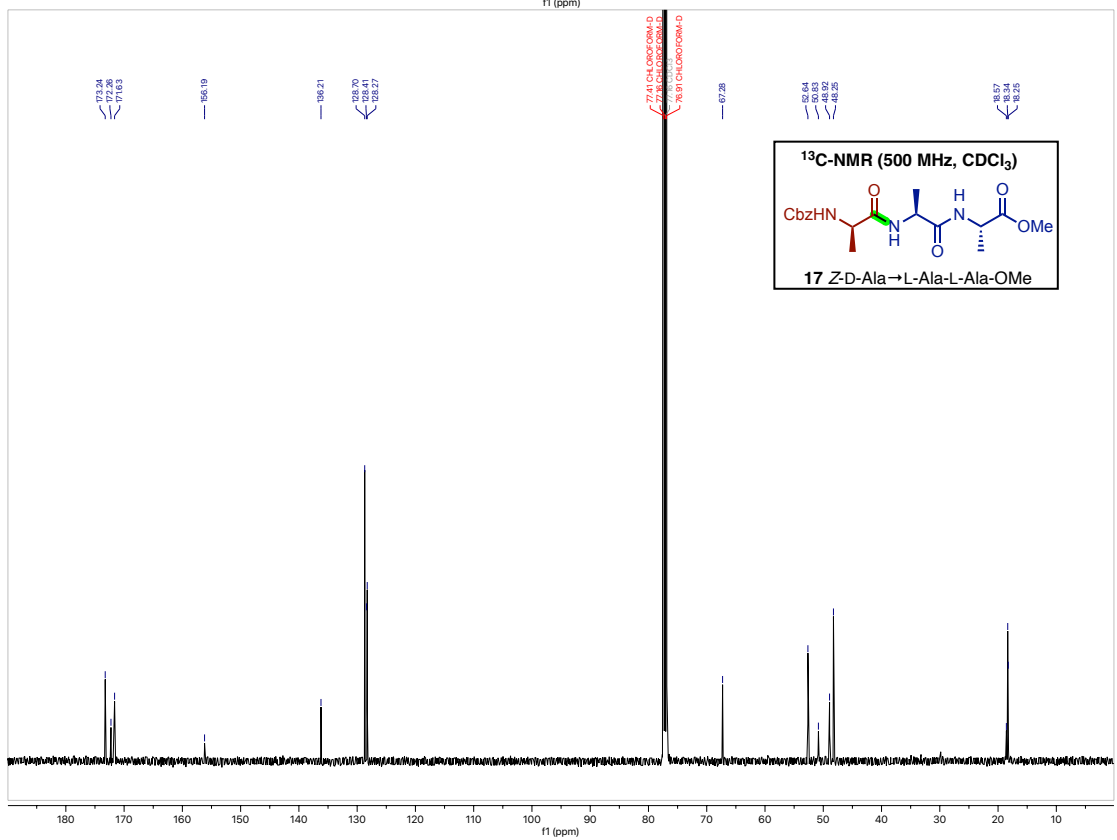



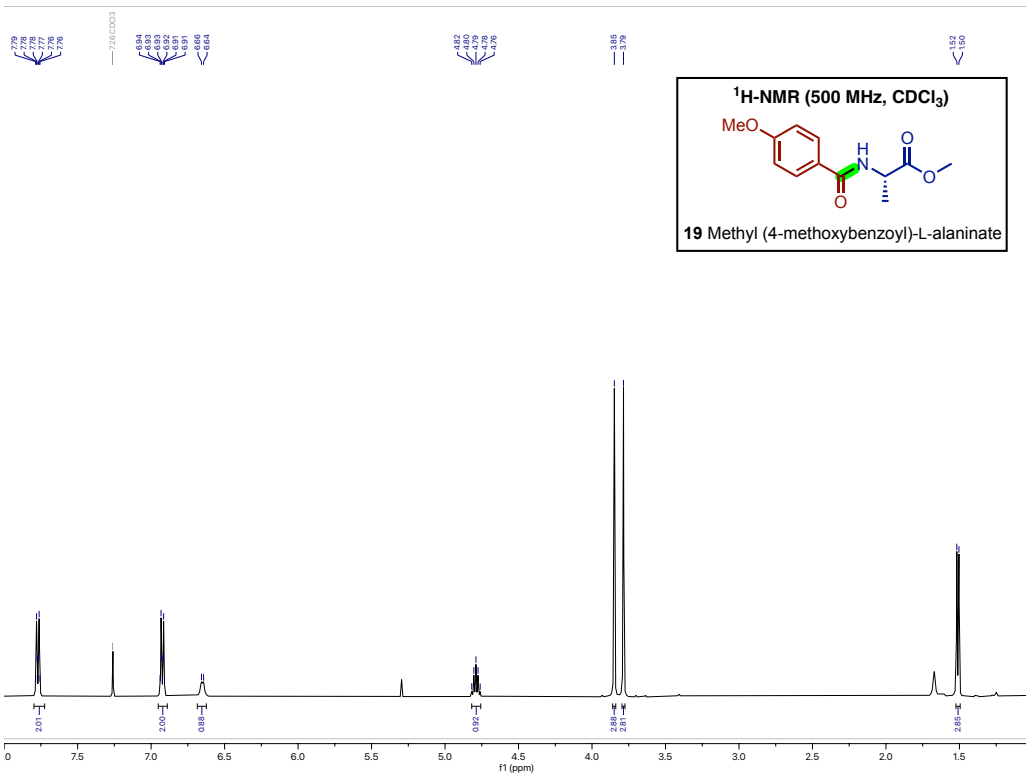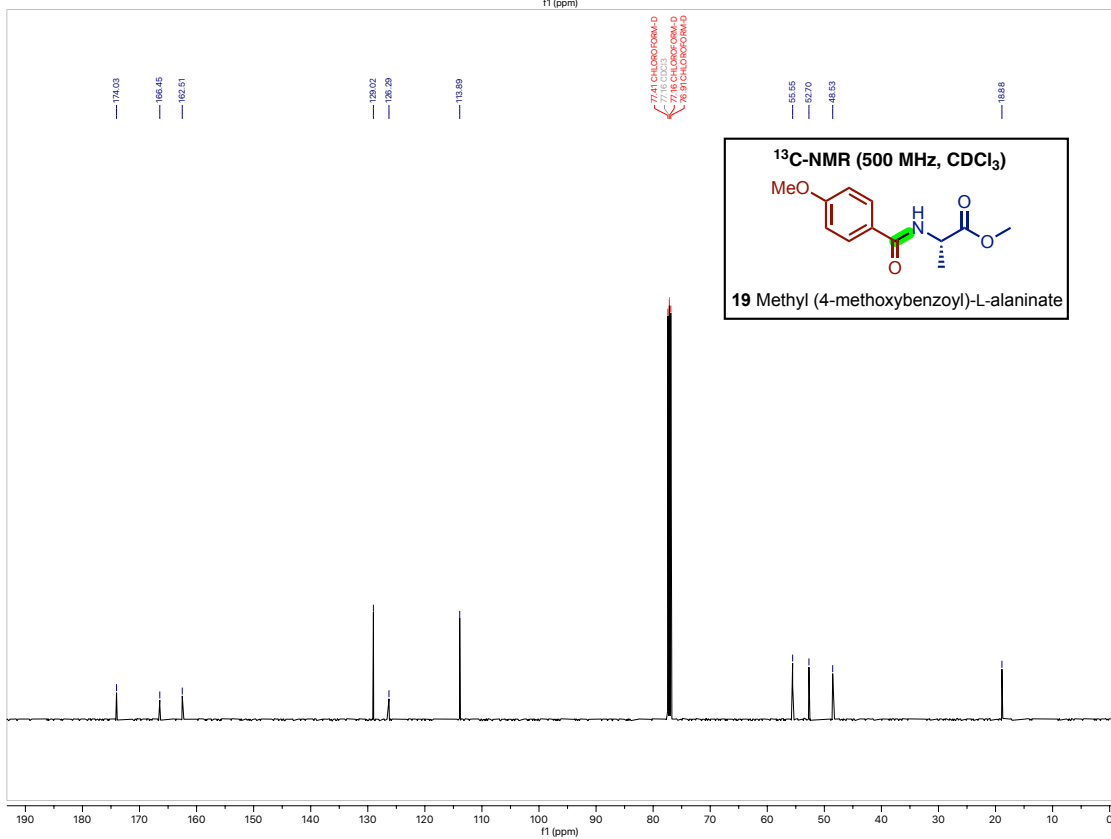

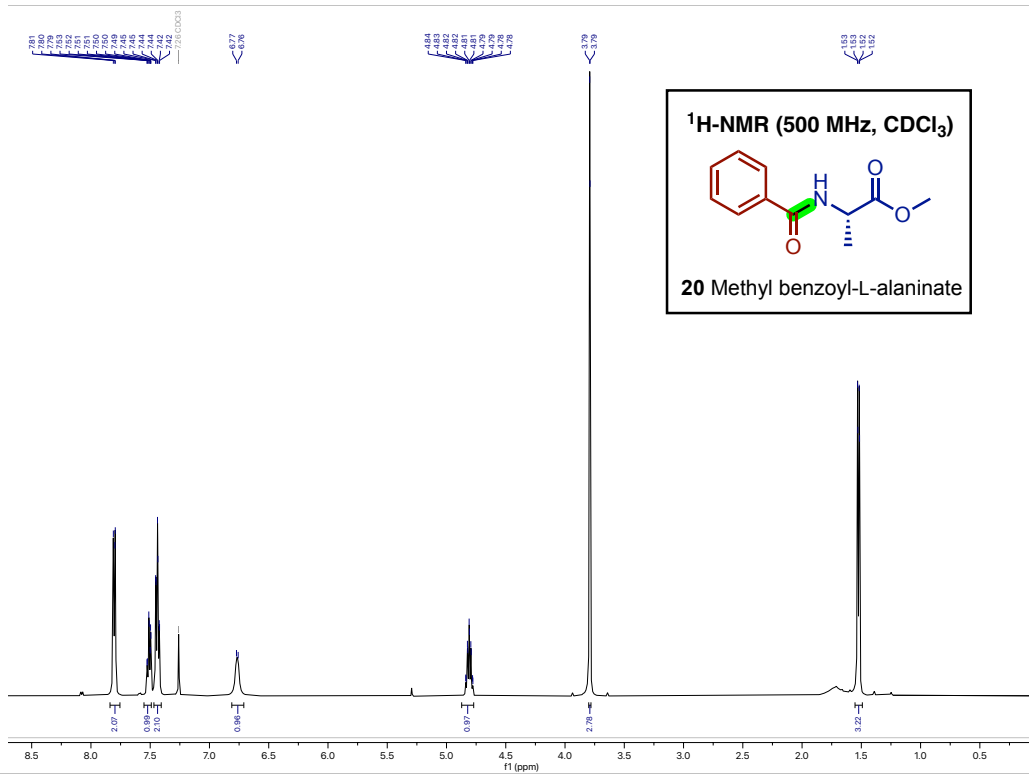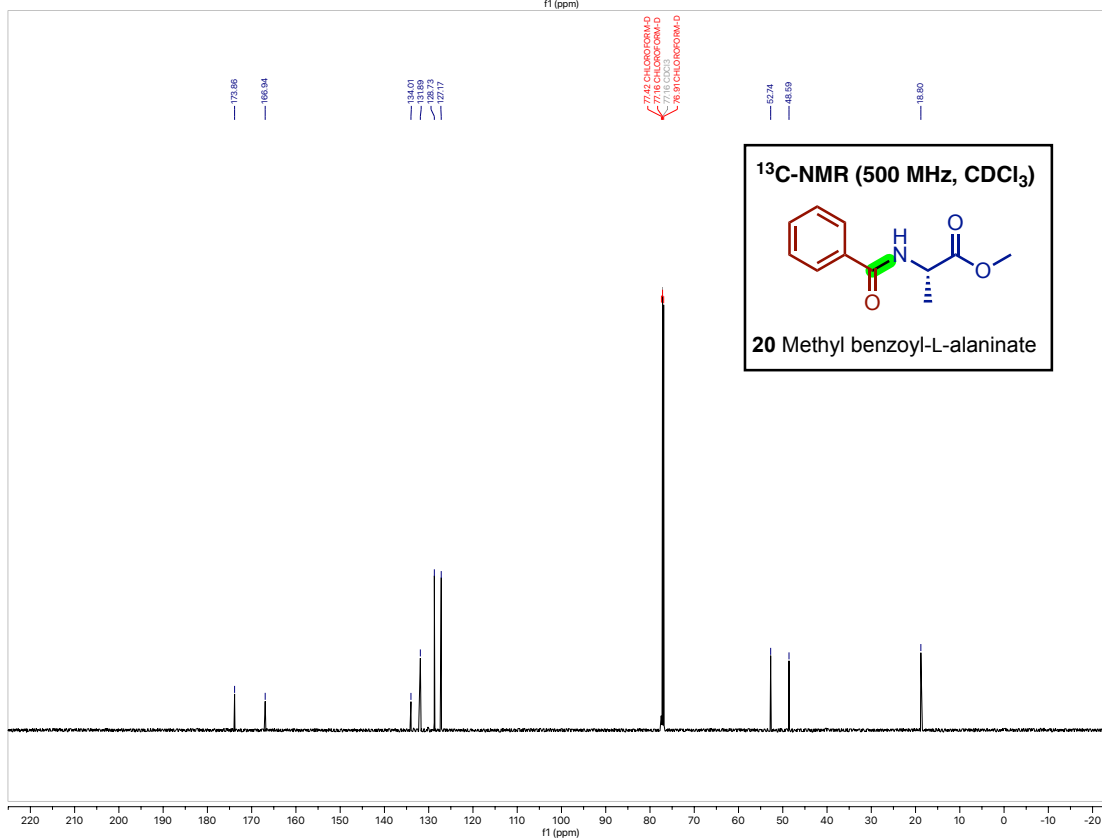

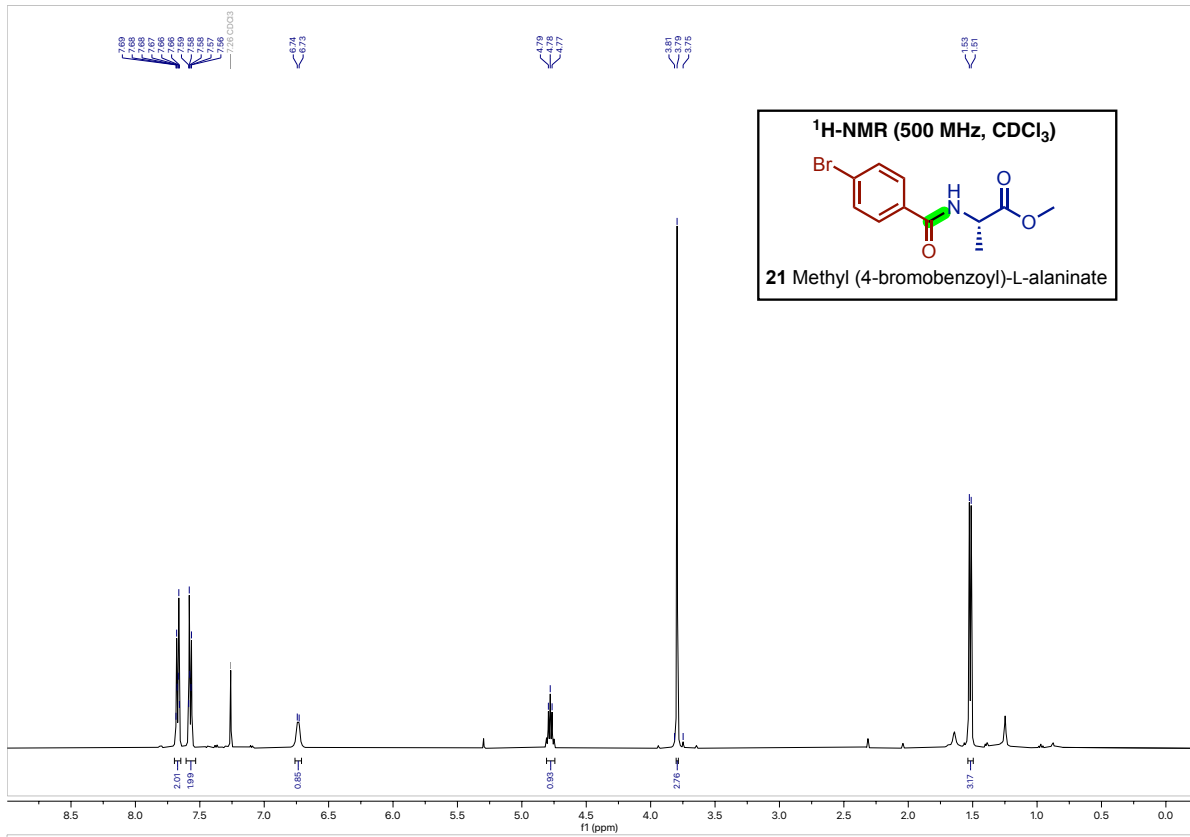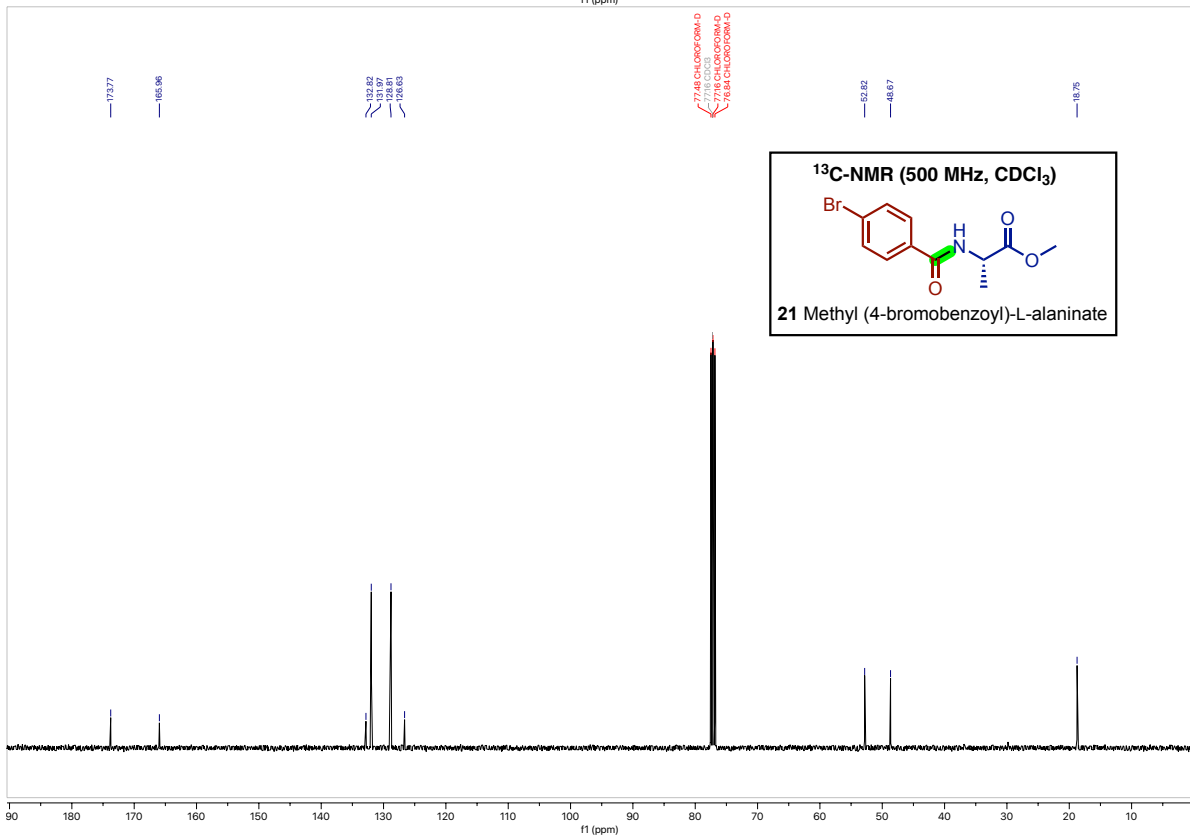

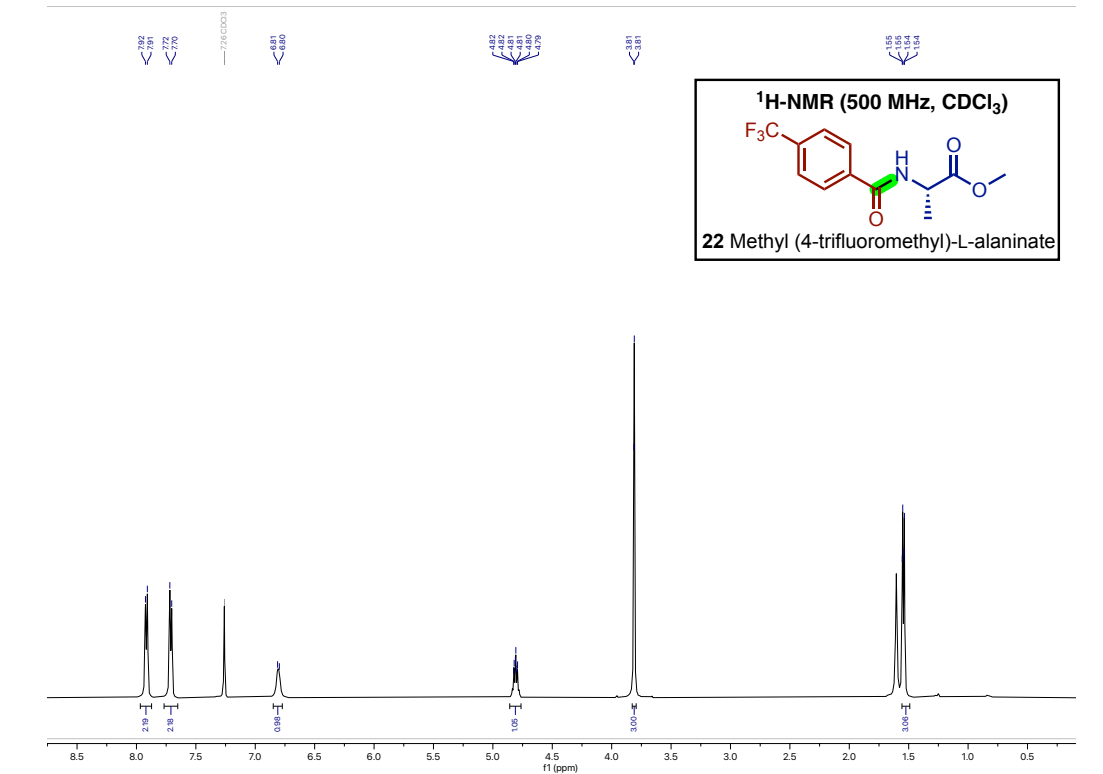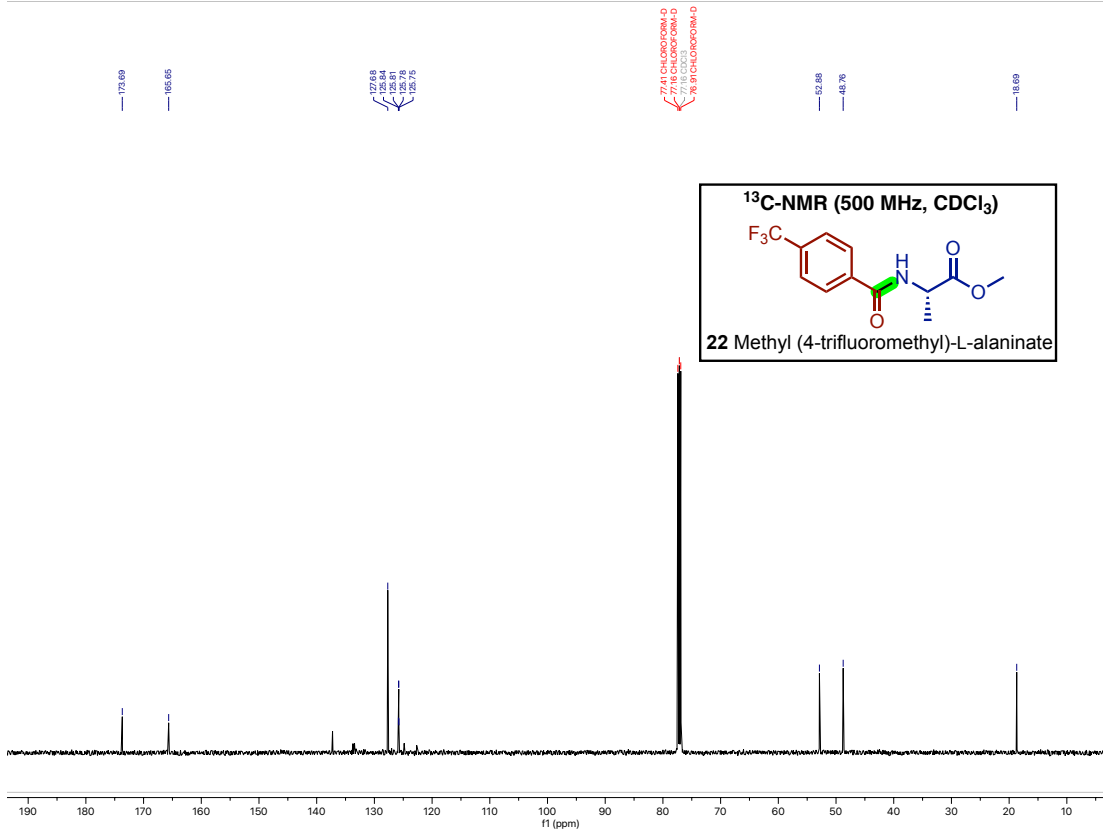



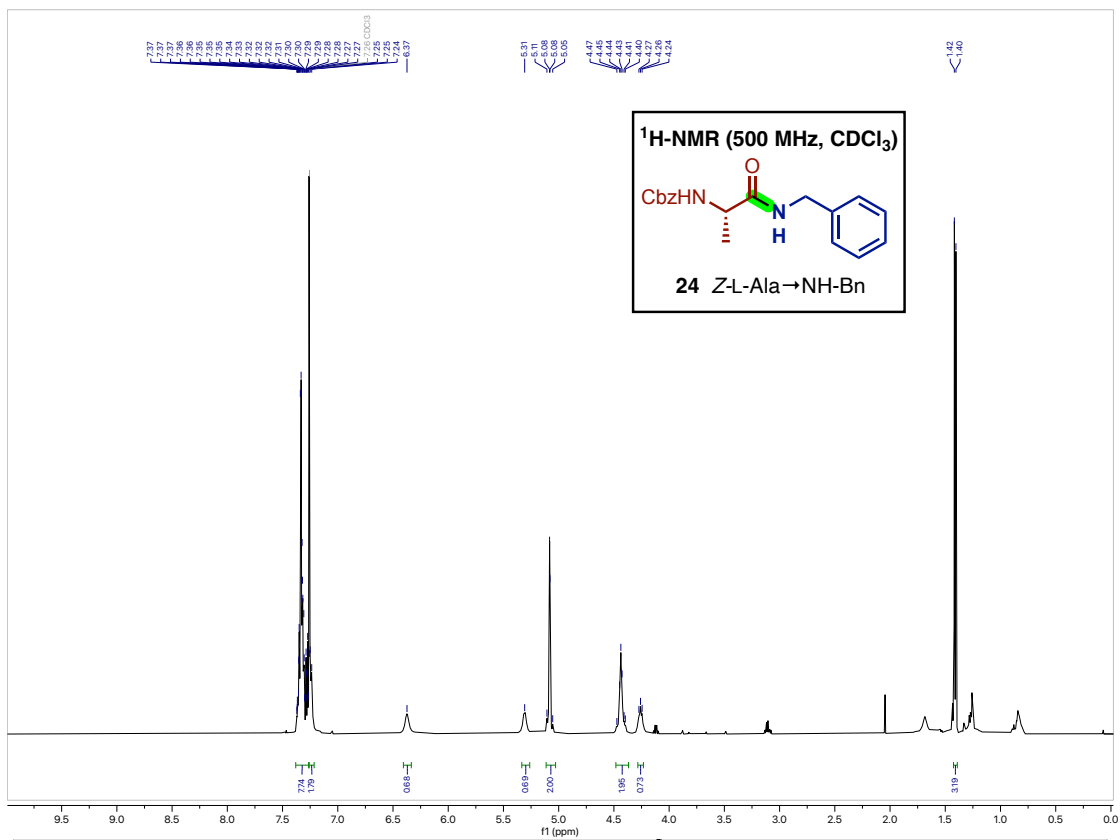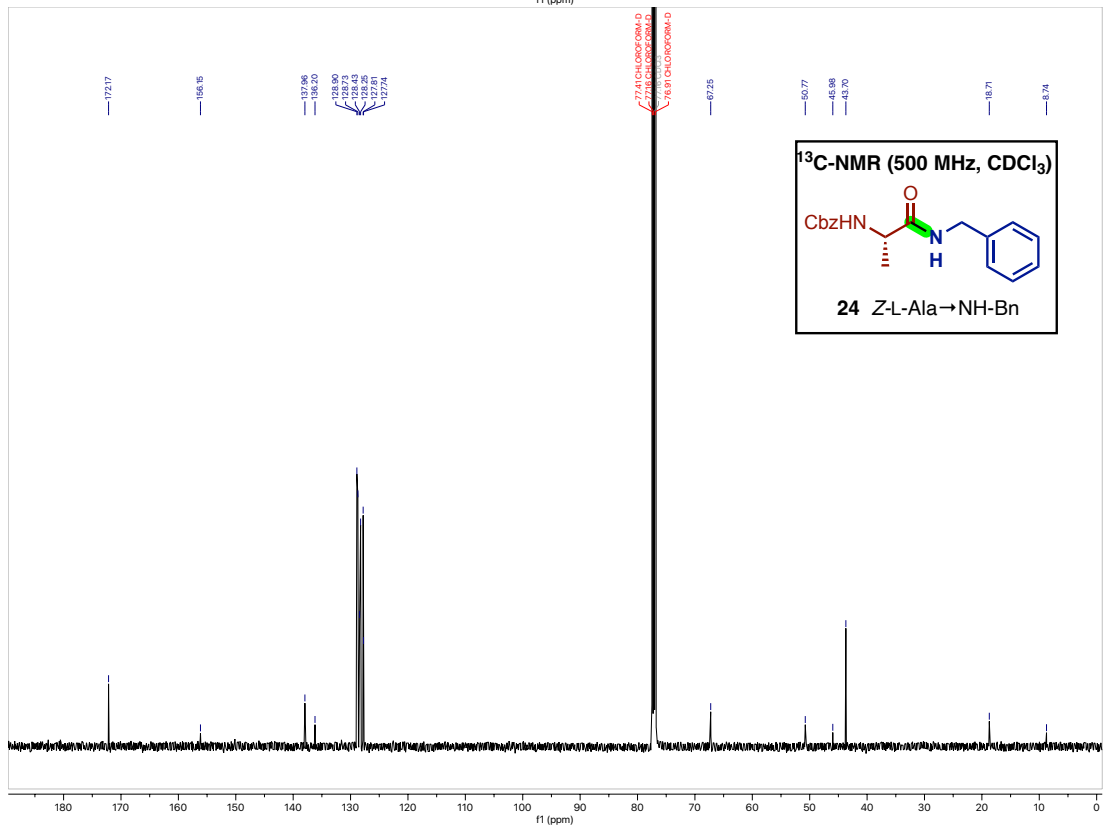

Supplement: d6nj01410k1.pdf [file d6nj01410k1.pdf]
